# Supplementary material for: Random Forest Model for Predicting Claims for Outages in Telecommunications Operating Companies in Peru (2016–2024)
Source: Research Square preprint supplement (doi:10.21203/rs.3.rs-8341643/v1), 2025-12-22
Supplement: Supplementary file 1 [file f189af21c1391d99057a0372.xlsx]

## Sheet: Dataset
Empresa operadora	Mes	Departamento	Servicio involucrado	Materia reclamable	Tipo de reclamo	N° Reclamos por avería
AMÉRICA MÓVIL PERÚ S.A.C.	2016-01-01	ICA	Arrendamiento de circuitos	Problemas de calidad	Presentados	1
AMÉRICA MÓVIL PERÚ S.A.C.	2016-01-01	LA LIBERTAD	Arrendamiento de circuitos	Problemas de calidad	Presentados	1
AMÉRICA MÓVIL PERÚ S.A.C.	2016-01-01	PIURA	Arrendamiento de circuitos	Problemas de calidad	Presentados	1
AMÉRICA MÓVIL PERÚ S.A.C.	2016-01-01	CUSCO	Arrendamiento de circuitos	Otros	Solucionados	1
AMÉRICA MÓVIL PERÚ S.A.C.	2016-01-01	LA LIBERTAD	Arrendamiento de circuitos	Otros	Solucionados	1
AMÉRICA MÓVIL PERÚ S.A.C.	2016-01-01	PIURA	Arrendamiento de circuitos	Otros	Solucionados	1
AMERICATEL PERÚ S.A.	2016-01-01	AYACUCHO	Arrendamiento de circuitos	Problemas de calidad	Presentados	1
AMERICATEL PERÚ S.A.	2016-01-01	PUNO	Arrendamiento de circuitos	Problemas de calidad	Presentados	1
AMERICATEL PERÚ S.A.	2016-01-01	APURÍMAC	Arrendamiento de circuitos	Servicio no operativo	Presentados	1
AMERICATEL PERÚ S.A.	2016-01-01	AYACUCHO	Arrendamiento de circuitos	Servicio no operativo	Presentados	1
AMERICATEL PERÚ S.A.	2016-01-01	LORETO	Arrendamiento de circuitos	Servicio no operativo	Presentados	1
AMERICATEL PERÚ S.A.	2016-01-01	MADRE DE DIOS	Arrendamiento de circuitos	Servicio no operativo	Presentados	1
AMERICATEL PERÚ S.A.	2016-01-01	MOQUEGUA	Arrendamiento de circuitos	Servicio no operativo	Presentados	1
AMERICATEL PERÚ S.A.	2016-01-01	PUNO	Arrendamiento de circuitos	Servicio no operativo	Presentados	1
AMERICATEL PERÚ S.A.	2016-01-01	APURÍMAC	Arrendamiento de circuitos	Otros	Solucionados	1
AMERICATEL PERÚ S.A.	2016-01-01	AYACUCHO	Arrendamiento de circuitos	Otros	Solucionados	1
AMERICATEL PERÚ S.A.	2016-01-01	MOQUEGUA	Arrendamiento de circuitos	Otros	Solucionados	1
AMERICATEL PERÚ S.A.	2016-01-01	PUNO	Arrendamiento de circuitos	Otros	Solucionados	1
GILAT TO HOME PERÚ S.A.	2016-01-01	ÁNCASH	Arrendamiento de circuitos	Problemas de calidad	Presentados	1
GILAT TO HOME PERÚ S.A.	2016-01-01	APURÍMAC	Arrendamiento de circuitos	Problemas de calidad	Presentados	1
GILAT TO HOME PERÚ S.A.	2016-01-01	AREQUIPA	Arrendamiento de circuitos	Problemas de calidad	Presentados	1
GILAT TO HOME PERÚ S.A.	2016-01-01	ÁNCASH	Arrendamiento de circuitos	Otros	Solucionados	1
GILAT TO HOME PERÚ S.A.	2016-01-01	APURÍMAC	Arrendamiento de circuitos	Otros	Solucionados	1
GILAT TO HOME PERÚ S.A.	2016-01-01	AREQUIPA	Arrendamiento de circuitos	Otros	Solucionados	1
INTERNEXA PERÚ S.A.	2016-01-01	ÁNCASH	Arrendamiento de circuitos	Servicio no operativo	Presentados	1
INTERNEXA PERÚ S.A.	2016-01-01	LAMBAYEQUE	Arrendamiento de circuitos	Servicio no operativo	Presentados	1
SENCINET LATAM PERU S.A.C.	2016-01-01	ICA	Arrendamiento de circuitos	Problemas de calidad	Presentados	1
SENCINET LATAM PERU S.A.C.	2016-01-01	AREQUIPA	Arrendamiento de circuitos	Servicio no operativo	Presentados	1
SENCINET LATAM PERU S.A.C.	2016-01-01	ICA	Arrendamiento de circuitos	Servicio no operativo	Presentados	1
SENCINET LATAM PERU S.A.C.	2016-01-01	LIMA Y CALLAO	Arrendamiento de circuitos	Servicio no operativo	Presentados	1
SENCINET LATAM PERU S.A.C.	2016-01-01	UCAYALI	Arrendamiento de circuitos	Otros	Presentados	1
AMÉRICA MÓVIL PERÚ S.A.C.	2016-01-01	CUSCO	Arrendamiento de circuitos	Problemas de calidad	Presentados	2
AMÉRICA MÓVIL PERÚ S.A.C.	2016-01-01	LAMBAYEQUE	Arrendamiento de circuitos	Otros	Solucionados	2
AMERICATEL PERÚ S.A.	2016-01-01	AREQUIPA	Arrendamiento de circuitos	Problemas de calidad	Presentados	2
AMERICATEL PERÚ S.A.	2016-01-01	ÁNCASH	Arrendamiento de circuitos	Servicio no operativo	Presentados	2
AMERICATEL PERÚ S.A.	2016-01-01	LAMBAYEQUE	Arrendamiento de circuitos	Servicio no operativo	Presentados	2
AMERICATEL PERÚ S.A.	2016-01-01	PASCO	Arrendamiento de circuitos	Servicio no operativo	Presentados	2
AMERICATEL PERÚ S.A.	2016-01-01	PASCO	Arrendamiento de circuitos	Otros	Solucionados	2
GILAT TO HOME PERÚ S.A.	2016-01-01	AMAZONAS	Arrendamiento de circuitos	Problemas de calidad	Presentados	2
GILAT TO HOME PERÚ S.A.	2016-01-01	AMAZONAS	Arrendamiento de circuitos	Otros	Solucionados	2
INTERNEXA PERÚ S.A.	2016-01-01	AREQUIPA	Arrendamiento de circuitos	Servicio no operativo	Presentados	2
INTERNEXA PERÚ S.A.	2016-01-01	CUSCO	Arrendamiento de circuitos	Servicio no operativo	Presentados	2
INTERNEXA PERÚ S.A.	2016-01-01	JUNÍN	Arrendamiento de circuitos	Servicio no operativo	Presentados	2
INTERNEXA PERÚ S.A.	2016-01-01	PIURA	Arrendamiento de circuitos	Servicio no operativo	Presentados	2
SENCINET LATAM PERU S.A.C.	2016-01-01	PUNO	Arrendamiento de circuitos	Problemas de calidad	Presentados	2
SENCINET LATAM PERU S.A.C.	2016-01-01	LORETO	Arrendamiento de circuitos	Servicio no operativo	Presentados	2
SENCINET LATAM PERU S.A.C.	2016-01-01	PUNO	Arrendamiento de circuitos	Servicio no operativo	Presentados	2
SENCINET LATAM PERU S.A.C.	2016-01-01	SAN MARTÍN	Arrendamiento de circuitos	Servicio no operativo	Presentados	2
AMÉRICA MÓVIL PERÚ S.A.C.	2016-01-01	LAMBAYEQUE	Arrendamiento de circuitos	Problemas de calidad	Presentados	3
AMERICATEL PERÚ S.A.	2016-01-01	JUNÍN	Arrendamiento de circuitos	Problemas de calidad	Presentados	3
AMERICATEL PERÚ S.A.	2016-01-01	LA LIBERTAD	Arrendamiento de circuitos	Problemas de calidad	Presentados	3
AMERICATEL PERÚ S.A.	2016-01-01	JUNÍN	Arrendamiento de circuitos	Servicio no operativo	Presentados	3
AMERICATEL PERÚ S.A.	2016-01-01	ICA	Arrendamiento de circuitos	Otros	Solucionados	3
AMERICATEL PERÚ S.A.	2016-01-01	JUNÍN	Arrendamiento de circuitos	Otros	Solucionados	3
INTERNEXA PERÚ S.A.	2016-01-01	LA LIBERTAD	Arrendamiento de circuitos	Servicio no operativo	Presentados	3
SENCINET LATAM PERU S.A.C.	2016-01-01	LIMA Y CALLAO	Arrendamiento de circuitos	Problemas de calidad	Presentados	3
AMERICATEL PERÚ S.A.	2016-01-01	CUSCO	Arrendamiento de circuitos	Problemas de calidad	Presentados	4
AMERICATEL PERÚ S.A.	2016-01-01	PIURA	Arrendamiento de circuitos	Problemas de calidad	Presentados	4
AMERICATEL PERÚ S.A.	2016-01-01	PIURA	Arrendamiento de circuitos	Otros	Solucionados	4
AMERICATEL PERÚ S.A.	2016-01-01	CUSCO	Arrendamiento de circuitos	Servicio no operativo	Presentados	5
AMERICATEL PERÚ S.A.	2016-01-01	ICA	Arrendamiento de circuitos	Servicio no operativo	Presentados	5
AMERICATEL PERÚ S.A.	2016-01-01	AREQUIPA	Arrendamiento de circuitos	Otros	Solucionados	5
INTERNEXA PERÚ S.A.	2016-01-01	ICA	Arrendamiento de circuitos	Servicio no operativo	Presentados	5
AMERICATEL PERÚ S.A.	2016-01-01	LAMBAYEQUE	Arrendamiento de circuitos	Problemas de calidad	Presentados	6
AMERICATEL PERÚ S.A.	2016-01-01	AREQUIPA	Arrendamiento de circuitos	Servicio no operativo	Presentados	6
AMERICATEL PERÚ S.A.	2016-01-01	CUSCO	Arrendamiento de circuitos	Otros	Solucionados	7
AMERICATEL PERÚ S.A.	2016-01-01	LA LIBERTAD	Arrendamiento de circuitos	Otros	Solucionados	7
AMERICATEL PERÚ S.A.	2016-01-01	LAMBAYEQUE	Arrendamiento de circuitos	Otros	Solucionados	7
AMERICATEL PERÚ S.A.	2016-01-01	LA LIBERTAD	Arrendamiento de circuitos	Servicio no operativo	Presentados	8
AMÉRICA MÓVIL PERÚ S.A.C.	2016-01-01	LIMA Y CALLAO	Arrendamiento de circuitos	Otros	Solucionados	11
INTERNEXA PERÚ S.A.	2016-01-01	LIMA Y CALLAO	Arrendamiento de circuitos	Servicio no operativo	Presentados	15
AMÉRICA MÓVIL PERÚ S.A.C.	2016-01-01	LIMA Y CALLAO	Arrendamiento de circuitos	Problemas de calidad	Presentados	23
AMERICATEL PERÚ S.A.	2016-01-01	LIMA Y CALLAO	Arrendamiento de circuitos	Problemas de calidad	Presentados	31
AMERICATEL PERÚ S.A.	2016-01-01	LIMA Y CALLAO	Arrendamiento de circuitos	Otros	Solucionados	69
AMERICATEL PERÚ S.A.	2016-01-01	LIMA Y CALLAO	Arrendamiento de circuitos	Servicio no operativo	Presentados	82
AMÉRICA MÓVIL PERÚ S.A.C.	2016-01-01	PASCO	Internet fijo	Problemas de calidad	Presentados	1
AMÉRICA MÓVIL PERÚ S.A.C.	2016-01-01	PASCO	Internet fijo	Otros	Solucionados	1
AMERICATEL PERÚ S.A.	2016-01-01	APURÍMAC	Internet fijo	Problemas de calidad	Presentados	1
AMERICATEL PERÚ S.A.	2016-01-01	CUSCO	Internet fijo	Problemas de calidad	Presentados	1
AMERICATEL PERÚ S.A.	2016-01-01	HUANCAVELICA	Internet fijo	Problemas de calidad	Presentados	1
AMERICATEL PERÚ S.A.	2016-01-01	LA LIBERTAD	Internet fijo	Problemas de calidad	Presentados	1
AMERICATEL PERÚ S.A.	2016-01-01	PASCO	Internet fijo	Problemas de calidad	Presentados	1
AMERICATEL PERÚ S.A.	2016-01-01	SAN MARTÍN	Internet fijo	Problemas de calidad	Presentados	1
AMERICATEL PERÚ S.A.	2016-01-01	AMAZONAS	Internet fijo	Servicio no operativo	Presentados	1
AMERICATEL PERÚ S.A.	2016-01-01	ÁNCASH	Internet fijo	Servicio no operativo	Presentados	1
AMERICATEL PERÚ S.A.	2016-01-01	APURÍMAC	Internet fijo	Servicio no operativo	Presentados	1
AMERICATEL PERÚ S.A.	2016-01-01	AYACUCHO	Internet fijo	Servicio no operativo	Presentados	1
AMERICATEL PERÚ S.A.	2016-01-01	ICA	Internet fijo	Servicio no operativo	Presentados	1
AMERICATEL PERÚ S.A.	2016-01-01	JUNÍN	Internet fijo	Servicio no operativo	Presentados	1
AMERICATEL PERÚ S.A.	2016-01-01	MOQUEGUA	Internet fijo	Servicio no operativo	Presentados	1
AMERICATEL PERÚ S.A.	2016-01-01	PASCO	Internet fijo	Servicio no operativo	Presentados	1
AMERICATEL PERÚ S.A.	2016-01-01	PIURA	Internet fijo	Servicio no operativo	Presentados	1
AMERICATEL PERÚ S.A.	2016-01-01	TACNA	Internet fijo	Servicio no operativo	Presentados	1
AMERICATEL PERÚ S.A.	2016-01-01	ÁNCASH	Internet fijo	Otros	Solucionados	1
AMERICATEL PERÚ S.A.	2016-01-01	AYACUCHO	Internet fijo	Otros	Solucionados	1
AMERICATEL PERÚ S.A.	2016-01-01	HUANCAVELICA	Internet fijo	Otros	Solucionados	1
AMERICATEL PERÚ S.A.	2016-01-01	LA LIBERTAD	Internet fijo	Otros	Solucionados	1
AMERICATEL PERÚ S.A.	2016-01-01	LORETO	Internet fijo	Otros	Solucionados	1
AMERICATEL PERÚ S.A.	2016-01-01	MOQUEGUA	Internet fijo	Otros	Solucionados	1
AMERICATEL PERÚ S.A.	2016-01-01	PIURA	Internet fijo	Otros	Solucionados	1
AMERICATEL PERÚ S.A.	2016-01-01	PUNO	Internet fijo	Otros	Solucionados	1
COMPAÑÍA DE COMERCIO GLOBAL S.A.C.	2016-01-01	AYACUCHO	Internet fijo	Problemas de calidad	Presentados	1
COMPAÑÍA DE COMERCIO GLOBAL S.A.C.	2016-01-01	AYACUCHO	Internet fijo	Otros	Solucionados	1
GILAT TO HOME PERÚ S.A.	2016-01-01	ÁNCASH	Internet fijo	Problemas de calidad	Presentados	1
GILAT TO HOME PERÚ S.A.	2016-01-01	AYACUCHO	Internet fijo	Problemas de calidad	Presentados	1
GILAT TO HOME PERÚ S.A.	2016-01-01	CUSCO	Internet fijo	Problemas de calidad	Presentados	1
GILAT TO HOME PERÚ S.A.	2016-01-01	APURÍMAC	Internet fijo	Servicio no operativo	Presentados	1
GILAT TO HOME PERÚ S.A.	2016-01-01	PUNO	Internet fijo	Servicio no operativo	Presentados	1
GILAT TO HOME PERÚ S.A.	2016-01-01	ÁNCASH	Internet fijo	Otros	Solucionados	1
GILAT TO HOME PERÚ S.A.	2016-01-01	APURÍMAC	Internet fijo	Otros	Solucionados	1
GILAT TO HOME PERÚ S.A.	2016-01-01	AYACUCHO	Internet fijo	Otros	Solucionados	1
GILAT TO HOME PERÚ S.A.	2016-01-01	CUSCO	Internet fijo	Otros	Solucionados	1
GILAT TO HOME PERÚ S.A.	2016-01-01	PUNO	Internet fijo	Otros	Solucionados	1
INTERNEXA PERÚ S.A.	2016-01-01	AREQUIPA	Internet fijo	Servicio no operativo	Presentados	1
INTERNEXA PERÚ S.A.	2016-01-01	CUSCO	Internet fijo	Servicio no operativo	Presentados	1
INTERNEXA PERÚ S.A.	2016-01-01	PIURA	Internet fijo	Servicio no operativo	Presentados	1
OLO DEL PERÚ S.A.C.	2016-01-01	AREQUIPA	Internet fijo	Otros	Presentados	1
OLO DEL PERÚ S.A.C.	2016-01-01	LA LIBERTAD	Internet fijo	Otros	Presentados	1
SENCINET LATAM PERU S.A.C.	2016-01-01	LORETO	Internet fijo	Problemas de calidad	Presentados	1
WINNER SYSTEMS S.A.C.	2016-01-01	PIURA	Internet fijo	Otros	Presentados	1
AGUSTINA SERVICIOS GENERALES S.A.C.	2016-01-01	LA LIBERTAD	Internet fijo	Servicio no operativo	Presentados	2
AMERICATEL PERÚ S.A.	2016-01-01	PUNO	Internet fijo	Problemas de calidad	Presentados	2
AMERICATEL PERÚ S.A.	2016-01-01	CUSCO	Internet fijo	Servicio no operativo	Presentados	2
AMERICATEL PERÚ S.A.	2016-01-01	LA LIBERTAD	Internet fijo	Servicio no operativo	Presentados	2
AMERICATEL PERÚ S.A.	2016-01-01	LORETO	Internet fijo	Servicio no operativo	Presentados	2
AMERICATEL PERÚ S.A.	2016-01-01	TUMBES	Internet fijo	Servicio no operativo	Presentados	2
AMERICATEL PERÚ S.A.	2016-01-01	CUSCO	Internet fijo	Otros	Solucionados	2
AMERICATEL PERÚ S.A.	2016-01-01	PASCO	Internet fijo	Otros	Solucionados	2
AMERICATEL PERÚ S.A.	2016-01-01	TUMBES	Internet fijo	Otros	Solucionados	2
GILAT TO HOME PERÚ S.A.	2016-01-01	HUANCAVELICA	Internet fijo	Servicio no operativo	Presentados	2
GILAT TO HOME PERÚ S.A.	2016-01-01	HUANCAVELICA	Internet fijo	Otros	Solucionados	2
SENCINET LATAM PERU S.A.C.	2016-01-01	LIMA Y CALLAO	Internet fijo	Servicio no operativo	Presentados	2
VIA SATELITAL E.I.R.L.	2016-01-01	AREQUIPA	Internet fijo	Problemas de calidad	Presentados	2
VIA SATELITAL E.I.R.L.	2016-01-01	AREQUIPA	Internet fijo	Otros	Solucionados	2
WINNER SYSTEMS S.A.C.	2016-01-01	PIURA	Internet fijo	Servicio no operativo	Presentados	2
AMÉRICA MÓVIL PERÚ S.A.C.	2016-01-01	SAN MARTÍN	Internet fijo	Problemas de calidad	Presentados	3
AMÉRICA MÓVIL PERÚ S.A.C.	2016-01-01	LORETO	Internet fijo	Otros	Solucionados	3
AMÉRICA MÓVIL PERÚ S.A.C.	2016-01-01	SAN MARTÍN	Internet fijo	Otros	Solucionados	3
AMERICATEL PERÚ S.A.	2016-01-01	ÁNCASH	Internet fijo	Problemas de calidad	Presentados	3
AMERICATEL PERÚ S.A.	2016-01-01	AREQUIPA	Internet fijo	Otros	Solucionados	3
AMERICATEL PERÚ S.A.	2016-01-01	ICA	Internet fijo	Otros	Solucionados	3
CABLEVISION S.A.C.	2016-01-01	LIMA Y CALLAO	Internet fijo	Problemas de calidad	Presentados	3
CABLEVISION S.A.C.	2016-01-01	LIMA Y CALLAO	Internet fijo	Otros	Solucionados	3
DEMETRIO RIGOBERTO PICÓN ACOSTA	2016-01-01	LIMA Y CALLAO	Internet fijo	Otros	Solucionados	3
INTERNEXA PERÚ S.A.	2016-01-01	LAMBAYEQUE	Internet fijo	Servicio no operativo	Presentados	3
MOCHE INVERSIONES S.A.	2016-01-01	LIMA Y CALLAO	Internet fijo	Servicio no operativo	Presentados	3
INTERNEXA PERÚ S.A.	2016-01-01	JUNÍN	Internet fijo	Servicio no operativo	Presentados	4
OLO DEL PERÚ S.A.C.	2016-01-01	AREQUIPA	Internet fijo	Problemas de calidad	Presentados	4
AMÉRICA MÓVIL PERÚ S.A.C.	2016-01-01	LORETO	Internet fijo	Problemas de calidad	Presentados	5
AMERICATEL PERÚ S.A.	2016-01-01	AREQUIPA	Internet fijo	Problemas de calidad	Presentados	5
AMERICATEL PERÚ S.A.	2016-01-01	AREQUIPA	Internet fijo	Servicio no operativo	Presentados	5
OLO DEL PERÚ S.A.C.	2016-01-01	ICA	Internet fijo	Problemas de calidad	Presentados	5
OLO DEL PERÚ S.A.C.	2016-01-01	LAMBAYEQUE	Internet fijo	Problemas de calidad	Presentados	5
OLO DEL PERÚ S.A.C.	2016-01-01	AREQUIPA	Internet fijo	Otros	Solucionados	5
OLO DEL PERÚ S.A.C.	2016-01-01	ICA	Internet fijo	Otros	Solucionados	5
OLO DEL PERÚ S.A.C.	2016-01-01	LAMBAYEQUE	Internet fijo	Otros	Solucionados	5
WI-NET PERU S.A.C.	2016-01-01	LIMA Y CALLAO	Internet fijo	Servicio no operativo	Presentados	5
AGUSTINA SERVICIOS GENERALES S.A.C.	2016-01-01	LA LIBERTAD	Internet fijo	Problemas de calidad	Presentados	6
AMERICATEL PERÚ S.A.	2016-01-01	ICA	Internet fijo	Problemas de calidad	Presentados	6
AMERICATEL PERÚ S.A.	2016-01-01	LAMBAYEQUE	Internet fijo	Problemas de calidad	Presentados	6
GILAT TO HOME PERÚ S.A.	2016-01-01	LORETO	Internet fijo	Servicio no operativo	Presentados	6
GILAT TO HOME PERÚ S.A.	2016-01-01	LORETO	Internet fijo	Otros	Solucionados	6
TELEFÓNICA DEL PERÚ S.A.A.	2016-01-01	AMAZONAS	Internet fijo	Problemas de calidad	Presentados	6
AMERICATEL PERÚ S.A.	2016-01-01	LAMBAYEQUE	Internet fijo	Servicio no operativo	Presentados	7
AMERICATEL PERÚ S.A.	2016-01-01	LAMBAYEQUE	Internet fijo	Otros	Solucionados	7
TVS WIRELESS S.A.C.	2016-01-01	LIMA Y CALLAO	Internet fijo	Problemas de calidad	Presentados	7
TVS WIRELESS S.A.C.	2016-01-01	LIMA Y CALLAO	Internet fijo	Otros	Solucionados	7
OLO DEL PERÚ S.A.C.	2016-01-01	LA LIBERTAD	Internet fijo	Problemas de calidad	Presentados	9
TELEFÓNICA DEL PERÚ S.A.A.	2016-01-01	AMAZONAS	Internet fijo	Otros	Presentados	9
AMÉRICA MÓVIL PERÚ S.A.C.	2016-01-01	MOQUEGUA	Internet fijo	Otros	Solucionados	10
INTERNEXA PERÚ S.A.	2016-01-01	LIMA Y CALLAO	Internet fijo	Servicio no operativo	Presentados	10
OLO DEL PERÚ S.A.C.	2016-01-01	LA LIBERTAD	Internet fijo	Otros	Solucionados	10
RED INTERCABLE PERU S.A.C.	2016-01-01	JUNÍN	Internet fijo	Problemas de calidad	Presentados	12
RED INTERCABLE PERU S.A.C.	2016-01-01	JUNÍN	Internet fijo	Otros	Solucionados	12
MOCHE INVERSIONES S.A.	2016-01-01	LIMA Y CALLAO	Internet fijo	Problemas de calidad	Presentados	17
AMÉRICA MÓVIL PERÚ S.A.C.	2016-01-01	MOQUEGUA	Internet fijo	Problemas de calidad	Presentados	18
AMÉRICA MÓVIL PERÚ S.A.C.	2016-01-01	TUMBES	Internet fijo	Otros	Solucionados	19
MOCHE INVERSIONES S.A.	2016-01-01	LIMA Y CALLAO	Internet fijo	Otros	Solucionados	20
CONVERGIA PERÚ S.A.	2016-01-01	LIMA Y CALLAO	Internet fijo	Problemas de calidad	Presentados	21
TELEFÓNICA DEL PERÚ S.A.A.	2016-01-01	PASCO	Internet fijo	Otros	Presentados	23
WINNER SYSTEMS S.A.C.	2016-01-01	PIURA	Internet fijo	Problemas de calidad	Presentados	25
AMÉRICA MÓVIL PERÚ S.A.C.	2016-01-01	TUMBES	Internet fijo	Problemas de calidad	Presentados	28
WINNER SYSTEMS S.A.C.	2016-01-01	PIURA	Internet fijo	Otros	Solucionados	28
AMÉRICA MÓVIL PERÚ S.A.C.	2016-01-01	HUÁNUCO	Internet fijo	Otros	Solucionados	29
AMÉRICA MÓVIL PERÚ S.A.C.	2016-01-01	MADRE DE DIOS	Internet fijo	Otros	Solucionados	29
AMÉRICA MÓVIL PERÚ S.A.C.	2016-01-01	UCAYALI	Internet fijo	Otros	Solucionados	29
AMÉRICA MÓVIL PERÚ S.A.C.	2016-01-01	PUNO	Internet fijo	Otros	Solucionados	34
AMÉRICA MÓVIL PERÚ S.A.C.	2016-01-01	CUSCO	Internet fijo	Otros	Solucionados	40
TELEFÓNICA DEL PERÚ S.A.A.	2016-01-01	HUANCAVELICA	Internet fijo	Otros	Presentados	43
MULTISERVICIOS DE TELECOMUNICACIONES SATELITAL E.I.R.L.	2016-01-01	LIMA Y CALLAO	Internet fijo	Servicio no operativo	Presentados	45
MULTISERVICIOS DE TELECOMUNICACIONES SATELITAL E.I.R.L.	2016-01-01	LIMA Y CALLAO	Internet fijo	Otros	Solucionados	45
AMÉRICA MÓVIL PERÚ S.A.C.	2016-01-01	ÁNCASH	Internet fijo	Otros	Solucionados	47
AMÉRICA MÓVIL PERÚ S.A.C.	2016-01-01	CAJAMARCA	Internet fijo	Otros	Solucionados	48
TELEFÓNICA DEL PERÚ S.A.A.	2016-01-01	AMAZONAS	Internet fijo	Servicio no operativo	Presentados	50
AMÉRICA MÓVIL PERÚ S.A.C.	2016-01-01	PUNO	Internet fijo	Problemas de calidad	Presentados	51
TELEFÓNICA DEL PERÚ S.A.A.	2016-01-01	MADRE DE DIOS	Internet fijo	Problemas de calidad	Presentados	54
TELEFÓNICA DEL PERÚ S.A.A.	2016-01-01	PASCO	Internet fijo	Problemas de calidad	Presentados	55
TELEFÓNICA DEL PERÚ S.A.A.	2016-01-01	HUANCAVELICA	Internet fijo	Problemas de calidad	Presentados	56
AMÉRICA MÓVIL PERÚ S.A.C.	2016-01-01	HUÁNUCO	Internet fijo	Problemas de calidad	Presentados	57
TELEFÓNICA DEL PERÚ S.A.A.	2016-01-01	MADRE DE DIOS	Internet fijo	Otros	Presentados	57
TELEFÓNICA DEL PERÚ S.A.A.	2016-01-01	APURÍMAC	Internet fijo	Otros	Presentados	58
AMÉRICA MÓVIL PERÚ S.A.C.	2016-01-01	MADRE DE DIOS	Internet fijo	Problemas de calidad	Presentados	59
OLO DEL PERÚ S.A.C.	2016-01-01	LIMA Y CALLAO	Internet fijo	Servicio no operativo	Presentados	62
OLO DEL PERÚ S.A.C.	2016-01-01	LIMA Y CALLAO	Internet fijo	Otros	Presentados	62
TELEFÓNICA DEL PERÚ S.A.A.	2016-01-01	AMAZONAS	Internet fijo	Otros	Solucionados	65
AMÉRICA MÓVIL PERÚ S.A.C.	2016-01-01	JUNÍN	Internet fijo	Otros	Solucionados	67
AMÉRICA MÓVIL PERÚ S.A.C.	2016-01-01	ICA	Internet fijo	Otros	Solucionados	70
AMÉRICA MÓVIL PERÚ S.A.C.	2016-01-01	TACNA	Internet fijo	Otros	Solucionados	72
AMÉRICA MÓVIL PERÚ S.A.C.	2016-01-01	ÁNCASH	Internet fijo	Problemas de calidad	Presentados	80
AMÉRICA MÓVIL PERÚ S.A.C.	2016-01-01	CUSCO	Internet fijo	Problemas de calidad	Presentados	81
AMÉRICA MÓVIL PERÚ S.A.C.	2016-01-01	UCAYALI	Internet fijo	Problemas de calidad	Presentados	81
TELEFÓNICA DEL PERÚ S.A.A.	2016-01-01	APURÍMAC	Internet fijo	Problemas de calidad	Presentados	84
TELEFÓNICA DEL PERÚ S.A.A.	2016-01-01	TUMBES	Internet fijo	Problemas de calidad	Presentados	86
AMÉRICA MÓVIL PERÚ S.A.C.	2016-01-01	CAJAMARCA	Internet fijo	Problemas de calidad	Presentados	87
TELEFÓNICA DEL PERÚ S.A.A.	2016-01-01	TUMBES	Internet fijo	Otros	Presentados	90
STAR GLOBAL COM S.A.C.	2016-01-01	TACNA	Internet fijo	Problemas de calidad	Presentados	92
TELEFÓNICA DEL PERÚ S.A.A.	2016-01-01	HUÁNUCO	Internet fijo	Otros	Presentados	97
TELEFÓNICA DEL PERÚ S.A.A.	2016-01-01	TACNA	Internet fijo	Otros	Presentados	99
TELEFÓNICA DEL PERÚ S.A.A.	2016-01-01	TACNA	Internet fijo	Problemas de calidad	Presentados	101
TELEFÓNICA DEL PERÚ S.A.A.	2016-01-01	MOQUEGUA	Internet fijo	Otros	Presentados	111
AMÉRICA MÓVIL PERÚ S.A.C.	2016-01-01	JUNÍN	Internet fijo	Problemas de calidad	Presentados	114
TELEFÓNICA DEL PERÚ S.A.A.	2016-01-01	AYACUCHO	Internet fijo	Otros	Presentados	117
TELEFÓNICA DEL PERÚ S.A.A.	2016-01-01	CAJAMARCA	Internet fijo	Otros	Presentados	117
AMÉRICA MÓVIL PERÚ S.A.C.	2016-01-01	TACNA	Internet fijo	Problemas de calidad	Presentados	118
TELEFÓNICA DEL PERÚ S.A.A.	2016-01-01	HUÁNUCO	Internet fijo	Problemas de calidad	Presentados	119
AMÉRICA MÓVIL PERÚ S.A.C.	2016-01-01	ICA	Internet fijo	Problemas de calidad	Presentados	121
TELEFÓNICA DEL PERÚ S.A.A.	2016-01-01	MOQUEGUA	Internet fijo	Problemas de calidad	Presentados	124
TELEFÓNICA DEL PERÚ S.A.A.	2016-01-01	LORETO	Internet fijo	Problemas de calidad	Presentados	126
AMÉRICA MÓVIL PERÚ S.A.C.	2016-01-01	PIURA	Internet fijo	Otros	Solucionados	127
AMÉRICA MÓVIL PERÚ S.A.C.	2016-01-01	AREQUIPA	Internet fijo	Otros	Solucionados	129
TELEFÓNICA DEL PERÚ S.A.A.	2016-01-01	PUNO	Internet fijo	Otros	Presentados	146
AMÉRICA MÓVIL PERÚ S.A.C.	2016-01-01	LAMBAYEQUE	Internet fijo	Otros	Solucionados	150
TELEFÓNICA DEL PERÚ S.A.A.	2016-01-01	CAJAMARCA	Internet fijo	Problemas de calidad	Presentados	152
AMÉRICA MÓVIL PERÚ S.A.C.	2016-01-01	LA LIBERTAD	Internet fijo	Otros	Solucionados	165
TELEFÓNICA DEL PERÚ S.A.A.	2016-01-01	UCAYALI	Internet fijo	Problemas de calidad	Presentados	169
TELEFÓNICA DEL PERÚ S.A.A.	2016-01-01	SAN MARTÍN	Internet fijo	Otros	Presentados	189
TELEFÓNICA DEL PERÚ S.A.A.	2016-01-01	AYACUCHO	Internet fijo	Problemas de calidad	Presentados	201
TELEFÓNICA DEL PERÚ S.A.A.	2016-01-01	UCAYALI	Internet fijo	Otros	Presentados	203
AMÉRICA MÓVIL PERÚ S.A.C.	2016-01-01	AREQUIPA	Internet fijo	Problemas de calidad	Presentados	233
AMÉRICA MÓVIL PERÚ S.A.C.	2016-01-01	PIURA	Internet fijo	Problemas de calidad	Presentados	236
TELEFÓNICA DEL PERÚ S.A.A.	2016-01-01	SAN MARTÍN	Internet fijo	Problemas de calidad	Presentados	240
TELEFÓNICA DEL PERÚ S.A.A.	2016-01-01	PUNO	Internet fijo	Problemas de calidad	Presentados	251
AMÉRICA MÓVIL PERÚ S.A.C.	2016-01-01	LAMBAYEQUE	Internet fijo	Problemas de calidad	Presentados	277
TELEFÓNICA DEL PERÚ S.A.A.	2016-01-01	PASCO	Internet fijo	Servicio no operativo	Presentados	296
TELEFÓNICA DEL PERÚ S.A.A.	2016-01-01	LORETO	Internet fijo	Otros	Presentados	303
TELEFÓNICA DEL PERÚ S.A.A.	2016-01-01	MADRE DE DIOS	Internet fijo	Servicio no operativo	Presentados	325
AMERICATEL PERÚ S.A.	2016-01-01	LIMA Y CALLAO	Internet fijo	Problemas de calidad	Presentados	335
TELEFÓNICA DEL PERÚ S.A.A.	2016-01-01	JUNÍN	Internet fijo	Otros	Presentados	348
STAR GLOBAL COM S.A.C.	2016-01-01	AREQUIPA	Internet fijo	Problemas de calidad	Presentados	352
TELEFÓNICA DEL PERÚ S.A.A.	2016-01-01	PASCO	Internet fijo	Otros	Solucionados	366
TELEFÓNICA DEL PERÚ S.A.A.	2016-01-01	CUSCO	Internet fijo	Otros	Presentados	380
TELEFÓNICA DEL PERÚ S.A.A.	2016-01-01	HUANCAVELICA	Internet fijo	Servicio no operativo	Presentados	396
TELEFÓNICA DEL PERÚ S.A.A.	2016-01-01	ICA	Internet fijo	Problemas de calidad	Presentados	410
TELEFÓNICA DEL PERÚ S.A.A.	2016-01-01	MADRE DE DIOS	Internet fijo	Otros	Solucionados	425
AMERICATEL PERÚ S.A.	2016-01-01	LIMA Y CALLAO	Internet fijo	Otros	Solucionados	443
TELEFÓNICA DEL PERÚ S.A.A.	2016-01-01	JUNÍN	Internet fijo	Problemas de calidad	Presentados	453
AMÉRICA MÓVIL PERÚ S.A.C.	2016-01-01	LA LIBERTAD	Internet fijo	Problemas de calidad	Presentados	456
TELEFÓNICA DEL PERÚ S.A.A.	2016-01-01	ÁNCASH	Internet fijo	Problemas de calidad	Presentados	472
TELEFÓNICA DEL PERÚ S.A.A.	2016-01-01	HUANCAVELICA	Internet fijo	Otros	Solucionados	490
TELEFÓNICA DEL PERÚ S.A.A.	2016-01-01	TUMBES	Internet fijo	Servicio no operativo	Presentados	497
TELEFÓNICA DEL PERÚ S.A.A.	2016-01-01	ICA	Internet fijo	Otros	Presentados	505
TELEFÓNICA DEL PERÚ S.A.A.	2016-01-01	ÁNCASH	Internet fijo	Otros	Presentados	521
AMERICATEL PERÚ S.A.	2016-01-01	LIMA Y CALLAO	Internet fijo	Servicio no operativo	Presentados	528
TELEFÓNICA DEL PERÚ S.A.A.	2016-01-01	CUSCO	Internet fijo	Problemas de calidad	Presentados	535
TELEFÓNICA DEL PERÚ S.A.A.	2016-01-01	PIURA	Internet fijo	Problemas de calidad	Presentados	547
TELEFÓNICA DEL PERÚ S.A.A.	2016-01-01	AREQUIPA	Internet fijo	Otros	Presentados	548
TELEFÓNICA DEL PERÚ S.A.A.	2016-01-01	LAMBAYEQUE	Internet fijo	Problemas de calidad	Presentados	566
TELEFÓNICA DEL PERÚ S.A.A.	2016-01-01	PIURA	Internet fijo	Otros	Presentados	670
TELEFÓNICA DEL PERÚ S.A.A.	2016-01-01	TUMBES	Internet fijo	Otros	Solucionados	670
TELEFÓNICA DEL PERÚ S.A.A.	2016-01-01	LAMBAYEQUE	Internet fijo	Otros	Presentados	680
TELEFÓNICA DEL PERÚ S.A.A.	2016-01-01	HUÁNUCO	Internet fijo	Servicio no operativo	Presentados	684
TELEFÓNICA DEL PERÚ S.A.A.	2016-01-01	AREQUIPA	Internet fijo	Problemas de calidad	Presentados	734
TELEFÓNICA DEL PERÚ S.A.A.	2016-01-01	APURÍMAC	Internet fijo	Servicio no operativo	Presentados	750
TELEFÓNICA DEL PERÚ S.A.A.	2016-01-01	TACNA	Internet fijo	Servicio no operativo	Presentados	759
TELEFÓNICA DEL PERÚ S.A.A.	2016-01-01	LA LIBERTAD	Internet fijo	Problemas de calidad	Presentados	774
TELEFÓNICA DEL PERÚ S.A.A.	2016-01-01	MOQUEGUA	Internet fijo	Servicio no operativo	Presentados	824
TELEFÓNICA DEL PERÚ S.A.A.	2016-01-01	APURÍMAC	Internet fijo	Otros	Solucionados	882
TELEFÓNICA DEL PERÚ S.A.A.	2016-01-01	HUÁNUCO	Internet fijo	Otros	Solucionados	887
TELEFÓNICA DEL PERÚ S.A.A.	2016-01-01	LA LIBERTAD	Internet fijo	Otros	Presentados	934
TELEFÓNICA DEL PERÚ S.A.A.	2016-01-01	TACNA	Internet fijo	Otros	Solucionados	944
TELEFÓNICA DEL PERÚ S.A.A.	2016-01-01	MOQUEGUA	Internet fijo	Otros	Solucionados	1044
TELEFÓNICA DEL PERÚ S.A.A.	2016-01-01	LORETO	Internet fijo	Servicio no operativo	Presentados	1075
TELEFÓNICA DEL PERÚ S.A.A.	2016-01-01	UCAYALI	Internet fijo	Servicio no operativo	Presentados	1229
TELEFÓNICA DEL PERÚ S.A.A.	2016-01-01	AYACUCHO	Internet fijo	Servicio no operativo	Presentados	1357
TELEFÓNICA DEL PERÚ S.A.A.	2016-01-01	LORETO	Internet fijo	Otros	Solucionados	1499
TELEFÓNICA DEL PERÚ S.A.A.	2016-01-01	UCAYALI	Internet fijo	Otros	Solucionados	1569
TELEFÓNICA DEL PERÚ S.A.A.	2016-01-01	PUNO	Internet fijo	Servicio no operativo	Presentados	1590
TELEFÓNICA DEL PERÚ S.A.A.	2016-01-01	AYACUCHO	Internet fijo	Otros	Solucionados	1657
TELEFÓNICA DEL PERÚ S.A.A.	2016-01-01	SAN MARTÍN	Internet fijo	Servicio no operativo	Presentados	1860
TELEFÓNICA DEL PERÚ S.A.A.	2016-01-01	PUNO	Internet fijo	Otros	Solucionados	1964
TELEFÓNICA DEL PERÚ S.A.A.	2016-01-01	CAJAMARCA	Internet fijo	Servicio no operativo	Presentados	1995
TELEFÓNICA DEL PERÚ S.A.A.	2016-01-01	ÁNCASH	Internet fijo	Servicio no operativo	Presentados	2044
OLO DEL PERÚ S.A.C.	2016-01-01	LIMA Y CALLAO	Internet fijo	Problemas de calidad	Presentados	2219
TELEFÓNICA DEL PERÚ S.A.A.	2016-01-01	CAJAMARCA	Internet fijo	Otros	Solucionados	2237
TELEFÓNICA DEL PERÚ S.A.A.	2016-01-01	SAN MARTÍN	Internet fijo	Otros	Solucionados	2270
OLO DEL PERÚ S.A.C.	2016-01-01	LIMA Y CALLAO	Internet fijo	Otros	Solucionados	2343
AMÉRICA MÓVIL PERÚ S.A.C.	2016-01-01	LIMA Y CALLAO	Internet fijo	Otros	Solucionados	2381
TELEFÓNICA DEL PERÚ S.A.A.	2016-01-01	ÁNCASH	Internet fijo	Otros	Solucionados	3005
TELEFÓNICA DEL PERÚ S.A.A.	2016-01-01	JUNÍN	Internet fijo	Servicio no operativo	Presentados	3309
TELEFÓNICA DEL PERÚ S.A.A.	2016-01-01	ICA	Internet fijo	Servicio no operativo	Presentados	3504
TELEFÓNICA DEL PERÚ S.A.A.	2016-01-01	LAMBAYEQUE	Internet fijo	Servicio no operativo	Presentados	3721
TELEFÓNICA DEL PERÚ S.A.A.	2016-01-01	PIURA	Internet fijo	Servicio no operativo	Presentados	3923
TELEFÓNICA DEL PERÚ S.A.A.	2016-01-01	JUNÍN	Internet fijo	Otros	Solucionados	4053
TELEFÓNICA DEL PERÚ S.A.A.	2016-01-01	CUSCO	Internet fijo	Servicio no operativo	Presentados	4302
TELEFÓNICA DEL PERÚ S.A.A.	2016-01-01	ICA	Internet fijo	Otros	Solucionados	4366
TELEFÓNICA DEL PERÚ S.A.A.	2016-01-01	LA LIBERTAD	Internet fijo	Servicio no operativo	Presentados	4695
TELEFÓNICA DEL PERÚ S.A.A.	2016-01-01	LAMBAYEQUE	Internet fijo	Otros	Solucionados	4827
TELEFÓNICA DEL PERÚ S.A.A.	2016-01-01	PIURA	Internet fijo	Otros	Solucionados	5005
TELEFÓNICA DEL PERÚ S.A.A.	2016-01-01	CUSCO	Internet fijo	Otros	Solucionados	5082
AMÉRICA MÓVIL PERÚ S.A.C.	2016-01-01	LIMA Y CALLAO	Internet fijo	Problemas de calidad	Presentados	5757
TELEFÓNICA DEL PERÚ S.A.A.	2016-01-01	LA LIBERTAD	Internet fijo	Otros	Solucionados	6188
TELEFÓNICA DEL PERÚ S.A.A.	2016-01-01	AREQUIPA	Internet fijo	Servicio no operativo	Presentados	6243
TELEFÓNICA DEL PERÚ S.A.A.	2016-01-01	AREQUIPA	Internet fijo	Otros	Solucionados	7456
TELEFÓNICA DEL PERÚ S.A.A.	2016-01-01	LIMA Y CALLAO	Internet fijo	Problemas de calidad	Presentados	8904
TELEFÓNICA DEL PERÚ S.A.A.	2016-01-01	LIMA Y CALLAO	Internet fijo	Otros	Presentados	17534
TELEFÓNICA DEL PERÚ S.A.A.	2016-01-01	LIMA Y CALLAO	Internet fijo	Servicio no operativo	Presentados	50097
TELEFÓNICA DEL PERÚ S.A.A.	2016-01-01	LIMA Y CALLAO	Internet fijo	Otros	Solucionados	73873
AMÉRICA MÓVIL PERÚ S.A.C.	2016-01-01	LORETO	Telefonía fija	Otros	Solucionados	1
AMÉRICA MÓVIL PERÚ S.A.C.	2016-01-01	PASCO	Telefonía fija	Otros	Solucionados	1
AMERICATEL PERÚ S.A.	2016-01-01	LA LIBERTAD	Telefonía fija	Servicio no operativo	Presentados	1
AMERICATEL PERÚ S.A.	2016-01-01	LA LIBERTAD	Telefonía fija	Otros	Solucionados	1
AMERICATEL PERÚ S.A.	2016-01-01	LIMA Y CALLAO	Telefonía fija	Problemas de calidad	Presentados	1
AMERICATEL PERÚ S.A.	2016-01-01	ÁNCASH	Telefonía fija	Servicio no operativo	Presentados	1
AMERICATEL PERÚ S.A.	2016-01-01	AREQUIPA	Telefonía fija	Servicio no operativo	Presentados	1
AMERICATEL PERÚ S.A.	2016-01-01	PIURA	Telefonía fija	Servicio no operativo	Presentados	1
AMERICATEL PERÚ S.A.	2016-01-01	PIURA	Telefonía fija	Otros	Solucionados	1
GILAT TO HOME PERÚ S.A.	2016-01-01	AMAZONAS	Telefonía fija	Problemas de calidad	Presentados	1
GILAT TO HOME PERÚ S.A.	2016-01-01	PASCO	Telefonía fija	Problemas de calidad	Presentados	1
GILAT TO HOME PERÚ S.A.	2016-01-01	UCAYALI	Telefonía fija	Problemas de calidad	Presentados	1
GILAT TO HOME PERÚ S.A.	2016-01-01	AYACUCHO	Telefonía fija	Servicio no operativo	Presentados	1
GILAT TO HOME PERÚ S.A.	2016-01-01	CUSCO	Telefonía fija	Servicio no operativo	Presentados	1
GILAT TO HOME PERÚ S.A.	2016-01-01	LIMA Y CALLAO	Telefonía fija	Servicio no operativo	Presentados	1
AMÉRICA MÓVIL PERÚ S.A.C.	2016-01-01	AYACUCHO	Telefonía fija	Problemas de calidad	Presentados	2
COMPAÑÍA TELEFÓNICA ANDINA S.A.	2016-01-01	LIMA Y CALLAO	Telefonía fija	Otros	Presentados	2
COMPAÑÍA TELEFÓNICA ANDINA S.A.	2016-01-01	LIMA Y CALLAO	Telefonía fija	Otros	Solucionados	2
GILAT TO HOME PERÚ S.A.	2016-01-01	PUNO	Telefonía fija	Problemas de calidad	Presentados	2
AMÉRICA MÓVIL PERÚ S.A.C.	2016-01-01	LORETO	Telefonía fija	Problemas de calidad	Presentados	3
AMÉRICA MÓVIL PERÚ S.A.C.	2016-01-01	PASCO	Telefonía fija	Problemas de calidad	Presentados	3
MOCHE INVERSIONES S.A.	2016-01-01	LIMA Y CALLAO	Telefonía fija	Servicio no operativo	Presentados	3
NETLINE PERÚ S.A.	2016-01-01	LIMA Y CALLAO	Telefonía fija	Servicio no operativo	Presentados	3
VELATEL PERÚ S.A.C.	2016-01-01	LIMA Y CALLAO	Telefonía fija	Problemas de calidad	Presentados	3
VELATEL PERÚ S.A.C.	2016-01-01	LIMA Y CALLAO	Telefonía fija	Otros	Solucionados	3
GILAT TO HOME PERÚ S.A.	2016-01-01	LORETO	Telefonía fija	Servicio no operativo	Presentados	4
GILAT TO HOME PERÚ S.A.	2016-01-01	PUNO	Telefonía fija	Servicio no operativo	Presentados	4
MOCHE INVERSIONES S.A.	2016-01-01	LIMA Y CALLAO	Telefonía fija	Otros	Presentados	4
VELATEL PERÚ S.A.C.	2016-01-01	LIMA Y CALLAO	Telefonía fija	Problemas de calidad	Presentados	4
VELATEL PERÚ S.A.C.	2016-01-01	LIMA Y CALLAO	Telefonía fija	Otros	Solucionados	4
GILAT TO HOME PERÚ S.A.	2016-01-01	LORETO	Telefonía fija	Problemas de calidad	Presentados	6
WINNER SYSTEMS S.A.C.	2016-01-01	PIURA	Telefonía fija	Problemas de calidad	Presentados	6
WINNER SYSTEMS S.A.C.	2016-01-01	PIURA	Telefonía fija	Otros	Solucionados	6
MOCHE INVERSIONES S.A.	2016-01-01	LIMA Y CALLAO	Telefonía fija	Otros	Solucionados	7
AMERICATEL PERÚ S.A.	2016-01-01	LIMA Y CALLAO	Telefonía fija	Otros	Solucionados	11
AMÉRICA MÓVIL PERÚ S.A.C.	2016-01-01	MOQUEGUA	Telefonía fija	Otros	Solucionados	19
AMERICATEL PERÚ S.A.	2016-01-01	LIMA Y CALLAO	Telefonía fija	Servicio no operativo	Presentados	22
TELEFÓNICA DEL PERÚ S.A.A.	2016-01-01	AMAZONAS	Telefonía fija	Problemas de calidad	Presentados	24
NETLINE PERÚ S.A.	2016-01-01	LIMA Y CALLAO	Telefonía fija	Problemas de calidad	Presentados	30
AMÉRICA MÓVIL PERÚ S.A.C.	2016-01-01	TUMBES	Telefonía fija	Otros	Solucionados	31
AMÉRICA MÓVIL PERÚ S.A.C.	2016-01-01	MOQUEGUA	Telefonía fija	Problemas de calidad	Presentados	34
AMÉRICA MÓVIL PERÚ S.A.C.	2016-01-01	UCAYALI	Telefonía fija	Otros	Solucionados	39
AMÉRICA MÓVIL PERÚ S.A.C.	2016-01-01	HUÁNUCO	Telefonía fija	Otros	Solucionados	42
AMÉRICA MÓVIL PERÚ S.A.C.	2016-01-01	PUNO	Telefonía fija	Otros	Solucionados	43
CONVERGIA PERÚ S.A.	2016-01-01	LIMA Y CALLAO	Telefonía fija	Problemas de calidad	Presentados	43
AMÉRICA MÓVIL PERÚ S.A.C.	2016-01-01	TUMBES	Telefonía fija	Problemas de calidad	Presentados	53
AMÉRICA MÓVIL PERÚ S.A.C.	2016-01-01	MADRE DE DIOS	Telefonía fija	Otros	Solucionados	71
AMÉRICA MÓVIL PERÚ S.A.C.	2016-01-01	ÁNCASH	Telefonía fija	Otros	Solucionados	72
AMÉRICA MÓVIL PERÚ S.A.C.	2016-01-01	PUNO	Telefonía fija	Problemas de calidad	Presentados	74
AMÉRICA MÓVIL PERÚ S.A.C.	2016-01-01	UCAYALI	Telefonía fija	Problemas de calidad	Presentados	74
TELEFÓNICA DEL PERÚ S.A.A.	2016-01-01	AMAZONAS	Telefonía fija	Servicio no operativo	Presentados	75
AMÉRICA MÓVIL PERÚ S.A.C.	2016-01-01	CAJAMARCA	Telefonía fija	Otros	Solucionados	76
AMÉRICA MÓVIL PERÚ S.A.C.	2016-01-01	HUÁNUCO	Telefonía fija	Problemas de calidad	Presentados	79
AMÉRICA MÓVIL PERÚ S.A.C.	2016-01-01	ICA	Telefonía fija	Otros	Solucionados	94
TELEFÓNICA DEL PERÚ S.A.A.	2016-01-01	MADRE DE DIOS	Telefonía fija	Problemas de calidad	Presentados	98
TELEFÓNICA DEL PERÚ S.A.A.	2016-01-01	AMAZONAS	Telefonía fija	Otros	Solucionados	99
TELEFÓNICA DEL PERÚ S.A.A.	2016-01-01	HUANCAVELICA	Telefonía fija	Problemas de calidad	Presentados	100
AMÉRICA MÓVIL PERÚ S.A.C.	2016-01-01	MADRE DE DIOS	Telefonía fija	Problemas de calidad	Presentados	122
TELEFÓNICA DEL PERÚ S.A.A.	2016-01-01	PASCO	Telefonía fija	Problemas de calidad	Presentados	126
AMÉRICA MÓVIL PERÚ S.A.C.	2016-01-01	ÁNCASH	Telefonía fija	Problemas de calidad	Presentados	127
AMÉRICA MÓVIL PERÚ S.A.C.	2016-01-01	CUSCO	Telefonía fija	Otros	Solucionados	127
AMÉRICA MÓVIL PERÚ S.A.C.	2016-01-01	TACNA	Telefonía fija	Otros	Solucionados	138
AMÉRICA MÓVIL PERÚ S.A.C.	2016-01-01	CAJAMARCA	Telefonía fija	Problemas de calidad	Presentados	147
AMÉRICA MÓVIL PERÚ S.A.C.	2016-01-01	ICA	Telefonía fija	Problemas de calidad	Presentados	164
TELEFÓNICA DEL PERÚ S.A.A.	2016-01-01	APURÍMAC	Telefonía fija	Problemas de calidad	Presentados	172
AMERICATEL PERÚ S.A.	2016-01-01	LIMA Y CALLAO	Telefonía fija	Problemas de calidad	Presentados	176
TELEFÓNICA DEL PERÚ S.A.A.	2016-01-01	TUMBES	Telefonía fija	Problemas de calidad	Presentados	178
TELEFÓNICA DEL PERÚ S.A.A.	2016-01-01	PASCO	Telefonía fija	Otros	Solucionados	188
TELEFÓNICA DEL PERÚ S.A.A.	2016-01-01	MOQUEGUA	Telefonía fija	Problemas de calidad	Presentados	209
AMÉRICA MÓVIL PERÚ S.A.C.	2016-01-01	CUSCO	Telefonía fija	Problemas de calidad	Presentados	211
AMÉRICA MÓVIL PERÚ S.A.C.	2016-01-01	JUNÍN	Telefonía fija	Otros	Solucionados	227
AMÉRICA MÓVIL PERÚ S.A.C.	2016-01-01	LAMBAYEQUE	Telefonía fija	Otros	Solucionados	249
AMÉRICA MÓVIL PERÚ S.A.C.	2016-01-01	TACNA	Telefonía fija	Problemas de calidad	Presentados	261
TELEFÓNICA DEL PERÚ S.A.A.	2016-01-01	PASCO	Telefonía fija	Servicio no operativo	Presentados	265
AMERICATEL PERÚ S.A.	2016-01-01	LIMA Y CALLAO	Telefonía fija	Servicio no operativo	Presentados	277
TELEFÓNICA DEL PERÚ S.A.A.	2016-01-01	TACNA	Telefonía fija	Problemas de calidad	Presentados	279
AMÉRICA MÓVIL PERÚ S.A.C.	2016-01-01	AREQUIPA	Telefonía fija	Otros	Solucionados	314
AMÉRICA MÓVIL PERÚ S.A.C.	2016-01-01	PIURA	Telefonía fija	Otros	Solucionados	317
TELEFÓNICA DEL PERÚ S.A.A.	2016-01-01	HUÁNUCO	Telefonía fija	Problemas de calidad	Presentados	352
AMERICATEL PERÚ S.A.	2016-01-01	LIMA Y CALLAO	Telefonía fija	Otros	Solucionados	359
AMÉRICA MÓVIL PERÚ S.A.C.	2016-01-01	LA LIBERTAD	Telefonía fija	Otros	Solucionados	364
TELEFÓNICA DEL PERÚ S.A.A.	2016-01-01	MADRE DE DIOS	Telefonía fija	Servicio no operativo	Presentados	370
AMÉRICA MÓVIL PERÚ S.A.C.	2016-01-01	JUNÍN	Telefonía fija	Problemas de calidad	Presentados	380
TELEFÓNICA DEL PERÚ S.A.A.	2016-01-01	AYACUCHO	Telefonía fija	Problemas de calidad	Presentados	406
TELEFÓNICA DEL PERÚ S.A.A.	2016-01-01	HUANCAVELICA	Telefonía fija	Servicio no operativo	Presentados	416
AMÉRICA MÓVIL PERÚ S.A.C.	2016-01-01	LAMBAYEQUE	Telefonía fija	Problemas de calidad	Presentados	419
TELEFÓNICA DEL PERÚ S.A.A.	2016-01-01	MADRE DE DIOS	Telefonía fija	Otros	Solucionados	468
TELEFÓNICA DEL PERÚ S.A.A.	2016-01-01	PUNO	Telefonía fija	Problemas de calidad	Presentados	483
AMÉRICA MÓVIL PERÚ S.A.C.	2016-01-01	AREQUIPA	Telefonía fija	Problemas de calidad	Presentados	501
TELEFÓNICA DEL PERÚ S.A.A.	2016-01-01	HUANCAVELICA	Telefonía fija	Otros	Solucionados	516
TELEFÓNICA DEL PERÚ S.A.A.	2016-01-01	UCAYALI	Telefonía fija	Problemas de calidad	Presentados	563
TELEFÓNICA DEL PERÚ S.A.A.	2016-01-01	TUMBES	Telefonía fija	Servicio no operativo	Presentados	577
TELEFÓNICA DEL PERÚ S.A.A.	2016-01-01	HUÁNUCO	Telefonía fija	Servicio no operativo	Presentados	603
TELEFÓNICA DEL PERÚ S.A.A.	2016-01-01	CAJAMARCA	Telefonía fija	Problemas de calidad	Presentados	637
AMÉRICA MÓVIL PERÚ S.A.C.	2016-01-01	PIURA	Telefonía fija	Problemas de calidad	Presentados	654
TELEFÓNICA DEL PERÚ S.A.A.	2016-01-01	SAN MARTÍN	Telefonía fija	Problemas de calidad	Presentados	728
TELEFÓNICA DEL PERÚ S.A.A.	2016-01-01	LORETO	Telefonía fija	Problemas de calidad	Presentados	742
TELEFÓNICA DEL PERÚ S.A.A.	2016-01-01	APURÍMAC	Telefonía fija	Servicio no operativo	Presentados	742
TELEFÓNICA DEL PERÚ S.A.A.	2016-01-01	TACNA	Telefonía fija	Servicio no operativo	Presentados	754
TELEFÓNICA DEL PERÚ S.A.A.	2016-01-01	TUMBES	Telefonía fija	Otros	Solucionados	755
AMÉRICA MÓVIL PERÚ S.A.C.	2016-01-01	LA LIBERTAD	Telefonía fija	Problemas de calidad	Presentados	809
TELEFÓNICA DEL PERÚ S.A.A.	2016-01-01	MOQUEGUA	Telefonía fija	Servicio no operativo	Presentados	882
TELEFÓNICA DEL PERÚ S.A.A.	2016-01-01	APURÍMAC	Telefonía fija	Otros	Solucionados	886
TELEFÓNICA DEL PERÚ S.A.A.	2016-01-01	HUÁNUCO	Telefonía fija	Otros	Solucionados	955
TELEFÓNICA DEL PERÚ S.A.A.	2016-01-01	TACNA	Telefonía fija	Otros	Solucionados	1033
TELEFÓNICA DEL PERÚ S.A.A.	2016-01-01	ÁNCASH	Telefonía fija	Problemas de calidad	Presentados	1062
TELEFÓNICA DEL PERÚ S.A.A.	2016-01-01	MOQUEGUA	Telefonía fija	Otros	Solucionados	1091
TELEFÓNICA DEL PERÚ S.A.A.	2016-01-01	LORETO	Telefonía fija	Servicio no operativo	Presentados	1097
TELEFÓNICA DEL PERÚ S.A.A.	2016-01-01	UCAYALI	Telefonía fija	Servicio no operativo	Presentados	1212
TELEFÓNICA DEL PERÚ S.A.A.	2016-01-01	CUSCO	Telefonía fija	Problemas de calidad	Presentados	1346
TELEFÓNICA DEL PERÚ S.A.A.	2016-01-01	AYACUCHO	Telefonía fija	Servicio no operativo	Presentados	1346
TELEFÓNICA DEL PERÚ S.A.A.	2016-01-01	PIURA	Telefonía fija	Problemas de calidad	Presentados	1551
TELEFÓNICA DEL PERÚ S.A.A.	2016-01-01	PUNO	Telefonía fija	Servicio no operativo	Presentados	1566
TELEFÓNICA DEL PERÚ S.A.A.	2016-01-01	JUNÍN	Telefonía fija	Problemas de calidad	Presentados	1636
TELEFÓNICA DEL PERÚ S.A.A.	2016-01-01	ICA	Telefonía fija	Problemas de calidad	Presentados	1637
TELEFÓNICA DEL PERÚ S.A.A.	2016-01-01	CAJAMARCA	Telefonía fija	Servicio no operativo	Presentados	1703
TELEFÓNICA DEL PERÚ S.A.A.	2016-01-01	AYACUCHO	Telefonía fija	Otros	Solucionados	1716
TELEFÓNICA DEL PERÚ S.A.A.	2016-01-01	UCAYALI	Telefonía fija	Otros	Solucionados	1750
TELEFÓNICA DEL PERÚ S.A.A.	2016-01-01	SAN MARTÍN	Telefonía fija	Servicio no operativo	Presentados	1761
TELEFÓNICA DEL PERÚ S.A.A.	2016-01-01	LORETO	Telefonía fija	Otros	Solucionados	1834
TELEFÓNICA DEL PERÚ S.A.A.	2016-01-01	LAMBAYEQUE	Telefonía fija	Problemas de calidad	Presentados	1871
TELEFÓNICA DEL PERÚ S.A.A.	2016-01-01	LA LIBERTAD	Telefonía fija	Problemas de calidad	Presentados	1886
TELEFÓNICA DEL PERÚ S.A.A.	2016-01-01	PUNO	Telefonía fija	Otros	Solucionados	2001
TELEFÓNICA DEL PERÚ S.A.A.	2016-01-01	CAJAMARCA	Telefonía fija	Otros	Solucionados	2250
TELEFÓNICA DEL PERÚ S.A.A.	2016-01-01	ÁNCASH	Telefonía fija	Servicio no operativo	Presentados	2273
TELEFÓNICA DEL PERÚ S.A.A.	2016-01-01	SAN MARTÍN	Telefonía fija	Otros	Solucionados	2467
TELEFÓNICA DEL PERÚ S.A.A.	2016-01-01	AREQUIPA	Telefonía fija	Problemas de calidad	Presentados	2604
TELEFÓNICA DEL PERÚ S.A.A.	2016-01-01	JUNÍN	Telefonía fija	Servicio no operativo	Presentados	2915
TELEFÓNICA DEL PERÚ S.A.A.	2016-01-01	ICA	Telefonía fija	Servicio no operativo	Presentados	3127
TELEFÓNICA DEL PERÚ S.A.A.	2016-01-01	ÁNCASH	Telefonía fija	Otros	Solucionados	3315
TELEFÓNICA DEL PERÚ S.A.A.	2016-01-01	LAMBAYEQUE	Telefonía fija	Servicio no operativo	Presentados	3806
TELEFÓNICA DEL PERÚ S.A.A.	2016-01-01	CUSCO	Telefonía fija	Servicio no operativo	Presentados	4252
TELEFÓNICA DEL PERÚ S.A.A.	2016-01-01	JUNÍN	Telefonía fija	Otros	Solucionados	4341
TELEFÓNICA DEL PERÚ S.A.A.	2016-01-01	PIURA	Telefonía fija	Servicio no operativo	Presentados	4398
AMÉRICA MÓVIL PERÚ S.A.C.	2016-01-01	LIMA Y CALLAO	Telefonía fija	Otros	Solucionados	4598
TELEFÓNICA DEL PERÚ S.A.A.	2016-01-01	ICA	Telefonía fija	Otros	Solucionados	4620
TELEFÓNICA DEL PERÚ S.A.A.	2016-01-01	LA LIBERTAD	Telefonía fija	Servicio no operativo	Presentados	5475
TELEFÓNICA DEL PERÚ S.A.A.	2016-01-01	CUSCO	Telefonía fija	Otros	Solucionados	5501
TELEFÓNICA DEL PERÚ S.A.A.	2016-01-01	LAMBAYEQUE	Telefonía fija	Otros	Solucionados	5617
TELEFÓNICA DEL PERÚ S.A.A.	2016-01-01	AREQUIPA	Telefonía fija	Servicio no operativo	Presentados	5624
TELEFÓNICA DEL PERÚ S.A.A.	2016-01-01	PIURA	Telefonía fija	Otros	Solucionados	5874
TELEFÓNICA DEL PERÚ S.A.A.	2016-01-01	LA LIBERTAD	Telefonía fija	Otros	Solucionados	7129
TELEFÓNICA DEL PERÚ S.A.A.	2016-01-01	AREQUIPA	Telefonía fija	Otros	Solucionados	8036
AMÉRICA MÓVIL PERÚ S.A.C.	2016-01-01	LIMA Y CALLAO	Telefonía fija	Problemas de calidad	Presentados	11975
TELEFÓNICA DEL PERÚ S.A.A.	2016-01-01	LIMA Y CALLAO	Telefonía fija	Problemas de calidad	Presentados	40686
TELEFÓNICA DEL PERÚ S.A.A.	2016-01-01	LIMA Y CALLAO	Telefonía fija	Servicio no operativo	Presentados	54372
TELEFÓNICA DEL PERÚ S.A.A.	2016-01-01	LIMA Y CALLAO	Telefonía fija	Otros	Solucionados	90316
GILAT TO HOME PERÚ S.A.	2016-01-01	HUANCAVELICA	Telefonía de uso público	Problemas de calidad	Presentados	1
GILAT TO HOME PERÚ S.A.	2016-01-01	ICA	Telefonía de uso público	Problemas de calidad	Presentados	1
GILAT TO HOME PERÚ S.A.	2016-01-01	ÁNCASH	Telefonía de uso público	Servicio no operativo	Presentados	1
GILAT TO HOME PERÚ S.A.	2016-01-01	HUÁNUCO	Telefonía de uso público	Servicio no operativo	Presentados	1
GILAT TO HOME PERÚ S.A.	2016-01-01	JUNÍN	Telefonía de uso público	Servicio no operativo	Presentados	1
GILAT TO HOME PERÚ S.A.	2016-01-01	LIMA Y CALLAO	Telefonía de uso público	Servicio no operativo	Presentados	1
GILAT TO HOME PERÚ S.A.	2016-01-01	PASCO	Telefonía de uso público	Servicio no operativo	Presentados	1
GILAT TO HOME PERÚ S.A.	2016-01-01	PIURA	Telefonía de uso público	Servicio no operativo	Presentados	1
GILAT TO HOME PERÚ S.A.	2016-01-01	ÁNCASH	Telefonía de uso público	Otros	Solucionados	1
GILAT TO HOME PERÚ S.A.	2016-01-01	HUANCAVELICA	Telefonía de uso público	Otros	Solucionados	1
GILAT TO HOME PERÚ S.A.	2016-01-01	ICA	Telefonía de uso público	Otros	Solucionados	1
GILAT TO HOME PERÚ S.A.	2016-01-01	LIMA Y CALLAO	Telefonía de uso público	Otros	Solucionados	1
GILAT TO HOME PERÚ S.A.	2016-01-01	PIURA	Telefonía de uso público	Otros	Solucionados	1
TELEFÓNICA DEL PERÚ S.A.A.	2016-01-01	APURÍMAC	Telefonía de uso público	Otros	Presentados	1
TELEFÓNICA DEL PERÚ S.A.A.	2016-01-01	HUANCAVELICA	Telefonía de uso público	Otros	Presentados	1
TELEFÓNICA DEL PERÚ S.A.A.	2016-01-01	MADRE DE DIOS	Telefonía de uso público	Otros	Presentados	1
TELEFÓNICA DEL PERÚ S.A.A.	2016-01-01	PUNO	Telefonía de uso público	Otros	Presentados	1
GILAT TO HOME PERÚ S.A.	2016-01-01	CAJAMARCA	Telefonía de uso público	Problemas de calidad	Presentados	2
GILAT TO HOME PERÚ S.A.	2016-01-01	HUÁNUCO	Telefonía de uso público	Problemas de calidad	Presentados	2
GILAT TO HOME PERÚ S.A.	2016-01-01	PASCO	Telefonía de uso público	Problemas de calidad	Presentados	2
GILAT TO HOME PERÚ S.A.	2016-01-01	UCAYALI	Telefonía de uso público	Problemas de calidad	Presentados	2
GILAT TO HOME PERÚ S.A.	2016-01-01	AYACUCHO	Telefonía de uso público	Servicio no operativo	Presentados	2
GILAT TO HOME PERÚ S.A.	2016-01-01	PUNO	Telefonía de uso público	Servicio no operativo	Presentados	2
GILAT TO HOME PERÚ S.A.	2016-01-01	CAJAMARCA	Telefonía de uso público	Otros	Solucionados	2
GILAT TO HOME PERÚ S.A.	2016-01-01	PUNO	Telefonía de uso público	Otros	Solucionados	2
TELEFÓNICA DEL PERÚ S.A.A.	2016-01-01	PASCO	Telefonía de uso público	Otros	Presentados	2
WINNER SYSTEMS S.A.C.	2016-01-01	PIURA	Telefonía de uso público	Problemas de calidad	Presentados	2
WINNER SYSTEMS S.A.C.	2016-01-01	PIURA	Telefonía de uso público	Otros	Solucionados	2
GILAT TO HOME PERÚ S.A.	2016-01-01	AYACUCHO	Telefonía de uso público	Problemas de calidad	Presentados	3
GILAT TO HOME PERÚ S.A.	2016-01-01	CUSCO	Telefonía de uso público	Problemas de calidad	Presentados	3
GILAT TO HOME PERÚ S.A.	2016-01-01	JUNÍN	Telefonía de uso público	Problemas de calidad	Presentados	3
GILAT TO HOME PERÚ S.A.	2016-01-01	AMAZONAS	Telefonía de uso público	Servicio no operativo	Presentados	3
GILAT TO HOME PERÚ S.A.	2016-01-01	HUÁNUCO	Telefonía de uso público	Otros	Solucionados	3
GILAT TO HOME PERÚ S.A.	2016-01-01	PASCO	Telefonía de uso público	Otros	Solucionados	3
TELEFÓNICA DEL PERÚ S.A.A.	2016-01-01	AREQUIPA	Telefonía de uso público	Otros	Presentados	3
TELEFÓNICA DEL PERÚ S.A.A.	2016-01-01	MOQUEGUA	Telefonía de uso público	Otros	Presentados	3
TELEFÓNICA DEL PERÚ S.A.A.	2016-01-01	SAN MARTÍN	Telefonía de uso público	Otros	Presentados	3
TELEFÓNICA DEL PERÚ S.A.A.	2016-01-01	TACNA	Telefonía de uso público	Otros	Presentados	3
TELEFÓNICA DEL PERÚ S.A.A.	2016-01-01	TUMBES	Telefonía de uso público	Otros	Presentados	3
GILAT TO HOME PERÚ S.A.	2016-01-01	CUSCO	Telefonía de uso público	Servicio no operativo	Presentados	4
GILAT TO HOME PERÚ S.A.	2016-01-01	UCAYALI	Telefonía de uso público	Servicio no operativo	Presentados	4
GILAT TO HOME PERÚ S.A.	2016-01-01	JUNÍN	Telefonía de uso público	Otros	Solucionados	4
GILAT TO HOME PERÚ S.A.	2016-01-01	AMAZONAS	Telefonía de uso público	Problemas de calidad	Presentados	5
GILAT TO HOME PERÚ S.A.	2016-01-01	AYACUCHO	Telefonía de uso público	Otros	Solucionados	5
TELEFÓNICA DEL PERÚ S.A.A.	2016-01-01	AYACUCHO	Telefonía de uso público	Otros	Presentados	5
TELEFÓNICA DEL PERÚ S.A.A.	2016-01-01	CAJAMARCA	Telefonía de uso público	Otros	Presentados	5
GILAT TO HOME PERÚ S.A.	2016-01-01	SAN MARTÍN	Telefonía de uso público	Problemas de calidad	Presentados	6
GILAT TO HOME PERÚ S.A.	2016-01-01	SAN MARTÍN	Telefonía de uso público	Otros	Solucionados	6
GILAT TO HOME PERÚ S.A.	2016-01-01	UCAYALI	Telefonía de uso público	Otros	Solucionados	6
TELEFÓNICA DEL PERÚ S.A.A.	2016-01-01	CUSCO	Telefonía de uso público	Otros	Presentados	6
GILAT TO HOME PERÚ S.A.	2016-01-01	CUSCO	Telefonía de uso público	Otros	Solucionados	7
GILAT TO HOME PERÚ S.A.	2016-01-01	AMAZONAS	Telefonía de uso público	Otros	Solucionados	8
TELEFÓNICA DEL PERÚ S.A.A.	2016-01-01	HUÁNUCO	Telefonía de uso público	Otros	Presentados	8
TELEFÓNICA DEL PERÚ S.A.A.	2016-01-01	UCAYALI	Telefonía de uso público	Otros	Presentados	15
TELEFÓNICA DEL PERÚ S.A.A.	2016-01-01	LA LIBERTAD	Telefonía de uso público	Otros	Presentados	16
TELEFÓNICA DEL PERÚ S.A.A.	2016-01-01	PASCO	Telefonía de uso público	Problemas de calidad	Presentados	17
TELEFÓNICA DEL PERÚ S.A.A.	2016-01-01	ICA	Telefonía de uso público	Otros	Presentados	19
GILAT TO HOME PERÚ S.A.	2016-01-01	LORETO	Telefonía de uso público	Problemas de calidad	Presentados	21
GILAT TO HOME PERÚ S.A.	2016-01-01	LORETO	Telefonía de uso público	Servicio no operativo	Presentados	21
TELEFÓNICA DEL PERÚ S.A.A.	2016-01-01	AMAZONAS	Telefonía de uso público	Problemas de calidad	Presentados	21
TELEFÓNICA DEL PERÚ S.A.A.	2016-01-01	LORETO	Telefonía de uso público	Otros	Presentados	21
TELEFÓNICA DEL PERÚ S.A.A.	2016-01-01	LAMBAYEQUE	Telefonía de uso público	Otros	Presentados	26
TELEFÓNICA DEL PERÚ S.A.A.	2016-01-01	ÁNCASH	Telefonía de uso público	Otros	Presentados	27
TELEFÓNICA DEL PERÚ S.A.A.	2016-01-01	AMAZONAS	Telefonía de uso público	Servicio no operativo	Presentados	32
TELEFÓNICA DEL PERÚ S.A.A.	2016-01-01	PASCO	Telefonía de uso público	Servicio no operativo	Presentados	35
TELEFÓNICA DEL PERÚ S.A.A.	2016-01-01	JUNÍN	Telefonía de uso público	Otros	Presentados	37
GILAT TO HOME PERÚ S.A.	2016-01-01	LORETO	Telefonía de uso público	Otros	Solucionados	42
TELEFÓNICA DEL PERÚ S.A.A.	2016-01-01	PIURA	Telefonía de uso público	Otros	Presentados	48
TELEFÓNICA DEL PERÚ S.A.A.	2016-01-01	HUANCAVELICA	Telefonía de uso público	Problemas de calidad	Presentados	50
TELEFÓNICA DEL PERÚ S.A.A.	2016-01-01	AMAZONAS	Telefonía de uso público	Otros	Solucionados	53
TELEFÓNICA DEL PERÚ S.A.A.	2016-01-01	PASCO	Telefonía de uso público	Otros	Solucionados	54
TELEFÓNICA DEL PERÚ S.A.A.	2016-01-01	APURÍMAC	Telefonía de uso público	Problemas de calidad	Presentados	56
TELEFÓNICA DEL PERÚ S.A.A.	2016-01-01	PUNO	Telefonía de uso público	Problemas de calidad	Presentados	67
TELEFÓNICA DEL PERÚ S.A.A.	2016-01-01	HUANCAVELICA	Telefonía de uso público	Servicio no operativo	Presentados	68
TELEFÓNICA DEL PERÚ S.A.A.	2016-01-01	MADRE DE DIOS	Telefonía de uso público	Problemas de calidad	Presentados	71
TELEFÓNICA DEL PERÚ S.A.A.	2016-01-01	APURÍMAC	Telefonía de uso público	Servicio no operativo	Presentados	92
TELEFÓNICA DEL PERÚ S.A.A.	2016-01-01	MOQUEGUA	Telefonía de uso público	Problemas de calidad	Presentados	97
TELEFÓNICA DEL PERÚ S.A.A.	2016-01-01	TUMBES	Telefonía de uso público	Problemas de calidad	Presentados	109
TELEFÓNICA DEL PERÚ S.A.A.	2016-01-01	HUANCAVELICA	Telefonía de uso público	Otros	Solucionados	117
TELEFÓNICA DEL PERÚ S.A.A.	2016-01-01	PUNO	Telefonía de uso público	Servicio no operativo	Presentados	118
TELEFÓNICA DEL PERÚ S.A.A.	2016-01-01	AYACUCHO	Telefonía de uso público	Problemas de calidad	Presentados	121
TELEFÓNICA DEL PERÚ S.A.A.	2016-01-01	TACNA	Telefonía de uso público	Problemas de calidad	Presentados	129
TELEFÓNICA DEL PERÚ S.A.A.	2016-01-01	HUÁNUCO	Telefonía de uso público	Problemas de calidad	Presentados	141
TELEFÓNICA DEL PERÚ S.A.A.	2016-01-01	APURÍMAC	Telefonía de uso público	Otros	Solucionados	141
TELEFÓNICA DEL PERÚ S.A.A.	2016-01-01	CAJAMARCA	Telefonía de uso público	Problemas de calidad	Presentados	145
TELEFÓNICA DEL PERÚ S.A.A.	2016-01-01	SAN MARTÍN	Telefonía de uso público	Problemas de calidad	Presentados	173
TELEFÓNICA DEL PERÚ S.A.A.	2016-01-01	HUÁNUCO	Telefonía de uso público	Servicio no operativo	Presentados	177
TELEFÓNICA DEL PERÚ S.A.A.	2016-01-01	PUNO	Telefonía de uso público	Otros	Solucionados	177
TELEFÓNICA DEL PERÚ S.A.A.	2016-01-01	MADRE DE DIOS	Telefonía de uso público	Servicio no operativo	Presentados	210
TELEFÓNICA DEL PERÚ S.A.A.	2016-01-01	UCAYALI	Telefonía de uso público	Problemas de calidad	Presentados	228
TELEFÓNICA DEL PERÚ S.A.A.	2016-01-01	TUMBES	Telefonía de uso público	Servicio no operativo	Presentados	240
TELEFÓNICA DEL PERÚ S.A.A.	2016-01-01	CAJAMARCA	Telefonía de uso público	Servicio no operativo	Presentados	244
TELEFÓNICA DEL PERÚ S.A.A.	2016-01-01	MOQUEGUA	Telefonía de uso público	Servicio no operativo	Presentados	251
TELEFÓNICA DEL PERÚ S.A.A.	2016-01-01	MADRE DE DIOS	Telefonía de uso público	Otros	Solucionados	275
TELEFÓNICA DEL PERÚ S.A.A.	2016-01-01	AYACUCHO	Telefonía de uso público	Servicio no operativo	Presentados	287
TELEFÓNICA DEL PERÚ S.A.A.	2016-01-01	HUÁNUCO	Telefonía de uso público	Otros	Solucionados	324
TELEFÓNICA DEL PERÚ S.A.A.	2016-01-01	CUSCO	Telefonía de uso público	Problemas de calidad	Presentados	343
TELEFÓNICA DEL PERÚ S.A.A.	2016-01-01	MOQUEGUA	Telefonía de uso público	Otros	Solucionados	344
TELEFÓNICA DEL PERÚ S.A.A.	2016-01-01	SAN MARTÍN	Telefonía de uso público	Servicio no operativo	Presentados	346
TELEFÓNICA DEL PERÚ S.A.A.	2016-01-01	TUMBES	Telefonía de uso público	Otros	Solucionados	349
TELEFÓNICA DEL PERÚ S.A.A.	2016-01-01	CAJAMARCA	Telefonía de uso público	Otros	Solucionados	391
TELEFÓNICA DEL PERÚ S.A.A.	2016-01-01	AYACUCHO	Telefonía de uso público	Otros	Solucionados	409
TELEFÓNICA DEL PERÚ S.A.A.	2016-01-01	UCAYALI	Telefonía de uso público	Servicio no operativo	Presentados	415
TELEFÓNICA DEL PERÚ S.A.A.	2016-01-01	TACNA	Telefonía de uso público	Servicio no operativo	Presentados	445
TELEFÓNICA DEL PERÚ S.A.A.	2016-01-01	SAN MARTÍN	Telefonía de uso público	Otros	Solucionados	516
TELEFÓNICA DEL PERÚ S.A.A.	2016-01-01	LORETO	Telefonía de uso público	Problemas de calidad	Presentados	527
TELEFÓNICA DEL PERÚ S.A.A.	2016-01-01	TACNA	Telefonía de uso público	Otros	Solucionados	573
TELEFÓNICA DEL PERÚ S.A.A.	2016-01-01	ICA	Telefonía de uso público	Problemas de calidad	Presentados	579
TELEFÓNICA DEL PERÚ S.A.A.	2016-01-01	LIMA Y CALLAO	Telefonía de uso público	Otros	Presentados	582
TELEFÓNICA DEL PERÚ S.A.A.	2016-01-01	ÁNCASH	Telefonía de uso público	Problemas de calidad	Presentados	596
TELEFÓNICA DEL PERÚ S.A.A.	2016-01-01	UCAYALI	Telefonía de uso público	Otros	Solucionados	652
TELEFÓNICA DEL PERÚ S.A.A.	2016-01-01	CUSCO	Telefonía de uso público	Servicio no operativo	Presentados	671
TELEFÓNICA DEL PERÚ S.A.A.	2016-01-01	AREQUIPA	Telefonía de uso público	Problemas de calidad	Presentados	676
TELEFÓNICA DEL PERÚ S.A.A.	2016-01-01	JUNÍN	Telefonía de uso público	Problemas de calidad	Presentados	805
TELEFÓNICA DEL PERÚ S.A.A.	2016-01-01	LAMBAYEQUE	Telefonía de uso público	Problemas de calidad	Presentados	848
TELEFÓNICA DEL PERÚ S.A.A.	2016-01-01	PIURA	Telefonía de uso público	Problemas de calidad	Presentados	941
TELEFÓNICA DEL PERÚ S.A.A.	2016-01-01	ÁNCASH	Telefonía de uso público	Servicio no operativo	Presentados	943
TELEFÓNICA DEL PERÚ S.A.A.	2016-01-01	ICA	Telefonía de uso público	Servicio no operativo	Presentados	951
TELEFÓNICA DEL PERÚ S.A.A.	2016-01-01	LORETO	Telefonía de uso público	Servicio no operativo	Presentados	958
TELEFÓNICA DEL PERÚ S.A.A.	2016-01-01	LA LIBERTAD	Telefonía de uso público	Problemas de calidad	Presentados	967
TELEFÓNICA DEL PERÚ S.A.A.	2016-01-01	CUSCO	Telefonía de uso público	Otros	Solucionados	987
TELEFÓNICA DEL PERÚ S.A.A.	2016-01-01	AREQUIPA	Telefonía de uso público	Servicio no operativo	Presentados	1133
TELEFÓNICA DEL PERÚ S.A.A.	2016-01-01	JUNÍN	Telefonía de uso público	Servicio no operativo	Presentados	1192
TELEFÓNICA DEL PERÚ S.A.A.	2016-01-01	LORETO	Telefonía de uso público	Otros	Solucionados	1498
TELEFÓNICA DEL PERÚ S.A.A.	2016-01-01	ICA	Telefonía de uso público	Otros	Solucionados	1539
TELEFÓNICA DEL PERÚ S.A.A.	2016-01-01	ÁNCASH	Telefonía de uso público	Otros	Solucionados	1552
TELEFÓNICA DEL PERÚ S.A.A.	2016-01-01	LAMBAYEQUE	Telefonía de uso público	Servicio no operativo	Presentados	1563
TELEFÓNICA DEL PERÚ S.A.A.	2016-01-01	LA LIBERTAD	Telefonía de uso público	Servicio no operativo	Presentados	1699
TELEFÓNICA DEL PERÚ S.A.A.	2016-01-01	PIURA	Telefonía de uso público	Servicio no operativo	Presentados	1786
TELEFÓNICA DEL PERÚ S.A.A.	2016-01-01	AREQUIPA	Telefonía de uso público	Otros	Solucionados	1805
TELEFÓNICA DEL PERÚ S.A.A.	2016-01-01	JUNÍN	Telefonía de uso público	Otros	Solucionados	2018
TELEFÓNICA DEL PERÚ S.A.A.	2016-01-01	LAMBAYEQUE	Telefonía de uso público	Otros	Solucionados	2395
TELEFÓNICA DEL PERÚ S.A.A.	2016-01-01	LA LIBERTAD	Telefonía de uso público	Otros	Solucionados	2622
TELEFÓNICA DEL PERÚ S.A.A.	2016-01-01	PIURA	Telefonía de uso público	Otros	Solucionados	2760
TELEFÓNICA DEL PERÚ S.A.A.	2016-01-01	LIMA Y CALLAO	Telefonía de uso público	Problemas de calidad	Presentados	8239
TELEFÓNICA DEL PERÚ S.A.A.	2016-01-01	LIMA Y CALLAO	Telefonía de uso público	Servicio no operativo	Presentados	17085
TELEFÓNICA DEL PERÚ S.A.A.	2016-01-01	LIMA Y CALLAO	Telefonía de uso público	Otros	Solucionados	25175
CORPORACION T&E S.R.L.	2016-01-01	JUNÍN	Televisión de paga	Otros	Presentados	1
CORPORACION T&E S.R.L.	2016-01-01	JUNÍN	Televisión de paga	Otros	Solucionados	1
DKR VISION S.R.L.	2016-01-01	ÁNCASH	Televisión de paga	Otros	Presentados	1
RED DE COMUNICACIONES DIGITALES S.A.C.	2016-01-01	SAN MARTÍN	Televisión de paga	Servicio no operativo	Presentados	1
SOTELO & MOTALVAN	2016-01-01	PIURA	Televisión de paga	Problemas de calidad	Presentados	1
TELE STAR AMAZONAS S.R.L	2016-01-01	LORETO	Televisión de paga	Problemas de calidad	Presentados	1
TODO TV VILLA RICA S.R.L	2016-01-01	PASCO	Televisión de paga	Problemas de calidad	Presentados	1
TODO TV VILLA RICA S.R.L	2016-01-01	PASCO	Televisión de paga	Servicio no operativo	Presentados	1
TV SAT KABEL S.R.L.	2016-01-01	ICA	Televisión de paga	Otros	Presentados	1
CABLE STAR S.A.C.	2016-01-01	PASCO	Televisión de paga	Servicio no operativo	Presentados	2
CATV SYSTEMS E.I.R.L.	2016-01-01	LAMBAYEQUE	Televisión de paga	Problemas de calidad	Presentados	2
CATV SYSTEMS E.I.R.L.	2016-01-01	ÁNCASH	Televisión de paga	Servicio no operativo	Presentados	2
GERMÁN AIQUE VARGAS	2016-01-01	SAN MARTÍN	Televisión de paga	Problemas de calidad	Presentados	2
GERMÁN AIQUE VARGAS	2016-01-01	SAN MARTÍN	Televisión de paga	Otros	Solucionados	2
TODO TV VILLA RICA S.R.L	2016-01-01	PASCO	Televisión de paga	Otros	Solucionados	2
TV SAT KABEL S.R.L.	2016-01-01	ICA	Televisión de paga	Servicio no operativo	Presentados	2
A & P SERVITEL S.A.C.	2016-01-01	JUNÍN	Televisión de paga	Otros	Presentados	3
AMAZONIA T.V. S.R.LTDA	2016-01-01	SAN MARTÍN	Televisión de paga	Problemas de calidad	Presentados	3
AMÉRICA MÓVIL PERÚ S.A.C.	2016-01-01	PASCO	Televisión de paga	Otros	Solucionados	3
CATV SYSTEMS E.I.R.L.	2016-01-01	LAMBAYEQUE	Televisión de paga	Servicio no operativo	Presentados	3
DEMETRIO RIGOBERTO PICÓN ACOSTA	2016-01-01	LIMA Y CALLAO	Televisión de paga	Otros	Solucionados	3
DKR VISION S.R.L.	2016-01-01	ÁNCASH	Televisión de paga	Problemas de calidad	Presentados	3
P.T.A. TELECOMUNICACIONES S.R.L	2016-01-01	HUÁNUCO	Televisión de paga	Otros	Presentados	3
SOTELO & MOTALVAN	2016-01-01	PIURA	Televisión de paga	Otros	Presentados	3
TELE STAR AMAZONAS S.R.L	2016-01-01	LORETO	Televisión de paga	Otros	Presentados	3
TELEVISION SATELITAL CONCEPCION S.R.L.	2016-01-01	JUNÍN	Televisión de paga	Otros	Presentados	3
TELEVISION SATELITAL CONCEPCION S.R.L.	2016-01-01	JUNÍN	Televisión de paga	Otros	Solucionados	3
TV SAT KABEL S.R.L.	2016-01-01	ICA	Televisión de paga	Otros	Solucionados	3
AMAZONIA T.V. S.R.LTDA	2016-01-01	SAN MARTÍN	Televisión de paga	Otros	Presentados	4
AMÉRICA MÓVIL PERÚ S.A.C.	2016-01-01	HUANCAVELICA	Televisión de paga	Otros	Solucionados	4
CATV SYSTEMS E.I.R.L.	2016-01-01	ÁNCASH	Televisión de paga	Problemas de calidad	Presentados	4
FRANCISCO HUGO MENA TIPTO	2016-01-01	CUSCO	Televisión de paga	Otros	Solucionados	4
SOTELO & MOTALVAN	2016-01-01	PIURA	Televisión de paga	Otros	Solucionados	4
TELE STAR AMAZONAS S.R.L	2016-01-01	LORETO	Televisión de paga	Otros	Solucionados	4
A & P SERVITEL S.A.C.	2016-01-01	JUNÍN	Televisión de paga	Problemas de calidad	Presentados	5
CABLE SISTEMAS S.R.L.	2016-01-01	APURÍMAC	Televisión de paga	Servicio no operativo	Presentados	5
CABLE STAR S.A.C.	2016-01-01	PASCO	Televisión de paga	Problemas de calidad	Presentados	5
CATV SYSTEMS E.I.R.L.	2016-01-01	AYACUCHO	Televisión de paga	Otros	Solucionados	5
CATV SYSTEMS E.I.R.L.	2016-01-01	LAMBAYEQUE	Televisión de paga	Otros	Solucionados	5
JUAN DANIEL CHAVARRIA COTRINA	2016-01-01	LIMA Y CALLAO	Televisión de paga	Problemas de calidad	Presentados	5
OMNISAT CABLE TELEVISION S.R.L.	2016-01-01	PIURA	Televisión de paga	Otros	Presentados	5
RICARDO MARIO QUISPE CHOCCE	2016-01-01	JUNÍN	Televisión de paga	Problemas de calidad	Presentados	5
RICARDO MARIO QUISPE CHOCCE	2016-01-01	JUNÍN	Televisión de paga	Otros	Solucionados	5
CATV SYSTEMS E.I.R.L.	2016-01-01	ÁNCASH	Televisión de paga	Otros	Solucionados	6
DIRECTV PERU S.R.L	2016-01-01	TUMBES	Televisión de paga	Otros	Solucionados	6
FLOR DE MARÍA GUERRA VELA	2016-01-01	SAN MARTÍN	Televisión de paga	Problemas de calidad	Presentados	6
FLOR DE MARÍA GUERRA VELA	2016-01-01	SAN MARTÍN	Televisión de paga	Otros	Solucionados	6
JUAN DANIEL CHAVARRIA COTRINA	2016-01-01	LIMA Y CALLAO	Televisión de paga	Servicio no operativo	Presentados	6
P.T.A. TELECOMUNICACIONES S.R.L	2016-01-01	HUÁNUCO	Televisión de paga	Servicio no operativo	Presentados	6
SISTEMA DE FIBRA OPTICA Y TELECOMUNICACIONES S.A.C.	2016-01-01	ICA	Televisión de paga	Servicio no operativo	Presentados	6
SISTEMA DE FIBRA OPTICA Y TELECOMUNICACIONES S.A.C.	2016-01-01	ICA	Televisión de paga	Otros	Solucionados	6
AMAZONIA T.V. S.R.LTDA	2016-01-01	SAN MARTÍN	Televisión de paga	Otros	Solucionados	7
TV CABLE CATACAOS E.I.R.L.	2016-01-01	PIURA	Televisión de paga	Otros	Presentados	7
TV CABLE CATACAOS E.I.R.L.	2016-01-01	PIURA	Televisión de paga	Otros	Solucionados	7
A & P SERVITEL S.A.C.	2016-01-01	JUNÍN	Televisión de paga	Otros	Solucionados	8
CATV SYSTEMS E.I.R.L.	2016-01-01	LIMA Y CALLAO	Televisión de paga	Servicio no operativo	Presentados	8
DKR VISION S.R.L.	2016-01-01	ÁNCASH	Televisión de paga	Servicio no operativo	Presentados	8
HUASCARAN TELECOM S.A.C.	2016-01-01	ÁNCASH	Televisión de paga	Otros	Presentados	8
TELEFÓNICA DEL PERÚ S.A.A.	2016-01-01	ICA	Televisión de paga	Servicio no operativo	Presentados	8
TELEFÓNICA MULTIMEDIA S.A.C	2016-01-01	ICA	Televisión de paga	Servicio no operativo	Presentados	8
DIRECTV PERU S.R.L	2016-01-01	HUÁNUCO	Televisión de paga	Otros	Solucionados	9
MICROSYSTEM NET COMUNICACIONES E.I.R.L.	2016-01-01	UCAYALI	Televisión de paga	Otros	Presentados	9
OMNISAT CABLE TELEVISION S.R.L.	2016-01-01	PIURA	Televisión de paga	Problemas de calidad	Presentados	9
P.T.A. TELECOMUNICACIONES S.R.L	2016-01-01	HUÁNUCO	Televisión de paga	Otros	Solucionados	9
RED DE COMUNICACIONES DIGITALES S.A.C.	2016-01-01	SAN MARTÍN	Televisión de paga	Problemas de calidad	Presentados	9
ANIBAL ESTRELLA CARTAGENA	2016-01-01	SAN MARTÍN	Televisión de paga	Problemas de calidad	Presentados	10
JUAN DANIEL CHAVARRIA COTRINA	2016-01-01	LIMA Y CALLAO	Televisión de paga	Otros	Presentados	10
RED DE COMUNICACIONES DIGITALES S.A.C.	2016-01-01	SAN MARTÍN	Televisión de paga	Otros	Solucionados	10
RED INTERCABLE PERU S.A.C.	2016-01-01	HUANCAVELICA	Televisión de paga	Problemas de calidad	Presentados	10
RED INTERCABLE PERU S.A.C.	2016-01-01	HUANCAVELICA	Televisión de paga	Otros	Solucionados	10
TELEVISION POR CABLE EL DORADO E.I.R.L	2016-01-01	SAN MARTÍN	Televisión de paga	Problemas de calidad	Presentados	10
TELEVISION POR CABLE EL DORADO E.I.R.L	2016-01-01	SAN MARTÍN	Televisión de paga	Otros	Solucionados	10
CABLE JAÉN S.R.L	2016-01-01	CAJAMARCA	Televisión de paga	Otros	Presentados	11
CABLE ORIENTE S.A	2016-01-01	UCAYALI	Televisión de paga	Otros	Presentados	11
CATV SYSTEMS E.I.R.L.	2016-01-01	LIMA Y CALLAO	Televisión de paga	Problemas de calidad	Presentados	11
DIRECTV PERU S.R.L	2016-01-01	HUANCAVELICA	Televisión de paga	Otros	Solucionados	11
DKR VISION S.R.L.	2016-01-01	ÁNCASH	Televisión de paga	Otros	Solucionados	12
HOMETV S.A.C.	2016-01-01	LAMBAYEQUE	Televisión de paga	Otros	Presentados	12
KTV CABLE S.A.C.	2016-01-01	LIMA Y CALLAO	Televisión de paga	Problemas de calidad	Presentados	12
MICROSYSTEM NET COMUNICACIONES E.I.R.L.	2016-01-01	LAMBAYEQUE	Televisión de paga	Otros	Presentados	12
DIRECTV PERU S.R.L	2016-01-01	APURÍMAC	Televisión de paga	Otros	Solucionados	13
KTV CABLE S.A.C.	2016-01-01	LIMA Y CALLAO	Televisión de paga	Servicio no operativo	Presentados	13
AMÉRICA MÓVIL PERÚ S.A.C.	2016-01-01	HUÁNUCO	Televisión de paga	Otros	Solucionados	14
AMÉRICA MÓVIL PERÚ S.A.C.	2016-01-01	LORETO	Televisión de paga	Otros	Solucionados	14
DIRECTV PERU S.R.L	2016-01-01	TUMBES	Televisión de paga	Problemas de calidad	Presentados	14
COMUNICACIONES PORCÓN S.A.C.	2016-01-01	CAJAMARCA	Televisión de paga	Otros	Presentados	15
HOMETV S.A.C.	2016-01-01	CAJAMARCA	Televisión de paga	Otros	Presentados	15
MICROSYSTEM NET COMUNICACIONES E.I.R.L.	2016-01-01	UCAYALI	Televisión de paga	Problemas de calidad	Presentados	15
DIRECTV PERU S.R.L	2016-01-01	AMAZONAS	Televisión de paga	Otros	Solucionados	16
VIVIANA MARINA RODRÍGUEZ VIENA	2016-01-01	LORETO	Televisión de paga	Problemas de calidad	Presentados	16
VIVIANA MARINA RODRÍGUEZ VIENA	2016-01-01	LORETO	Televisión de paga	Otros	Solucionados	16
AMÉRICA MÓVIL PERÚ S.A.C.	2016-01-01	MOQUEGUA	Televisión de paga	Otros	Solucionados	17
CABLEMAX E.I.R.L	2016-01-01	PIURA	Televisión de paga	Problemas de calidad	Presentados	18
CABLEMAX E.I.R.L	2016-01-01	PIURA	Televisión de paga	Otros	Solucionados	18
RED INTERCABLE PERU S.A.C.	2016-01-01	JUNÍN	Televisión de paga	Problemas de calidad	Presentados	18
RED INTERCABLE PERU S.A.C.	2016-01-01	JUNÍN	Televisión de paga	Otros	Solucionados	18
AMÉRICA MÓVIL PERÚ S.A.C.	2016-01-01	PASCO	Televisión de paga	Problemas de calidad	Presentados	19
AMÉRICA MÓVIL PERÚ S.A.C.	2016-01-01	APURÍMAC	Televisión de paga	Otros	Solucionados	19
AMÉRICA MÓVIL PERÚ S.A.C.	2016-01-01	MADRE DE DIOS	Televisión de paga	Otros	Solucionados	19
AMÉRICA MÓVIL PERÚ S.A.C.	2016-01-01	SAN MARTÍN	Televisión de paga	Otros	Solucionados	19
AMÉRICA MÓVIL PERÚ S.A.C.	2016-01-01	TUMBES	Televisión de paga	Otros	Solucionados	19
CATV SYSTEMS E.I.R.L.	2016-01-01	LIMA Y CALLAO	Televisión de paga	Otros	Solucionados	19
DIRECTV PERU S.R.L	2016-01-01	HUÁNUCO	Televisión de paga	Problemas de calidad	Presentados	19
JHON ANDERSON PEÑALOZA QUINTANILLA	2016-01-01	JUNÍN	Televisión de paga	Otros	Solucionados	19
AMÉRICA MÓVIL PERÚ S.A.C.	2016-01-01	HUANCAVELICA	Televisión de paga	Problemas de calidad	Presentados	20
AMÉRICA MÓVIL PERÚ S.A.C.	2016-01-01	AYACUCHO	Televisión de paga	Otros	Solucionados	20
HOMETV S.A.C.	2016-01-01	LAMBAYEQUE	Televisión de paga	Problemas de calidad	Presentados	20
INVERSIONES Y REPRESENTACIONES DOBLE C E.I.R.L.	2016-01-01	LORETO	Televisión de paga	Problemas de calidad	Presentados	20
INVERSIONES Y REPRESENTACIONES DOBLE C E.I.R.L.	2016-01-01	LORETO	Televisión de paga	Otros	Solucionados	20
JHON ANDERSON PEÑALOZA QUINTANILLA	2016-01-01	JUNÍN	Televisión de paga	Problemas de calidad	Presentados	20
MICROSYSTEM NET COMUNICACIONES E.I.R.L.	2016-01-01	LAMBAYEQUE	Televisión de paga	Problemas de calidad	Presentados	20
TELECOMUNICACIONES MARINO E.I.R.L	2016-01-01	LIMA Y CALLAO	Televisión de paga	Otros	Presentados	20
TELECOMUNICACIONES MARINO E.I.R.L	2016-01-01	LIMA Y CALLAO	Televisión de paga	Otros	Solucionados	20
HOMETV S.A.C.	2016-01-01	CAJAMARCA	Televisión de paga	Problemas de calidad	Presentados	21
JUAN DANIEL CHAVARRIA COTRINA	2016-01-01	LIMA Y CALLAO	Televisión de paga	Otros	Solucionados	21
TELEFÓNICA DEL PERÚ S.A.A.	2016-01-01	HUANCAVELICA	Televisión de paga	Otros	Solucionados	21
TELEFÓNICA MULTIMEDIA S.A.C	2016-01-01	HUANCAVELICA	Televisión de paga	Otros	Solucionados	21
DIRECTV PERU S.R.L	2016-01-01	MOQUEGUA	Televisión de paga	Otros	Solucionados	22
AMÉRICA MÓVIL PERÚ S.A.C.	2016-01-01	TACNA	Televisión de paga	Otros	Solucionados	23
AMÉRICA MÓVIL PERÚ S.A.C.	2016-01-01	UCAYALI	Televisión de paga	Otros	Solucionados	23
TELEFÓNICA DEL PERÚ S.A.A.	2016-01-01	HUANCAVELICA	Televisión de paga	Problemas de calidad	Presentados	23
TELEFÓNICA DEL PERÚ S.A.A.	2016-01-01	PASCO	Televisión de paga	Problemas de calidad	Presentados	23
TELEFÓNICA DEL PERÚ S.A.A.	2016-01-01	AMAZONAS	Televisión de paga	Otros	Solucionados	23
TELEFÓNICA DEL PERÚ S.A.A.	2016-01-01	PASCO	Televisión de paga	Otros	Solucionados	23
TELEFÓNICA MULTIMEDIA S.A.C	2016-01-01	HUANCAVELICA	Televisión de paga	Problemas de calidad	Presentados	23
TELEFÓNICA MULTIMEDIA S.A.C	2016-01-01	PASCO	Televisión de paga	Problemas de calidad	Presentados	23
TELEFÓNICA MULTIMEDIA S.A.C	2016-01-01	AMAZONAS	Televisión de paga	Otros	Solucionados	23
TELEFÓNICA MULTIMEDIA S.A.C	2016-01-01	PASCO	Televisión de paga	Otros	Solucionados	23
MICROSYSTEM NET COMUNICACIONES E.I.R.L.	2016-01-01	UCAYALI	Televisión de paga	Otros	Solucionados	24
MULTISERVICIOS DE TELECOMUNICACIONES SATELITAL E.I.R.L.	2016-01-01	JUNÍN	Televisión de paga	Problemas de calidad	Presentados	24
MULTISERVICIOS DE TELECOMUNICACIONES SATELITAL E.I.R.L.	2016-01-01	JUNÍN	Televisión de paga	Otros	Solucionados	24
KTV CABLE S.A.C.	2016-01-01	LIMA Y CALLAO	Televisión de paga	Otros	Solucionados	25
DIRECTV PERU S.R.L	2016-01-01	PASCO	Televisión de paga	Otros	Solucionados	26
DIRECTV PERU S.R.L	2016-01-01	SAN MARTÍN	Televisión de paga	Otros	Solucionados	26
AMÉRICA MÓVIL PERÚ S.A.C.	2016-01-01	PUNO	Televisión de paga	Otros	Solucionados	27
DIRECTV PERU S.R.L	2016-01-01	HUANCAVELICA	Televisión de paga	Problemas de calidad	Presentados	27
DIRECTV PERU S.R.L	2016-01-01	ÁNCASH	Televisión de paga	Otros	Solucionados	27
CABLE ORIENTE S.A	2016-01-01	UCAYALI	Televisión de paga	Problemas de calidad	Presentados	28
SEÑAL DIGITAL LATINA S.A.C	2016-01-01	LIMA Y CALLAO	Televisión de paga	Servicio no operativo	Presentados	28
AMÉRICA MÓVIL PERÚ S.A.C.	2016-01-01	AMAZONAS	Televisión de paga	Otros	Solucionados	29
DIRECTV PERU S.R.L	2016-01-01	APURÍMAC	Televisión de paga	Problemas de calidad	Presentados	30
DIRECTV PERU S.R.L	2016-01-01	PASCO	Televisión de paga	Problemas de calidad	Presentados	32
DIRECTV PERU S.R.L	2016-01-01	LAMBAYEQUE	Televisión de paga	Otros	Solucionados	32
HOMETV S.A.C.	2016-01-01	LAMBAYEQUE	Televisión de paga	Otros	Solucionados	32
MICROSYSTEM NET COMUNICACIONES E.I.R.L.	2016-01-01	LAMBAYEQUE	Televisión de paga	Otros	Solucionados	32
DIRECTV PERU S.R.L	2016-01-01	MOQUEGUA	Televisión de paga	Problemas de calidad	Presentados	33
DIRECTV PERU S.R.L	2016-01-01	PUNO	Televisión de paga	Otros	Solucionados	33
DIRECTV PERU S.R.L	2016-01-01	UCAYALI	Televisión de paga	Otros	Solucionados	33
TELEFÓNICA DEL PERÚ S.A.A.	2016-01-01	AMAZONAS	Televisión de paga	Problemas de calidad	Presentados	33
TELEFÓNICA MULTIMEDIA S.A.C	2016-01-01	AMAZONAS	Televisión de paga	Problemas de calidad	Presentados	33
DIRECTV PERU S.R.L	2016-01-01	TACNA	Televisión de paga	Otros	Solucionados	35
HOMETV S.A.C.	2016-01-01	CAJAMARCA	Televisión de paga	Otros	Solucionados	36
DIRECTV PERU S.R.L	2016-01-01	AMAZONAS	Televisión de paga	Problemas de calidad	Presentados	37
DIRECTV PERU S.R.L	2016-01-01	AYACUCHO	Televisión de paga	Otros	Solucionados	37
DIRECTV PERU S.R.L	2016-01-01	SAN MARTÍN	Televisión de paga	Problemas de calidad	Presentados	38
DIRECTV PERU S.R.L	2016-01-01	LORETO	Televisión de paga	Otros	Solucionados	38
VIP CHANNEL SAC	2016-01-01	LIMA Y CALLAO	Televisión de paga	Problemas de calidad	Presentados	38
AMÉRICA MÓVIL PERÚ S.A.C.	2016-01-01	CUSCO	Televisión de paga	Otros	Solucionados	41
DIRECTV PERU S.R.L	2016-01-01	LAMBAYEQUE	Televisión de paga	Problemas de calidad	Presentados	41
DIRECTV PERU S.R.L	2016-01-01	CAJAMARCA	Televisión de paga	Otros	Solucionados	41
AMÉRICA MÓVIL PERÚ S.A.C.	2016-01-01	ICA	Televisión de paga	Otros	Solucionados	44
DIRECTV PERU S.R.L	2016-01-01	ÁNCASH	Televisión de paga	Problemas de calidad	Presentados	44
TELECABLE PAITA S.R.L.	2016-01-01	PIURA	Televisión de paga	Problemas de calidad	Presentados	45
TELECABLE PAITA S.R.L.	2016-01-01	PIURA	Televisión de paga	Otros	Solucionados	45
TELECOMUNICACIONES FUTURO GROUP S.R.L	2016-01-01	ÁNCASH	Televisión de paga	Otros	Presentados	45
TELECOMUNICACIONES FUTURO GROUP S.R.L	2016-01-01	ÁNCASH	Televisión de paga	Otros	Solucionados	45
AMÉRICA MÓVIL PERÚ S.A.C.	2016-01-01	LORETO	Televisión de paga	Problemas de calidad	Presentados	48
CABLE ORIENTE S.A	2016-01-01	UCAYALI	Televisión de paga	Servicio no operativo	Presentados	48
CECTEL E.I.R.L.	2016-01-01	SAN MARTÍN	Televisión de paga	Problemas de calidad	Presentados	48
SEÑAL DIGITAL LATINA S.A.C	2016-01-01	LIMA Y CALLAO	Televisión de paga	Problemas de calidad	Presentados	49
DIRECTV PERU S.R.L	2016-01-01	TACNA	Televisión de paga	Problemas de calidad	Presentados	54
AMÉRICA MÓVIL PERÚ S.A.C.	2016-01-01	ÁNCASH	Televisión de paga	Otros	Solucionados	55
AMÉRICA MÓVIL PERÚ S.A.C.	2016-01-01	JUNÍN	Televisión de paga	Otros	Solucionados	55
AMÉRICA MÓVIL PERÚ S.A.C.	2016-01-01	LAMBAYEQUE	Televisión de paga	Otros	Solucionados	58
DIRECTV PERU S.R.L	2016-01-01	LORETO	Televisión de paga	Problemas de calidad	Presentados	58
TELEFÓNICA DEL PERÚ S.A.A.	2016-01-01	APURÍMAC	Televisión de paga	Otros	Solucionados	58
TELEFÓNICA MULTIMEDIA S.A.C	2016-01-01	APURÍMAC	Televisión de paga	Otros	Solucionados	58
AMÉRICA MÓVIL PERÚ S.A.C.	2016-01-01	MADRE DE DIOS	Televisión de paga	Problemas de calidad	Presentados	59
HUASCARAN TELECOM S.A.C.	2016-01-01	ÁNCASH	Televisión de paga	Problemas de calidad	Presentados	59
TELEFÓNICA DEL PERÚ S.A.A.	2016-01-01	APURÍMAC	Televisión de paga	Problemas de calidad	Presentados	61
TELEFÓNICA MULTIMEDIA S.A.C	2016-01-01	APURÍMAC	Televisión de paga	Problemas de calidad	Presentados	61
VIP CHANNEL SAC	2016-01-01	LIMA Y CALLAO	Televisión de paga	Otros	Presentados	61
DIRECTV PERU S.R.L	2016-01-01	UCAYALI	Televisión de paga	Problemas de calidad	Presentados	62
DIRECTV PERU S.R.L	2016-01-01	PIURA	Televisión de paga	Otros	Solucionados	62
DIRECTV PERU S.R.L	2016-01-01	LA LIBERTAD	Televisión de paga	Otros	Solucionados	64
AMÉRICA MÓVIL PERÚ S.A.C.	2016-01-01	CAJAMARCA	Televisión de paga	Otros	Solucionados	65
AMÉRICA MÓVIL PERÚ S.A.C.	2016-01-01	TUMBES	Televisión de paga	Problemas de calidad	Presentados	66
DIRECTV PERU S.R.L	2016-01-01	JUNÍN	Televisión de paga	Otros	Solucionados	67
HUASCARAN TELECOM S.A.C.	2016-01-01	ÁNCASH	Televisión de paga	Otros	Solucionados	67
DIRECTV PERU S.R.L	2016-01-01	AYACUCHO	Televisión de paga	Problemas de calidad	Presentados	68
AMÉRICA MÓVIL PERÚ S.A.C.	2016-01-01	HUÁNUCO	Televisión de paga	Problemas de calidad	Presentados	71
AMÉRICA MÓVIL PERÚ S.A.C.	2016-01-01	MOQUEGUA	Televisión de paga	Problemas de calidad	Presentados	71
AMÉRICA MÓVIL PERÚ S.A.C.	2016-01-01	SAN MARTÍN	Televisión de paga	Problemas de calidad	Presentados	71
DIRECTV PERU S.R.L	2016-01-01	MADRE DE DIOS	Televisión de paga	Otros	Solucionados	71
DIRECTV PERU S.R.L	2016-01-01	CUSCO	Televisión de paga	Otros	Solucionados	72
DIRECTV PERU S.R.L	2016-01-01	CAJAMARCA	Televisión de paga	Problemas de calidad	Presentados	73
AMÉRICA MÓVIL PERÚ S.A.C.	2016-01-01	APURÍMAC	Televisión de paga	Problemas de calidad	Presentados	75
CABLE YURIMAGUAS S.R.LTDA.	2016-01-01	LORETO	Televisión de paga	Problemas de calidad	Presentados	77
CABLE YURIMAGUAS S.R.LTDA.	2016-01-01	LORETO	Televisión de paga	Otros	Solucionados	77
SEÑAL DIGITAL LATINA S.A.C	2016-01-01	LIMA Y CALLAO	Televisión de paga	Otros	Solucionados	77
DIRECTV PERU S.R.L	2016-01-01	PUNO	Televisión de paga	Problemas de calidad	Presentados	81
AMÉRICA MÓVIL PERÚ S.A.C.	2016-01-01	AYACUCHO	Televisión de paga	Problemas de calidad	Presentados	85
AMÉRICA MÓVIL PERÚ S.A.C.	2016-01-01	PUNO	Televisión de paga	Problemas de calidad	Presentados	86
AMÉRICA MÓVIL PERÚ S.A.C.	2016-01-01	UCAYALI	Televisión de paga	Problemas de calidad	Presentados	87
CABLE ORIENTE S.A	2016-01-01	UCAYALI	Televisión de paga	Otros	Solucionados	87
AMÉRICA MÓVIL PERÚ S.A.C.	2016-01-01	AMAZONAS	Televisión de paga	Problemas de calidad	Presentados	89
TELEFÓNICA DEL PERÚ S.A.A.	2016-01-01	MADRE DE DIOS	Televisión de paga	Otros	Solucionados	89
TELEFÓNICA MULTIMEDIA S.A.C	2016-01-01	MADRE DE DIOS	Televisión de paga	Otros	Solucionados	89
DIRECTV PERU S.R.L	2016-01-01	MADRE DE DIOS	Televisión de paga	Problemas de calidad	Presentados	91
DIRECTV PERU S.R.L	2016-01-01	ICA	Televisión de paga	Otros	Solucionados	91
AMÉRICA MÓVIL PERÚ S.A.C.	2016-01-01	AREQUIPA	Televisión de paga	Otros	Solucionados	93
TELEFÓNICA DEL PERÚ S.A.A.	2016-01-01	MADRE DE DIOS	Televisión de paga	Problemas de calidad	Presentados	93
TELEFÓNICA MULTIMEDIA S.A.C	2016-01-01	MADRE DE DIOS	Televisión de paga	Problemas de calidad	Presentados	93
AMÉRICA MÓVIL PERÚ S.A.C.	2016-01-01	LA LIBERTAD	Televisión de paga	Otros	Solucionados	94
STAR GLOBAL COM S.A.C.	2016-01-01	TACNA	Televisión de paga	Problemas de calidad	Presentados	94
TELECABLE SAN HILARION E.I.R.L	2016-01-01	SAN MARTÍN	Televisión de paga	Problemas de calidad	Presentados	94
VIP CHANNEL SAC	2016-01-01	LIMA Y CALLAO	Televisión de paga	Otros	Solucionados	99
DIRECTV PERU S.R.L	2016-01-01	PIURA	Televisión de paga	Problemas de calidad	Presentados	100
SUPERCABLE TELEVISIÓN S.R..L	2016-01-01	CAJAMARCA	Televisión de paga	Otros	Presentados	102
CABLE JAÉN S.R.L	2016-01-01	CAJAMARCA	Televisión de paga	Problemas de calidad	Presentados	106
DIRECTV PERU S.R.L	2016-01-01	JUNÍN	Televisión de paga	Problemas de calidad	Presentados	106
DIRECTV PERU S.R.L	2016-01-01	CUSCO	Televisión de paga	Problemas de calidad	Presentados	108
DIRECTV PERU S.R.L	2016-01-01	AREQUIPA	Televisión de paga	Otros	Solucionados	108
TELEFÓNICA DEL PERÚ S.A.A.	2016-01-01	ÁNCASH	Televisión de paga	Servicio no operativo	Presentados	108
TELEFÓNICA MULTIMEDIA S.A.C	2016-01-01	ÁNCASH	Televisión de paga	Servicio no operativo	Presentados	108
AMÉRICA MÓVIL PERÚ S.A.C.	2016-01-01	TACNA	Televisión de paga	Problemas de calidad	Presentados	109
DIRECTV PERU S.R.L	2016-01-01	ICA	Televisión de paga	Problemas de calidad	Presentados	115
CABLE JAÉN S.R.L	2016-01-01	CAJAMARCA	Televisión de paga	Otros	Solucionados	117
AMÉRICA MÓVIL PERÚ S.A.C.	2016-01-01	PIURA	Televisión de paga	Otros	Solucionados	132
AMÉRICA MÓVIL PERÚ S.A.C.	2016-01-01	ICA	Televisión de paga	Problemas de calidad	Presentados	135
TELEFÓNICA DEL PERÚ S.A.A.	2016-01-01	TUMBES	Televisión de paga	Problemas de calidad	Presentados	145
TELEFÓNICA DEL PERÚ S.A.A.	2016-01-01	TUMBES	Televisión de paga	Otros	Solucionados	145
TELEFÓNICA MULTIMEDIA S.A.C	2016-01-01	TUMBES	Televisión de paga	Problemas de calidad	Presentados	145
TELEFÓNICA MULTIMEDIA S.A.C	2016-01-01	TUMBES	Televisión de paga	Otros	Solucionados	145
DIRECTV PERU S.R.L	2016-01-01	AREQUIPA	Televisión de paga	Problemas de calidad	Presentados	160
AMÉRICA MÓVIL PERÚ S.A.C.	2016-01-01	CUSCO	Televisión de paga	Problemas de calidad	Presentados	164
CABLE SISTEMAS S.R.L.	2016-01-01	APURÍMAC	Televisión de paga	Problemas de calidad	Presentados	167
CABLE SISTEMAS S.R.L.	2016-01-01	APURÍMAC	Televisión de paga	Otros	Solucionados	172
TELEFÓNICA DEL PERÚ S.A.A.	2016-01-01	JUNÍN	Televisión de paga	Servicio no operativo	Presentados	172
TELEFÓNICA MULTIMEDIA S.A.C	2016-01-01	JUNÍN	Televisión de paga	Servicio no operativo	Presentados	172
AMÉRICA MÓVIL PERÚ S.A.C.	2016-01-01	ÁNCASH	Televisión de paga	Problemas de calidad	Presentados	174
AMÉRICA MÓVIL PERÚ S.A.C.	2016-01-01	JUNÍN	Televisión de paga	Problemas de calidad	Presentados	180
DIRECTV PERU S.R.L	2016-01-01	LA LIBERTAD	Televisión de paga	Problemas de calidad	Presentados	180
TELEFÓNICA DEL PERÚ S.A.A.	2016-01-01	AYACUCHO	Televisión de paga	Otros	Solucionados	180
TELEFÓNICA DEL PERÚ S.A.A.	2016-01-01	MOQUEGUA	Televisión de paga	Otros	Solucionados	180
TELEFÓNICA MULTIMEDIA S.A.C	2016-01-01	AYACUCHO	Televisión de paga	Otros	Solucionados	180
TELEFÓNICA MULTIMEDIA S.A.C	2016-01-01	MOQUEGUA	Televisión de paga	Otros	Solucionados	180
TELEFÓNICA DEL PERÚ S.A.A.	2016-01-01	PIURA	Televisión de paga	Servicio no operativo	Presentados	186
TELEFÓNICA MULTIMEDIA S.A.C	2016-01-01	PIURA	Televisión de paga	Servicio no operativo	Presentados	186
TELEFÓNICA DEL PERÚ S.A.A.	2016-01-01	MOQUEGUA	Televisión de paga	Problemas de calidad	Presentados	194
TELEFÓNICA MULTIMEDIA S.A.C	2016-01-01	MOQUEGUA	Televisión de paga	Problemas de calidad	Presentados	194
AMÉRICA MÓVIL PERÚ S.A.C.	2016-01-01	LAMBAYEQUE	Televisión de paga	Problemas de calidad	Presentados	197
TELEFÓNICA DEL PERÚ S.A.A.	2016-01-01	AYACUCHO	Televisión de paga	Problemas de calidad	Presentados	199
TELEFÓNICA MULTIMEDIA S.A.C	2016-01-01	AYACUCHO	Televisión de paga	Problemas de calidad	Presentados	199
TELEFÓNICA DEL PERÚ S.A.A.	2016-01-01	TACNA	Televisión de paga	Otros	Solucionados	202
TELEFÓNICA MULTIMEDIA S.A.C	2016-01-01	TACNA	Televisión de paga	Otros	Solucionados	202
TELEFÓNICA DEL PERÚ S.A.A.	2016-01-01	TACNA	Televisión de paga	Problemas de calidad	Presentados	207
TELEFÓNICA MULTIMEDIA S.A.C	2016-01-01	TACNA	Televisión de paga	Problemas de calidad	Presentados	207
TELEFÓNICA DEL PERÚ S.A.A.	2016-01-01	SAN MARTÍN	Televisión de paga	Otros	Solucionados	209
TELEFÓNICA MULTIMEDIA S.A.C	2016-01-01	SAN MARTÍN	Televisión de paga	Otros	Solucionados	209
TELEFÓNICA DEL PERÚ S.A.A.	2016-01-01	SAN MARTÍN	Televisión de paga	Problemas de calidad	Presentados	217
TELEFÓNICA MULTIMEDIA S.A.C	2016-01-01	SAN MARTÍN	Televisión de paga	Problemas de calidad	Presentados	217
AMÉRICA MÓVIL PERÚ S.A.C.	2016-01-01	CAJAMARCA	Televisión de paga	Problemas de calidad	Presentados	220
TELEFÓNICA DEL PERÚ S.A.A.	2016-01-01	HUÁNUCO	Televisión de paga	Otros	Solucionados	222
TELEFÓNICA MULTIMEDIA S.A.C	2016-01-01	HUÁNUCO	Televisión de paga	Otros	Solucionados	222
TELEFÓNICA DEL PERÚ S.A.A.	2016-01-01	HUÁNUCO	Televisión de paga	Problemas de calidad	Presentados	232
TELEFÓNICA MULTIMEDIA S.A.C	2016-01-01	HUÁNUCO	Televisión de paga	Problemas de calidad	Presentados	232
TELEFÓNICA DEL PERÚ S.A.A.	2016-01-01	CAJAMARCA	Televisión de paga	Otros	Solucionados	247
TELEFÓNICA MULTIMEDIA S.A.C	2016-01-01	CAJAMARCA	Televisión de paga	Otros	Solucionados	247
TELEFÓNICA DEL PERÚ S.A.A.	2016-01-01	CAJAMARCA	Televisión de paga	Problemas de calidad	Presentados	261
TELEFÓNICA MULTIMEDIA S.A.C	2016-01-01	CAJAMARCA	Televisión de paga	Problemas de calidad	Presentados	261
COMUNICACIONES PORCÓN S.A.C.	2016-01-01	CAJAMARCA	Televisión de paga	Problemas de calidad	Presentados	264
COMUNICACIONES PORCÓN S.A.C.	2016-01-01	CAJAMARCA	Televisión de paga	Otros	Solucionados	279
AMÉRICA MÓVIL PERÚ S.A.C.	2016-01-01	AREQUIPA	Televisión de paga	Problemas de calidad	Presentados	287
TELEFÓNICA DEL PERÚ S.A.A.	2016-01-01	PUNO	Televisión de paga	Otros	Solucionados	300
TELEFÓNICA MULTIMEDIA S.A.C	2016-01-01	PUNO	Televisión de paga	Otros	Solucionados	300
TELEFÓNICA DEL PERÚ S.A.A.	2016-01-01	PUNO	Televisión de paga	Problemas de calidad	Presentados	310
TELEFÓNICA MULTIMEDIA S.A.C	2016-01-01	PUNO	Televisión de paga	Problemas de calidad	Presentados	310
TELEFÓNICA DEL PERÚ S.A.A.	2016-01-01	UCAYALI	Televisión de paga	Otros	Solucionados	316
TELEFÓNICA MULTIMEDIA S.A.C	2016-01-01	UCAYALI	Televisión de paga	Otros	Solucionados	316
STAR GLOBAL COM S.A.C.	2016-01-01	AREQUIPA	Televisión de paga	Problemas de calidad	Presentados	317
TELEFÓNICA DEL PERÚ S.A.A.	2016-01-01	UCAYALI	Televisión de paga	Problemas de calidad	Presentados	320
TELEFÓNICA MULTIMEDIA S.A.C	2016-01-01	UCAYALI	Televisión de paga	Problemas de calidad	Presentados	320
TELEFÓNICA DEL PERÚ S.A.A.	2016-01-01	LORETO	Televisión de paga	Otros	Solucionados	337
TELEFÓNICA MULTIMEDIA S.A.C	2016-01-01	LORETO	Televisión de paga	Otros	Solucionados	337
TELEFÓNICA DEL PERÚ S.A.A.	2016-01-01	LORETO	Televisión de paga	Problemas de calidad	Presentados	339
TELEFÓNICA MULTIMEDIA S.A.C	2016-01-01	LORETO	Televisión de paga	Problemas de calidad	Presentados	339
AMÉRICA MÓVIL PERÚ S.A.C.	2016-01-01	LA LIBERTAD	Televisión de paga	Problemas de calidad	Presentados	387
AMÉRICA MÓVIL PERÚ S.A.C.	2016-01-01	PIURA	Televisión de paga	Problemas de calidad	Presentados	394
TELEFÓNICA DEL PERÚ S.A.A.	2016-01-01	CUSCO	Televisión de paga	Servicio no operativo	Presentados	419
TELEFÓNICA MULTIMEDIA S.A.C	2016-01-01	CUSCO	Televisión de paga	Servicio no operativo	Presentados	419
TELEFÓNICA DEL PERÚ S.A.A.	2016-01-01	LAMBAYEQUE	Televisión de paga	Servicio no operativo	Presentados	423
TELEFÓNICA MULTIMEDIA S.A.C	2016-01-01	LAMBAYEQUE	Televisión de paga	Servicio no operativo	Presentados	423
TELEFÓNICA DEL PERÚ S.A.A.	2016-01-01	CUSCO	Televisión de paga	Problemas de calidad	Presentados	533
TELEFÓNICA MULTIMEDIA S.A.C	2016-01-01	CUSCO	Televisión de paga	Problemas de calidad	Presentados	533
TELEFÓNICA DEL PERÚ S.A.A.	2016-01-01	JUNÍN	Televisión de paga	Problemas de calidad	Presentados	574
TELEFÓNICA MULTIMEDIA S.A.C	2016-01-01	JUNÍN	Televisión de paga	Problemas de calidad	Presentados	574
SUPERCABLE TELEVISIÓN S.R..L	2016-01-01	CAJAMARCA	Televisión de paga	Problemas de calidad	Presentados	632
TELEFÓNICA DEL PERÚ S.A.A.	2016-01-01	LA LIBERTAD	Televisión de paga	Servicio no operativo	Presentados	687
TELEFÓNICA MULTIMEDIA S.A.C	2016-01-01	LA LIBERTAD	Televisión de paga	Servicio no operativo	Presentados	687
TELEFÓNICA DEL PERÚ S.A.A.	2016-01-01	JUNÍN	Televisión de paga	Otros	Solucionados	711
TELEFÓNICA MULTIMEDIA S.A.C	2016-01-01	JUNÍN	Televisión de paga	Otros	Solucionados	711
SUPERCABLE TELEVISIÓN S.R..L	2016-01-01	CAJAMARCA	Televisión de paga	Otros	Solucionados	734
TELEFÓNICA DEL PERÚ S.A.A.	2016-01-01	AREQUIPA	Televisión de paga	Servicio no operativo	Presentados	765
TELEFÓNICA MULTIMEDIA S.A.C	2016-01-01	AREQUIPA	Televisión de paga	Servicio no operativo	Presentados	765
TELEFÓNICA DEL PERÚ S.A.A.	2016-01-01	ÁNCASH	Televisión de paga	Problemas de calidad	Presentados	799
TELEFÓNICA MULTIMEDIA S.A.C	2016-01-01	ÁNCASH	Televisión de paga	Problemas de calidad	Presentados	799
DIRECTV PERU S.R.L	2016-01-01	LIMA Y CALLAO	Televisión de paga	Otros	Solucionados	868
TELEFÓNICA DEL PERÚ S.A.A.	2016-01-01	ÁNCASH	Televisión de paga	Otros	Solucionados	884
TELEFÓNICA MULTIMEDIA S.A.C	2016-01-01	ÁNCASH	Televisión de paga	Otros	Solucionados	884
MULTISERVICIOS DE TELECOMUNICACIONES SATELITAL E.I.R.L.	2016-01-01	LIMA Y CALLAO	Televisión de paga	Problemas de calidad	Presentados	893
MULTISERVICIOS DE TELECOMUNICACIONES SATELITAL E.I.R.L.	2016-01-01	LIMA Y CALLAO	Televisión de paga	Otros	Solucionados	893
TELEFÓNICA DEL PERÚ S.A.A.	2016-01-01	CUSCO	Televisión de paga	Otros	Solucionados	919
TELEFÓNICA MULTIMEDIA S.A.C	2016-01-01	CUSCO	Televisión de paga	Otros	Solucionados	919
TELEFÓNICA DEL PERÚ S.A.A.	2016-01-01	ICA	Televisión de paga	Otros	Solucionados	1045
TELEFÓNICA MULTIMEDIA S.A.C	2016-01-01	ICA	Televisión de paga	Otros	Solucionados	1045
TELEFÓNICA DEL PERÚ S.A.A.	2016-01-01	ICA	Televisión de paga	Problemas de calidad	Presentados	1062
TELEFÓNICA MULTIMEDIA S.A.C	2016-01-01	ICA	Televisión de paga	Problemas de calidad	Presentados	1062
TELEFÓNICA DEL PERÚ S.A.A.	2016-01-01	AREQUIPA	Televisión de paga	Problemas de calidad	Presentados	1080
TELEFÓNICA MULTIMEDIA S.A.C	2016-01-01	AREQUIPA	Televisión de paga	Problemas de calidad	Presentados	1080
TELEFÓNICA DEL PERÚ S.A.A.	2016-01-01	PIURA	Televisión de paga	Problemas de calidad	Presentados	1210
TELEFÓNICA MULTIMEDIA S.A.C	2016-01-01	PIURA	Televisión de paga	Problemas de calidad	Presentados	1210
TELEFÓNICA DEL PERÚ S.A.A.	2016-01-01	LAMBAYEQUE	Televisión de paga	Problemas de calidad	Presentados	1233
TELEFÓNICA MULTIMEDIA S.A.C	2016-01-01	LAMBAYEQUE	Televisión de paga	Problemas de calidad	Presentados	1233
AMÉRICA MÓVIL PERÚ S.A.C.	2016-01-01	LIMA Y CALLAO	Televisión de paga	Otros	Solucionados	1314
TELEFÓNICA DEL PERÚ S.A.A.	2016-01-01	PIURA	Televisión de paga	Otros	Solucionados	1339
TELEFÓNICA MULTIMEDIA S.A.C	2016-01-01	PIURA	Televisión de paga	Otros	Solucionados	1339
TELEFÓNICA DEL PERÚ S.A.A.	2016-01-01	LA LIBERTAD	Televisión de paga	Problemas de calidad	Presentados	1480
TELEFÓNICA MULTIMEDIA S.A.C	2016-01-01	LA LIBERTAD	Televisión de paga	Problemas de calidad	Presentados	1480
TELEFÓNICA DEL PERÚ S.A.A.	2016-01-01	LAMBAYEQUE	Televisión de paga	Otros	Solucionados	1587
TELEFÓNICA MULTIMEDIA S.A.C	2016-01-01	LAMBAYEQUE	Televisión de paga	Otros	Solucionados	1587
DIRECTV PERU S.R.L	2016-01-01	LIMA Y CALLAO	Televisión de paga	Problemas de calidad	Presentados	1703
TELEFÓNICA DEL PERÚ S.A.A.	2016-01-01	AREQUIPA	Televisión de paga	Otros	Solucionados	1820
TELEFÓNICA MULTIMEDIA S.A.C	2016-01-01	AREQUIPA	Televisión de paga	Otros	Solucionados	1820
TELEFÓNICA DEL PERÚ S.A.A.	2016-01-01	LA LIBERTAD	Televisión de paga	Otros	Solucionados	2070
TELEFÓNICA MULTIMEDIA S.A.C	2016-01-01	LA LIBERTAD	Televisión de paga	Otros	Solucionados	2070
AMÉRICA MÓVIL PERÚ S.A.C.	2016-01-01	LIMA Y CALLAO	Televisión de paga	Problemas de calidad	Presentados	3611
TELEFÓNICA DEL PERÚ S.A.A.	2016-01-01	LIMA Y CALLAO	Televisión de paga	Servicio no operativo	Presentados	20819
TELEFÓNICA MULTIMEDIA S.A.C	2016-01-01	LIMA Y CALLAO	Televisión de paga	Servicio no operativo	Presentados	20819
TELEFÓNICA DEL PERÚ S.A.A.	2016-01-01	LIMA Y CALLAO	Televisión de paga	Problemas de calidad	Presentados	33689
TELEFÓNICA MULTIMEDIA S.A.C	2016-01-01	LIMA Y CALLAO	Televisión de paga	Problemas de calidad	Presentados	33689
TELEFÓNICA DEL PERÚ S.A.A.	2016-01-01	LIMA Y CALLAO	Televisión de paga	Otros	Solucionados	52777
TELEFÓNICA MULTIMEDIA S.A.C	2016-01-01	LIMA Y CALLAO	Televisión de paga	Otros	Solucionados	52777
AMÉRICA MÓVIL PERÚ S.A.C.	2016-02-01	HUÁNUCO	Arrendamiento de circuitos	Problemas de calidad	Presentados	1
AMÉRICA MÓVIL PERÚ S.A.C.	2016-02-01	ICA	Arrendamiento de circuitos	Problemas de calidad	Presentados	1
AMÉRICA MÓVIL PERÚ S.A.C.	2016-02-01	PIURA	Arrendamiento de circuitos	Problemas de calidad	Presentados	1
AMÉRICA MÓVIL PERÚ S.A.C.	2016-02-01	TACNA	Arrendamiento de circuitos	Problemas de calidad	Presentados	1
AMÉRICA MÓVIL PERÚ S.A.C.	2016-02-01	HUÁNUCO	Arrendamiento de circuitos	Otros	Solucionados	1
AMÉRICA MÓVIL PERÚ S.A.C.	2016-02-01	LA LIBERTAD	Arrendamiento de circuitos	Otros	Solucionados	1
AMÉRICA MÓVIL PERÚ S.A.C.	2016-02-01	PIURA	Arrendamiento de circuitos	Otros	Solucionados	1
AMÉRICA MÓVIL PERÚ S.A.C.	2016-02-01	TACNA	Arrendamiento de circuitos	Otros	Solucionados	1
AMÉRICA MÓVIL PERÚ S.A.C.	2016-02-01	UCAYALI	Arrendamiento de circuitos	Otros	Solucionados	1
AMERICATEL PERÚ S.A.	2016-02-01	APURÍMAC	Arrendamiento de circuitos	Problemas de calidad	Presentados	1
AMERICATEL PERÚ S.A.	2016-02-01	LA LIBERTAD	Arrendamiento de circuitos	Problemas de calidad	Presentados	1
AMERICATEL PERÚ S.A.	2016-02-01	MADRE DE DIOS	Arrendamiento de circuitos	Problemas de calidad	Presentados	1
AMERICATEL PERÚ S.A.	2016-02-01	MOQUEGUA	Arrendamiento de circuitos	Problemas de calidad	Presentados	1
AMERICATEL PERÚ S.A.	2016-02-01	TACNA	Arrendamiento de circuitos	Problemas de calidad	Presentados	1
AMERICATEL PERÚ S.A.	2016-02-01	UCAYALI	Arrendamiento de circuitos	Problemas de calidad	Presentados	1
AMERICATEL PERÚ S.A.	2016-02-01	AREQUIPA	Arrendamiento de circuitos	Servicio no operativo	Presentados	1
AMERICATEL PERÚ S.A.	2016-02-01	AYACUCHO	Arrendamiento de circuitos	Servicio no operativo	Presentados	1
AMERICATEL PERÚ S.A.	2016-02-01	ICA	Arrendamiento de circuitos	Servicio no operativo	Presentados	1
AMERICATEL PERÚ S.A.	2016-02-01	MADRE DE DIOS	Arrendamiento de circuitos	Servicio no operativo	Presentados	1
AMERICATEL PERÚ S.A.	2016-02-01	PUNO	Arrendamiento de circuitos	Servicio no operativo	Presentados	1
AMERICATEL PERÚ S.A.	2016-02-01	AYACUCHO	Arrendamiento de circuitos	Otros	Solucionados	1
AMERICATEL PERÚ S.A.	2016-02-01	JUNÍN	Arrendamiento de circuitos	Otros	Solucionados	1
AMERICATEL PERÚ S.A.	2016-02-01	MADRE DE DIOS	Arrendamiento de circuitos	Otros	Solucionados	1
AMERICATEL PERÚ S.A.	2016-02-01	MOQUEGUA	Arrendamiento de circuitos	Otros	Solucionados	1
GILAT TO HOME PERÚ S.A.	2016-02-01	PUNO	Arrendamiento de circuitos	Servicio no operativo	Presentados	1
GILAT TO HOME PERÚ S.A.	2016-02-01	PUNO	Arrendamiento de circuitos	Otros	Solucionados	1
SENCINET LATAM PERU S.A.C.	2016-02-01	LORETO	Arrendamiento de circuitos	Problemas de calidad	Presentados	1
SENCINET LATAM PERU S.A.C.	2016-02-01	PIURA	Arrendamiento de circuitos	Problemas de calidad	Presentados	1
SENCINET LATAM PERU S.A.C.	2016-02-01	PUNO	Arrendamiento de circuitos	Problemas de calidad	Presentados	1
SENCINET LATAM PERU S.A.C.	2016-02-01	HUÁNUCO	Arrendamiento de circuitos	Servicio no operativo	Presentados	1
SENCINET LATAM PERU S.A.C.	2016-02-01	LAMBAYEQUE	Arrendamiento de circuitos	Servicio no operativo	Presentados	1
SENCINET LATAM PERU S.A.C.	2016-02-01	PIURA	Arrendamiento de circuitos	Servicio no operativo	Presentados	1
SENCINET LATAM PERU S.A.C.	2016-02-01	PUNO	Arrendamiento de circuitos	Servicio no operativo	Presentados	1
AMÉRICA MÓVIL PERÚ S.A.C.	2016-02-01	UCAYALI	Arrendamiento de circuitos	Problemas de calidad	Presentados	2
AMERICATEL PERÚ S.A.	2016-02-01	CUSCO	Arrendamiento de circuitos	Servicio no operativo	Presentados	2
AMERICATEL PERÚ S.A.	2016-02-01	TACNA	Arrendamiento de circuitos	Servicio no operativo	Presentados	2
AMERICATEL PERÚ S.A.	2016-02-01	LAMBAYEQUE	Arrendamiento de circuitos	Otros	Solucionados	2
AMERICATEL PERÚ S.A.	2016-02-01	PUNO	Arrendamiento de circuitos	Otros	Solucionados	2
AMERICATEL PERÚ S.A.	2016-02-01	TACNA	Arrendamiento de circuitos	Otros	Solucionados	2
SENCINET LATAM PERU S.A.C.	2016-02-01	LA LIBERTAD	Arrendamiento de circuitos	Problemas de calidad	Presentados	2
SENCINET LATAM PERU S.A.C.	2016-02-01	ICA	Arrendamiento de circuitos	Servicio no operativo	Presentados	2
AMERICATEL PERÚ S.A.	2016-02-01	LAMBAYEQUE	Arrendamiento de circuitos	Servicio no operativo	Presentados	3
AMERICATEL PERÚ S.A.	2016-02-01	AREQUIPA	Arrendamiento de circuitos	Otros	Solucionados	3
AMERICATEL PERÚ S.A.	2016-02-01	LA LIBERTAD	Arrendamiento de circuitos	Otros	Solucionados	3
SENCINET LATAM PERU S.A.C.	2016-02-01	ICA	Arrendamiento de circuitos	Problemas de calidad	Presentados	3
AMÉRICA MÓVIL PERÚ S.A.C.	2016-02-01	LA LIBERTAD	Arrendamiento de circuitos	Problemas de calidad	Presentados	4
AMERICATEL PERÚ S.A.	2016-02-01	AREQUIPA	Arrendamiento de circuitos	Problemas de calidad	Presentados	5
AMERICATEL PERÚ S.A.	2016-02-01	LA LIBERTAD	Arrendamiento de circuitos	Servicio no operativo	Presentados	7
AMÉRICA MÓVIL PERÚ S.A.C.	2016-02-01	LIMA Y CALLAO	Arrendamiento de circuitos	Otros	Solucionados	8
SENCINET LATAM PERU S.A.C.	2016-02-01	LIMA Y CALLAO	Arrendamiento de circuitos	Problemas de calidad	Presentados	8
SENCINET LATAM PERU S.A.C.	2016-02-01	LIMA Y CALLAO	Arrendamiento de circuitos	Servicio no operativo	Presentados	11
AMERICATEL PERÚ S.A.	2016-02-01	LIMA Y CALLAO	Arrendamiento de circuitos	Problemas de calidad	Presentados	17
AMÉRICA MÓVIL PERÚ S.A.C.	2016-02-01	LIMA Y CALLAO	Arrendamiento de circuitos	Problemas de calidad	Presentados	31
AMERICATEL PERÚ S.A.	2016-02-01	LIMA Y CALLAO	Arrendamiento de circuitos	Otros	Solucionados	44
AMERICATEL PERÚ S.A.	2016-02-01	LIMA Y CALLAO	Arrendamiento de circuitos	Servicio no operativo	Presentados	55
AMÉRICA MÓVIL PERÚ S.A.C.	2016-02-01	AYACUCHO	Internet fijo	Problemas de calidad	Presentados	1
AMÉRICA MÓVIL PERÚ S.A.C.	2016-02-01	AYACUCHO	Internet fijo	Otros	Solucionados	1
AMÉRICA MÓVIL PERÚ S.A.C.	2016-02-01	PASCO	Internet fijo	Otros	Solucionados	1
AMERICATEL PERÚ S.A.	2016-02-01	AREQUIPA	Internet fijo	Problemas de calidad	Presentados	1
AMERICATEL PERÚ S.A.	2016-02-01	ICA	Internet fijo	Problemas de calidad	Presentados	1
AMERICATEL PERÚ S.A.	2016-02-01	JUNÍN	Internet fijo	Problemas de calidad	Presentados	1
AMERICATEL PERÚ S.A.	2016-02-01	LA LIBERTAD	Internet fijo	Servicio no operativo	Presentados	1
AMERICATEL PERÚ S.A.	2016-02-01	ÁNCASH	Internet fijo	Otros	Solucionados	1
AMERICATEL PERÚ S.A.	2016-02-01	APURÍMAC	Internet fijo	Otros	Solucionados	1
AMERICATEL PERÚ S.A.	2016-02-01	ICA	Internet fijo	Otros	Solucionados	1
AMERICATEL PERÚ S.A.	2016-02-01	JUNÍN	Internet fijo	Otros	Solucionados	1
AMERICATEL PERÚ S.A.	2016-02-01	LAMBAYEQUE	Internet fijo	Otros	Solucionados	1
CABLEVISION S.A.C.	2016-02-01	LIMA Y CALLAO	Internet fijo	Problemas de calidad	Presentados	1
CABLEVISION S.A.C.	2016-02-01	LIMA Y CALLAO	Internet fijo	Otros	Presentados	1
COMPAÑÍA DE COMERCIO GLOBAL S.A.C.	2016-02-01	CAJAMARCA	Internet fijo	Problemas de calidad	Presentados	1
COMPAÑÍA DE COMERCIO GLOBAL S.A.C.	2016-02-01	CAJAMARCA	Internet fijo	Otros	Solucionados	1
GILAT TO HOME PERÚ S.A.	2016-02-01	AYACUCHO	Internet fijo	Problemas de calidad	Presentados	1
GILAT TO HOME PERÚ S.A.	2016-02-01	LORETO	Internet fijo	Problemas de calidad	Presentados	1
GILAT TO HOME PERÚ S.A.	2016-02-01	JUNÍN	Internet fijo	Servicio no operativo	Presentados	1
GILAT TO HOME PERÚ S.A.	2016-02-01	LA LIBERTAD	Internet fijo	Servicio no operativo	Presentados	1
GILAT TO HOME PERÚ S.A.	2016-02-01	AYACUCHO	Internet fijo	Otros	Solucionados	1
GILAT TO HOME PERÚ S.A.	2016-02-01	JUNÍN	Internet fijo	Otros	Solucionados	1
GILAT TO HOME PERÚ S.A.	2016-02-01	LA LIBERTAD	Internet fijo	Otros	Solucionados	1
OLO DEL PERÚ S.A.C.	2016-02-01	AREQUIPA	Internet fijo	Otros	Presentados	1
OLO DEL PERÚ S.A.C.	2016-02-01	AREQUIPA	Internet fijo	Otros	Solucionados	1
SENCINET LATAM PERU S.A.C.	2016-02-01	LORETO	Internet fijo	Problemas de calidad	Presentados	1
WINNER SYSTEMS S.A.C.	2016-02-01	PIURA	Internet fijo	Servicio no operativo	Presentados	1
AMERICATEL PERÚ S.A.	2016-02-01	LA LIBERTAD	Internet fijo	Problemas de calidad	Presentados	2
AMERICATEL PERÚ S.A.	2016-02-01	PIURA	Internet fijo	Problemas de calidad	Presentados	2
AMERICATEL PERÚ S.A.	2016-02-01	PUNO	Internet fijo	Problemas de calidad	Presentados	2
AMERICATEL PERÚ S.A.	2016-02-01	ÁNCASH	Internet fijo	Servicio no operativo	Presentados	2
AMERICATEL PERÚ S.A.	2016-02-01	CUSCO	Internet fijo	Servicio no operativo	Presentados	2
AMERICATEL PERÚ S.A.	2016-02-01	ICA	Internet fijo	Servicio no operativo	Presentados	2
AMERICATEL PERÚ S.A.	2016-02-01	PUNO	Internet fijo	Servicio no operativo	Presentados	2
AMERICATEL PERÚ S.A.	2016-02-01	CUSCO	Internet fijo	Otros	Solucionados	2
AMERICATEL PERÚ S.A.	2016-02-01	LA LIBERTAD	Internet fijo	Otros	Solucionados	2
AMERICATEL PERÚ S.A.	2016-02-01	TACNA	Internet fijo	Otros	Solucionados	2
CABLEVISION S.A.C.	2016-02-01	LIMA Y CALLAO	Internet fijo	Otros	Solucionados	2
OLO DEL PERÚ S.A.C.	2016-02-01	ÁNCASH	Internet fijo	Problemas de calidad	Presentados	2
OLO DEL PERÚ S.A.C.	2016-02-01	ÁNCASH	Internet fijo	Otros	Solucionados	2
SENCINET LATAM PERU S.A.C.	2016-02-01	LIMA Y CALLAO	Internet fijo	Problemas de calidad	Presentados	2
WI-NET PERU S.A.C.	2016-02-01	LIMA Y CALLAO	Internet fijo	Servicio no operativo	Presentados	2
AMÉRICA MÓVIL PERÚ S.A.C.	2016-02-01	PASCO	Internet fijo	Problemas de calidad	Presentados	3
AMERICATEL PERÚ S.A.	2016-02-01	AREQUIPA	Internet fijo	Servicio no operativo	Presentados	3
AMERICATEL PERÚ S.A.	2016-02-01	LAMBAYEQUE	Internet fijo	Servicio no operativo	Presentados	3
AMERICATEL PERÚ S.A.	2016-02-01	TACNA	Internet fijo	Servicio no operativo	Presentados	3
AMERICATEL PERÚ S.A.	2016-02-01	AREQUIPA	Internet fijo	Otros	Solucionados	3
AMERICATEL PERÚ S.A.	2016-02-01	PUNO	Internet fijo	Otros	Solucionados	3
AMERICATEL PERÚ S.A.	2016-02-01	PIURA	Internet fijo	Servicio no operativo	Presentados	4
OLO DEL PERÚ S.A.C.	2016-02-01	ICA	Internet fijo	Problemas de calidad	Presentados	4
OLO DEL PERÚ S.A.C.	2016-02-01	ICA	Internet fijo	Otros	Solucionados	4
AMÉRICA MÓVIL PERÚ S.A.C.	2016-02-01	LORETO	Internet fijo	Otros	Solucionados	5
AMÉRICA MÓVIL PERÚ S.A.C.	2016-02-01	LORETO	Internet fijo	Problemas de calidad	Presentados	6
AMERICATEL PERÚ S.A.	2016-02-01	PIURA	Internet fijo	Otros	Solucionados	6
OLO DEL PERÚ S.A.C.	2016-02-01	LA LIBERTAD	Internet fijo	Problemas de calidad	Presentados	6
OLO DEL PERÚ S.A.C.	2016-02-01	LAMBAYEQUE	Internet fijo	Problemas de calidad	Presentados	6
OLO DEL PERÚ S.A.C.	2016-02-01	LA LIBERTAD	Internet fijo	Otros	Solucionados	6
OLO DEL PERÚ S.A.C.	2016-02-01	LAMBAYEQUE	Internet fijo	Otros	Solucionados	6
TELEFÓNICA DEL PERÚ S.A.A.	2016-02-01	AMAZONAS	Internet fijo	Problemas de calidad	Presentados	7
TVS WIRELESS S.A.C.	2016-02-01	LIMA Y CALLAO	Internet fijo	Problemas de calidad	Presentados	7
TVS WIRELESS S.A.C.	2016-02-01	LIMA Y CALLAO	Internet fijo	Otros	Presentados	7
TVS WIRELESS S.A.C.	2016-02-01	LIMA Y CALLAO	Internet fijo	Otros	Solucionados	7
AGUSTINA SERVICIOS GENERALES S.A.C.	2016-02-01	LA LIBERTAD	Internet fijo	Servicio no operativo	Presentados	8
GILAT TO HOME PERÚ S.A.	2016-02-01	LORETO	Internet fijo	Servicio no operativo	Presentados	8
MOCHE INVERSIONES S.A.	2016-02-01	LIMA Y CALLAO	Internet fijo	Problemas de calidad	Presentados	8
GILAT TO HOME PERÚ S.A.	2016-02-01	LORETO	Internet fijo	Otros	Solucionados	9
MOCHE INVERSIONES S.A.	2016-02-01	LIMA Y CALLAO	Internet fijo	Otros	Presentados	9
AGUSTINA SERVICIOS GENERALES S.A.C.	2016-02-01	LA LIBERTAD	Internet fijo	Problemas de calidad	Presentados	10
AMÉRICA MÓVIL PERÚ S.A.C.	2016-02-01	SAN MARTÍN	Internet fijo	Otros	Solucionados	11
AMÉRICA MÓVIL PERÚ S.A.C.	2016-02-01	SAN MARTÍN	Internet fijo	Problemas de calidad	Presentados	14
AMÉRICA MÓVIL PERÚ S.A.C.	2016-02-01	MOQUEGUA	Internet fijo	Otros	Solucionados	14
RED INTERCABLE PERU S.A.C.	2016-02-01	JUNÍN	Internet fijo	Problemas de calidad	Presentados	14
RED INTERCABLE PERU S.A.C.	2016-02-01	JUNÍN	Internet fijo	Otros	Solucionados	14
TELEFÓNICA DEL PERÚ S.A.A.	2016-02-01	AMAZONAS	Internet fijo	Otros	Presentados	14
AMÉRICA MÓVIL PERÚ S.A.C.	2016-02-01	MOQUEGUA	Internet fijo	Problemas de calidad	Presentados	18
AMÉRICA MÓVIL PERÚ S.A.C.	2016-02-01	TUMBES	Internet fijo	Otros	Solucionados	20
AMÉRICA MÓVIL PERÚ S.A.C.	2016-02-01	CUSCO	Internet fijo	Otros	Solucionados	21
MOCHE INVERSIONES S.A.	2016-02-01	LIMA Y CALLAO	Internet fijo	Servicio no operativo	Presentados	21
WINNER SYSTEMS S.A.C.	2016-02-01	PIURA	Internet fijo	Problemas de calidad	Presentados	26
WINNER SYSTEMS S.A.C.	2016-02-01	PIURA	Internet fijo	Otros	Solucionados	27
AMÉRICA MÓVIL PERÚ S.A.C.	2016-02-01	PUNO	Internet fijo	Otros	Solucionados	28
AMÉRICA MÓVIL PERÚ S.A.C.	2016-02-01	JUNÍN	Internet fijo	Otros	Solucionados	31
AMÉRICA MÓVIL PERÚ S.A.C.	2016-02-01	UCAYALI	Internet fijo	Otros	Solucionados	31
TELEFÓNICA DEL PERÚ S.A.A.	2016-02-01	HUANCAVELICA	Internet fijo	Otros	Presentados	31
CONVERGIA PERÚ S.A.	2016-02-01	LIMA Y CALLAO	Internet fijo	Problemas de calidad	Presentados	32
TELEFÓNICA DEL PERÚ S.A.A.	2016-02-01	PASCO	Internet fijo	Otros	Presentados	33
AMÉRICA MÓVIL PERÚ S.A.C.	2016-02-01	MADRE DE DIOS	Internet fijo	Otros	Solucionados	36
TELEFÓNICA DEL PERÚ S.A.A.	2016-02-01	HUANCAVELICA	Internet fijo	Problemas de calidad	Presentados	36
AMÉRICA MÓVIL PERÚ S.A.C.	2016-02-01	HUÁNUCO	Internet fijo	Otros	Solucionados	37
MOCHE INVERSIONES S.A.	2016-02-01	LIMA Y CALLAO	Internet fijo	Otros	Solucionados	38
TELEFÓNICA DEL PERÚ S.A.A.	2016-02-01	MADRE DE DIOS	Internet fijo	Problemas de calidad	Presentados	38
TELEFÓNICA DEL PERÚ S.A.A.	2016-02-01	AMAZONAS	Internet fijo	Servicio no operativo	Presentados	38
AMÉRICA MÓVIL PERÚ S.A.C.	2016-02-01	ÁNCASH	Internet fijo	Otros	Solucionados	39
AMÉRICA MÓVIL PERÚ S.A.C.	2016-02-01	TUMBES	Internet fijo	Problemas de calidad	Presentados	41
AMÉRICA MÓVIL PERÚ S.A.C.	2016-02-01	CUSCO	Internet fijo	Problemas de calidad	Presentados	43
OLO DEL PERÚ S.A.C.	2016-02-01	LIMA Y CALLAO	Internet fijo	Servicio no operativo	Presentados	46
STAR GLOBAL COM S.A.C.	2016-02-01	TACNA	Internet fijo	Problemas de calidad	Presentados	46
AMÉRICA MÓVIL PERÚ S.A.C.	2016-02-01	MADRE DE DIOS	Internet fijo	Problemas de calidad	Presentados	47
AMÉRICA MÓVIL PERÚ S.A.C.	2016-02-01	UCAYALI	Internet fijo	Problemas de calidad	Presentados	48
AMÉRICA MÓVIL PERÚ S.A.C.	2016-02-01	CAJAMARCA	Internet fijo	Otros	Solucionados	49
TELEFÓNICA DEL PERÚ S.A.A.	2016-02-01	MADRE DE DIOS	Internet fijo	Otros	Presentados	49
AMÉRICA MÓVIL PERÚ S.A.C.	2016-02-01	PUNO	Internet fijo	Problemas de calidad	Presentados	50
TELEFÓNICA DEL PERÚ S.A.A.	2016-02-01	PASCO	Internet fijo	Problemas de calidad	Presentados	53
TELEFÓNICA DEL PERÚ S.A.A.	2016-02-01	APURÍMAC	Internet fijo	Otros	Presentados	53
TELEFÓNICA DEL PERÚ S.A.A.	2016-02-01	AMAZONAS	Internet fijo	Otros	Solucionados	57
AMÉRICA MÓVIL PERÚ S.A.C.	2016-02-01	ICA	Internet fijo	Otros	Solucionados	58
AMÉRICA MÓVIL PERÚ S.A.C.	2016-02-01	ÁNCASH	Internet fijo	Problemas de calidad	Presentados	65
AMÉRICA MÓVIL PERÚ S.A.C.	2016-02-01	JUNÍN	Internet fijo	Problemas de calidad	Presentados	66
AMÉRICA MÓVIL PERÚ S.A.C.	2016-02-01	TACNA	Internet fijo	Otros	Solucionados	70
TELEFÓNICA DEL PERÚ S.A.A.	2016-02-01	APURÍMAC	Internet fijo	Problemas de calidad	Presentados	70
OLO DEL PERÚ S.A.C.	2016-02-01	LIMA Y CALLAO	Internet fijo	Otros	Presentados	75
AMÉRICA MÓVIL PERÚ S.A.C.	2016-02-01	CAJAMARCA	Internet fijo	Problemas de calidad	Presentados	84
TELEFÓNICA DEL PERÚ S.A.A.	2016-02-01	MOQUEGUA	Internet fijo	Otros	Presentados	85
AMÉRICA MÓVIL PERÚ S.A.C.	2016-02-01	HUÁNUCO	Internet fijo	Problemas de calidad	Presentados	90
TELEFÓNICA DEL PERÚ S.A.A.	2016-02-01	AYACUCHO	Internet fijo	Otros	Presentados	98
TELEFÓNICA DEL PERÚ S.A.A.	2016-02-01	HUÁNUCO	Internet fijo	Otros	Presentados	99
TELEFÓNICA DEL PERÚ S.A.A.	2016-02-01	TUMBES	Internet fijo	Problemas de calidad	Presentados	100
TELEFÓNICA DEL PERÚ S.A.A.	2016-02-01	TUMBES	Internet fijo	Otros	Presentados	102
TELEFÓNICA DEL PERÚ S.A.A.	2016-02-01	CAJAMARCA	Internet fijo	Otros	Presentados	108
TELEFÓNICA DEL PERÚ S.A.A.	2016-02-01	LORETO	Internet fijo	Problemas de calidad	Presentados	110
AMÉRICA MÓVIL PERÚ S.A.C.	2016-02-01	ICA	Internet fijo	Problemas de calidad	Presentados	112
TELEFÓNICA DEL PERÚ S.A.A.	2016-02-01	TACNA	Internet fijo	Problemas de calidad	Presentados	123
TELEFÓNICA DEL PERÚ S.A.A.	2016-02-01	HUÁNUCO	Internet fijo	Problemas de calidad	Presentados	124
AMÉRICA MÓVIL PERÚ S.A.C.	2016-02-01	PIURA	Internet fijo	Otros	Solucionados	128
TELEFÓNICA DEL PERÚ S.A.A.	2016-02-01	CAJAMARCA	Internet fijo	Problemas de calidad	Presentados	129
AMÉRICA MÓVIL PERÚ S.A.C.	2016-02-01	LAMBAYEQUE	Internet fijo	Otros	Solucionados	145
TELEFÓNICA DEL PERÚ S.A.A.	2016-02-01	TACNA	Internet fijo	Otros	Presentados	145
AMÉRICA MÓVIL PERÚ S.A.C.	2016-02-01	TACNA	Internet fijo	Problemas de calidad	Presentados	162
TELEFÓNICA DEL PERÚ S.A.A.	2016-02-01	MOQUEGUA	Internet fijo	Problemas de calidad	Presentados	166
AMÉRICA MÓVIL PERÚ S.A.C.	2016-02-01	AREQUIPA	Internet fijo	Otros	Solucionados	168
TELEFÓNICA DEL PERÚ S.A.A.	2016-02-01	PUNO	Internet fijo	Otros	Presentados	175
AMÉRICA MÓVIL PERÚ S.A.C.	2016-02-01	LA LIBERTAD	Internet fijo	Otros	Solucionados	184
AMÉRICA MÓVIL PERÚ S.A.C.	2016-02-01	PIURA	Internet fijo	Problemas de calidad	Presentados	200
TELEFÓNICA DEL PERÚ S.A.A.	2016-02-01	UCAYALI	Internet fijo	Problemas de calidad	Presentados	203
TELEFÓNICA DEL PERÚ S.A.A.	2016-02-01	AYACUCHO	Internet fijo	Problemas de calidad	Presentados	210
TELEFÓNICA DEL PERÚ S.A.A.	2016-02-01	UCAYALI	Internet fijo	Otros	Presentados	212
TELEFÓNICA DEL PERÚ S.A.A.	2016-02-01	SAN MARTÍN	Internet fijo	Otros	Presentados	220
TELEFÓNICA DEL PERÚ S.A.A.	2016-02-01	SAN MARTÍN	Internet fijo	Problemas de calidad	Presentados	237
STAR GLOBAL COM S.A.C.	2016-02-01	AREQUIPA	Internet fijo	Problemas de calidad	Presentados	249
TELEFÓNICA DEL PERÚ S.A.A.	2016-02-01	LORETO	Internet fijo	Otros	Presentados	281
AMERICATEL PERÚ S.A.	2016-02-01	LIMA Y CALLAO	Internet fijo	Problemas de calidad	Presentados	307
TELEFÓNICA DEL PERÚ S.A.A.	2016-02-01	PUNO	Internet fijo	Problemas de calidad	Presentados	309
AMÉRICA MÓVIL PERÚ S.A.C.	2016-02-01	AREQUIPA	Internet fijo	Problemas de calidad	Presentados	344
TELEFÓNICA DEL PERÚ S.A.A.	2016-02-01	MADRE DE DIOS	Internet fijo	Servicio no operativo	Presentados	347
TELEFÓNICA DEL PERÚ S.A.A.	2016-02-01	JUNÍN	Internet fijo	Otros	Presentados	367
TELEFÓNICA DEL PERÚ S.A.A.	2016-02-01	PASCO	Internet fijo	Servicio no operativo	Presentados	375
TELEFÓNICA DEL PERÚ S.A.A.	2016-02-01	ÁNCASH	Internet fijo	Problemas de calidad	Presentados	377
AMÉRICA MÓVIL PERÚ S.A.C.	2016-02-01	LAMBAYEQUE	Internet fijo	Problemas de calidad	Presentados	393
AMERICATEL PERÚ S.A.	2016-02-01	LIMA Y CALLAO	Internet fijo	Otros	Solucionados	394
TELEFÓNICA DEL PERÚ S.A.A.	2016-02-01	MADRE DE DIOS	Internet fijo	Otros	Solucionados	418
TELEFÓNICA DEL PERÚ S.A.A.	2016-02-01	PASCO	Internet fijo	Otros	Solucionados	422
TELEFÓNICA DEL PERÚ S.A.A.	2016-02-01	ICA	Internet fijo	Problemas de calidad	Presentados	429
TELEFÓNICA DEL PERÚ S.A.A.	2016-02-01	CUSCO	Internet fijo	Otros	Presentados	432
TELEFÓNICA DEL PERÚ S.A.A.	2016-02-01	ICA	Internet fijo	Otros	Presentados	438
TELEFÓNICA DEL PERÚ S.A.A.	2016-02-01	HUANCAVELICA	Internet fijo	Servicio no operativo	Presentados	451
TELEFÓNICA DEL PERÚ S.A.A.	2016-02-01	JUNÍN	Internet fijo	Problemas de calidad	Presentados	457
TELEFÓNICA DEL PERÚ S.A.A.	2016-02-01	HUANCAVELICA	Internet fijo	Otros	Solucionados	458
AMERICATEL PERÚ S.A.	2016-02-01	LIMA Y CALLAO	Internet fijo	Servicio no operativo	Presentados	497
TELEFÓNICA DEL PERÚ S.A.A.	2016-02-01	ÁNCASH	Internet fijo	Otros	Presentados	514
AMÉRICA MÓVIL PERÚ S.A.C.	2016-02-01	LA LIBERTAD	Internet fijo	Problemas de calidad	Presentados	538
TELEFÓNICA DEL PERÚ S.A.A.	2016-02-01	CUSCO	Internet fijo	Problemas de calidad	Presentados	567
TELEFÓNICA DEL PERÚ S.A.A.	2016-02-01	LAMBAYEQUE	Internet fijo	Problemas de calidad	Presentados	600
TELEFÓNICA DEL PERÚ S.A.A.	2016-02-01	LA LIBERTAD	Internet fijo	Problemas de calidad	Presentados	648
TELEFÓNICA DEL PERÚ S.A.A.	2016-02-01	PIURA	Internet fijo	Problemas de calidad	Presentados	651
TELEFÓNICA DEL PERÚ S.A.A.	2016-02-01	APURÍMAC	Internet fijo	Servicio no operativo	Presentados	733
TELEFÓNICA DEL PERÚ S.A.A.	2016-02-01	AREQUIPA	Internet fijo	Otros	Presentados	772
TELEFÓNICA DEL PERÚ S.A.A.	2016-02-01	LAMBAYEQUE	Internet fijo	Otros	Presentados	814
TELEFÓNICA DEL PERÚ S.A.A.	2016-02-01	MOQUEGUA	Internet fijo	Servicio no operativo	Presentados	822
TELEFÓNICA DEL PERÚ S.A.A.	2016-02-01	APURÍMAC	Internet fijo	Otros	Solucionados	825
TELEFÓNICA DEL PERÚ S.A.A.	2016-02-01	AREQUIPA	Internet fijo	Problemas de calidad	Presentados	850
TELEFÓNICA DEL PERÚ S.A.A.	2016-02-01	PIURA	Internet fijo	Otros	Presentados	914
TELEFÓNICA DEL PERÚ S.A.A.	2016-02-01	TACNA	Internet fijo	Servicio no operativo	Presentados	917
TELEFÓNICA DEL PERÚ S.A.A.	2016-02-01	TUMBES	Internet fijo	Servicio no operativo	Presentados	946
TELEFÓNICA DEL PERÚ S.A.A.	2016-02-01	CAJAMARCA	Internet fijo	Servicio no operativo	Presentados	1015
TELEFÓNICA DEL PERÚ S.A.A.	2016-02-01	HUÁNUCO	Internet fijo	Servicio no operativo	Presentados	1016
TELEFÓNICA DEL PERÚ S.A.A.	2016-02-01	MOQUEGUA	Internet fijo	Otros	Solucionados	1057
TELEFÓNICA DEL PERÚ S.A.A.	2016-02-01	TUMBES	Internet fijo	Otros	Solucionados	1104
TELEFÓNICA DEL PERÚ S.A.A.	2016-02-01	HUÁNUCO	Internet fijo	Otros	Solucionados	1117
TELEFÓNICA DEL PERÚ S.A.A.	2016-02-01	LA LIBERTAD	Internet fijo	Otros	Presentados	1145
TELEFÓNICA DEL PERÚ S.A.A.	2016-02-01	LORETO	Internet fijo	Servicio no operativo	Presentados	1148
TELEFÓNICA DEL PERÚ S.A.A.	2016-02-01	TACNA	Internet fijo	Otros	Solucionados	1164
TELEFÓNICA DEL PERÚ S.A.A.	2016-02-01	UCAYALI	Internet fijo	Servicio no operativo	Presentados	1194
TELEFÓNICA DEL PERÚ S.A.A.	2016-02-01	CAJAMARCA	Internet fijo	Otros	Solucionados	1208
TELEFÓNICA DEL PERÚ S.A.A.	2016-02-01	SAN MARTÍN	Internet fijo	Servicio no operativo	Presentados	1379
TELEFÓNICA DEL PERÚ S.A.A.	2016-02-01	UCAYALI	Internet fijo	Otros	Solucionados	1474
TELEFÓNICA DEL PERÚ S.A.A.	2016-02-01	LORETO	Internet fijo	Otros	Solucionados	1475
TELEFÓNICA DEL PERÚ S.A.A.	2016-02-01	AYACUCHO	Internet fijo	Servicio no operativo	Presentados	1576
OLO DEL PERÚ S.A.C.	2016-02-01	LIMA Y CALLAO	Internet fijo	Problemas de calidad	Presentados	1641
TELEFÓNICA DEL PERÚ S.A.A.	2016-02-01	AYACUCHO	Internet fijo	Otros	Solucionados	1679
TELEFÓNICA DEL PERÚ S.A.A.	2016-02-01	PUNO	Internet fijo	Servicio no operativo	Presentados	1682
TELEFÓNICA DEL PERÚ S.A.A.	2016-02-01	SAN MARTÍN	Internet fijo	Otros	Solucionados	1710
OLO DEL PERÚ S.A.C.	2016-02-01	LIMA Y CALLAO	Internet fijo	Otros	Solucionados	1762
AMÉRICA MÓVIL PERÚ S.A.C.	2016-02-01	LIMA Y CALLAO	Internet fijo	Otros	Solucionados	1873
TELEFÓNICA DEL PERÚ S.A.A.	2016-02-01	PUNO	Internet fijo	Otros	Solucionados	2055
TELEFÓNICA DEL PERÚ S.A.A.	2016-02-01	ÁNCASH	Internet fijo	Servicio no operativo	Presentados	2611
TELEFÓNICA DEL PERÚ S.A.A.	2016-02-01	ICA	Internet fijo	Servicio no operativo	Presentados	3193
TELEFÓNICA DEL PERÚ S.A.A.	2016-02-01	ÁNCASH	Internet fijo	Otros	Solucionados	3364
TELEFÓNICA DEL PERÚ S.A.A.	2016-02-01	JUNÍN	Internet fijo	Servicio no operativo	Presentados	3841
TELEFÓNICA DEL PERÚ S.A.A.	2016-02-01	ICA	Internet fijo	Otros	Solucionados	3977
TELEFÓNICA DEL PERÚ S.A.A.	2016-02-01	JUNÍN	Internet fijo	Otros	Solucionados	4188
TELEFÓNICA DEL PERÚ S.A.A.	2016-02-01	CUSCO	Internet fijo	Servicio no operativo	Presentados	4553
TELEFÓNICA DEL PERÚ S.A.A.	2016-02-01	LA LIBERTAD	Internet fijo	Servicio no operativo	Presentados	4573
TELEFÓNICA DEL PERÚ S.A.A.	2016-02-01	LAMBAYEQUE	Internet fijo	Servicio no operativo	Presentados	4741
TELEFÓNICA DEL PERÚ S.A.A.	2016-02-01	CUSCO	Internet fijo	Otros	Solucionados	5327
TELEFÓNICA DEL PERÚ S.A.A.	2016-02-01	PIURA	Internet fijo	Servicio no operativo	Presentados	5333
TELEFÓNICA DEL PERÚ S.A.A.	2016-02-01	LAMBAYEQUE	Internet fijo	Otros	Solucionados	5896
AMÉRICA MÓVIL PERÚ S.A.C.	2016-02-01	LIMA Y CALLAO	Internet fijo	Problemas de calidad	Presentados	6088
TELEFÓNICA DEL PERÚ S.A.A.	2016-02-01	PIURA	Internet fijo	Otros	Solucionados	6199
TELEFÓNICA DEL PERÚ S.A.A.	2016-02-01	LA LIBERTAD	Internet fijo	Otros	Solucionados	6213
TELEFÓNICA DEL PERÚ S.A.A.	2016-02-01	AREQUIPA	Internet fijo	Servicio no operativo	Presentados	7220
TELEFÓNICA DEL PERÚ S.A.A.	2016-02-01	AREQUIPA	Internet fijo	Otros	Solucionados	8343
TELEFÓNICA DEL PERÚ S.A.A.	2016-02-01	LIMA Y CALLAO	Internet fijo	Problemas de calidad	Presentados	9052
TELEFÓNICA DEL PERÚ S.A.A.	2016-02-01	LIMA Y CALLAO	Internet fijo	Otros	Presentados	15535
TELEFÓNICA DEL PERÚ S.A.A.	2016-02-01	LIMA Y CALLAO	Internet fijo	Servicio no operativo	Presentados	54119
TELEFÓNICA DEL PERÚ S.A.A.	2016-02-01	LIMA Y CALLAO	Internet fijo	Otros	Solucionados	76082
AMÉRICA MÓVIL PERÚ S.A.C.	2016-02-01	APURÍMAC	Telefonía fija	Problemas de calidad	Presentados	1
AMÉRICA MÓVIL PERÚ S.A.C.	2016-02-01	APURÍMAC	Telefonía fija	Otros	Solucionados	1
AMERICATEL PERÚ S.A.	2016-02-01	LIMA Y CALLAO	Telefonía fija	Problemas de calidad	Presentados	1
GILAT TO HOME PERÚ S.A.	2016-02-01	CUSCO	Telefonía fija	Problemas de calidad	Presentados	1
GILAT TO HOME PERÚ S.A.	2016-02-01	PUNO	Telefonía fija	Problemas de calidad	Presentados	1
GILAT TO HOME PERÚ S.A.	2016-02-01	UCAYALI	Telefonía fija	Problemas de calidad	Presentados	1
GILAT TO HOME PERÚ S.A.	2016-02-01	SAN MARTÍN	Telefonía fija	Servicio no operativo	Presentados	1
GILAT TO HOME PERÚ S.A.	2016-02-01	TACNA	Telefonía fija	Servicio no operativo	Presentados	1
VELATEL PERÚ S.A.C.	2016-02-01	PIURA	Telefonía fija	Problemas de calidad	Presentados	1
WINNER SYSTEMS S.A.C.	2016-02-01	PIURA	Telefonía fija	Servicio no operativo	Presentados	1
AMÉRICA MÓVIL PERÚ S.A.C.	2016-02-01	AMAZONAS	Telefonía fija	Problemas de calidad	Presentados	2
AMÉRICA MÓVIL PERÚ S.A.C.	2016-02-01	PASCO	Telefonía fija	Problemas de calidad	Presentados	2
GILAT TO HOME PERÚ S.A.	2016-02-01	LIMA Y CALLAO	Telefonía fija	Problemas de calidad	Presentados	2
GILAT TO HOME PERÚ S.A.	2016-02-01	PASCO	Telefonía fija	Servicio no operativo	Presentados	2
MOCHE INVERSIONES S.A.	2016-02-01	LIMA Y CALLAO	Telefonía fija	Servicio no operativo	Presentados	2
COMPAÑÍA TELEFÓNICA ANDINA S.A.	2016-02-01	LIMA Y CALLAO	Telefonía fija	Otros	Presentados	3
COMPAÑÍA TELEFÓNICA ANDINA S.A.	2016-02-01	LIMA Y CALLAO	Telefonía fija	Otros	Solucionados	3
MOCHE INVERSIONES S.A.	2016-02-01	LIMA Y CALLAO	Telefonía fija	Otros	Presentados	3
VELATEL PERÚ S.A.C.	2016-02-01	LIMA Y CALLAO	Telefonía fija	Problemas de calidad	Presentados	3
VELATEL PERÚ S.A.C.	2016-02-01	LIMA Y CALLAO	Telefonía fija	Otros	Solucionados	3
VELATEL PERÚ S.A.C.	2016-02-01	LIMA Y CALLAO	Telefonía fija	Problemas de calidad	Presentados	3
VELATEL PERÚ S.A.C.	2016-02-01	LIMA Y CALLAO	Telefonía fija	Otros	Solucionados	3
WINNER SYSTEMS S.A.C.	2016-02-01	PIURA	Telefonía fija	Problemas de calidad	Presentados	4
MOCHE INVERSIONES S.A.	2016-02-01	LIMA Y CALLAO	Telefonía fija	Otros	Solucionados	5
WINNER SYSTEMS S.A.C.	2016-02-01	PIURA	Telefonía fija	Otros	Solucionados	5
GILAT TO HOME PERÚ S.A.	2016-02-01	LORETO	Telefonía fija	Problemas de calidad	Presentados	7
GILAT TO HOME PERÚ S.A.	2016-02-01	LORETO	Telefonía fija	Servicio no operativo	Presentados	8
AMERICATEL PERÚ S.A.	2016-02-01	LIMA Y CALLAO	Telefonía fija	Otros	Solucionados	13
NETLINE PERÚ S.A.	2016-02-01	LIMA Y CALLAO	Telefonía fija	Servicio no operativo	Presentados	14
AMERICATEL PERÚ S.A.	2016-02-01	LIMA Y CALLAO	Telefonía fija	Servicio no operativo	Presentados	17
AMÉRICA MÓVIL PERÚ S.A.C.	2016-02-01	MOQUEGUA	Telefonía fija	Otros	Solucionados	19
AMÉRICA MÓVIL PERÚ S.A.C.	2016-02-01	MOQUEGUA	Telefonía fija	Problemas de calidad	Presentados	24
CONVERGIA PERÚ S.A.	2016-02-01	LIMA Y CALLAO	Telefonía fija	Problemas de calidad	Presentados	26
AMÉRICA MÓVIL PERÚ S.A.C.	2016-02-01	JUNÍN	Telefonía fija	Otros	Solucionados	35
TELEFÓNICA DEL PERÚ S.A.A.	2016-02-01	AMAZONAS	Telefonía fija	Problemas de calidad	Presentados	37
AMÉRICA MÓVIL PERÚ S.A.C.	2016-02-01	UCAYALI	Telefonía fija	Otros	Solucionados	39
AMÉRICA MÓVIL PERÚ S.A.C.	2016-02-01	PUNO	Telefonía fija	Otros	Solucionados	42
AMÉRICA MÓVIL PERÚ S.A.C.	2016-02-01	HUÁNUCO	Telefonía fija	Otros	Solucionados	49
AMÉRICA MÓVIL PERÚ S.A.C.	2016-02-01	TUMBES	Telefonía fija	Otros	Solucionados	50
TELEFÓNICA DEL PERÚ S.A.A.	2016-02-01	AMAZONAS	Telefonía fija	Servicio no operativo	Presentados	56
AMÉRICA MÓVIL PERÚ S.A.C.	2016-02-01	CUSCO	Telefonía fija	Otros	Solucionados	57
NETLINE PERÚ S.A.	2016-02-01	LIMA Y CALLAO	Telefonía fija	Problemas de calidad	Presentados	57
AMÉRICA MÓVIL PERÚ S.A.C.	2016-02-01	MADRE DE DIOS	Telefonía fija	Otros	Solucionados	60
AMÉRICA MÓVIL PERÚ S.A.C.	2016-02-01	CAJAMARCA	Telefonía fija	Otros	Solucionados	62
AMÉRICA MÓVIL PERÚ S.A.C.	2016-02-01	JUNÍN	Telefonía fija	Problemas de calidad	Presentados	74
AMÉRICA MÓVIL PERÚ S.A.C.	2016-02-01	UCAYALI	Telefonía fija	Problemas de calidad	Presentados	79
AMÉRICA MÓVIL PERÚ S.A.C.	2016-02-01	TUMBES	Telefonía fija	Problemas de calidad	Presentados	80
AMÉRICA MÓVIL PERÚ S.A.C.	2016-02-01	ICA	Telefonía fija	Otros	Solucionados	91
TELEFÓNICA DEL PERÚ S.A.A.	2016-02-01	AMAZONAS	Telefonía fija	Otros	Solucionados	91
AMÉRICA MÓVIL PERÚ S.A.C.	2016-02-01	MADRE DE DIOS	Telefonía fija	Problemas de calidad	Presentados	104
AMERICATEL PERÚ S.A.	2016-02-01	LIMA Y CALLAO	Telefonía fija	Problemas de calidad	Presentados	113
AMÉRICA MÓVIL PERÚ S.A.C.	2016-02-01	ÁNCASH	Telefonía fija	Otros	Solucionados	115
AMÉRICA MÓVIL PERÚ S.A.C.	2016-02-01	TACNA	Telefonía fija	Otros	Solucionados	115
AMÉRICA MÓVIL PERÚ S.A.C.	2016-02-01	CUSCO	Telefonía fija	Problemas de calidad	Presentados	119
AMÉRICA MÓVIL PERÚ S.A.C.	2016-02-01	PUNO	Telefonía fija	Problemas de calidad	Presentados	119
AMÉRICA MÓVIL PERÚ S.A.C.	2016-02-01	CAJAMARCA	Telefonía fija	Problemas de calidad	Presentados	122
TELEFÓNICA DEL PERÚ S.A.A.	2016-02-01	HUANCAVELICA	Telefonía fija	Problemas de calidad	Presentados	132
AMÉRICA MÓVIL PERÚ S.A.C.	2016-02-01	HUÁNUCO	Telefonía fija	Problemas de calidad	Presentados	140
TELEFÓNICA DEL PERÚ S.A.A.	2016-02-01	PASCO	Telefonía fija	Problemas de calidad	Presentados	154
TELEFÓNICA DEL PERÚ S.A.A.	2016-02-01	MADRE DE DIOS	Telefonía fija	Problemas de calidad	Presentados	210
AMÉRICA MÓVIL PERÚ S.A.C.	2016-02-01	PIURA	Telefonía fija	Otros	Solucionados	214
AMÉRICA MÓVIL PERÚ S.A.C.	2016-02-01	ICA	Telefonía fija	Problemas de calidad	Presentados	217
AMÉRICA MÓVIL PERÚ S.A.C.	2016-02-01	ÁNCASH	Telefonía fija	Problemas de calidad	Presentados	236
TELEFÓNICA DEL PERÚ S.A.A.	2016-02-01	CAJAMARCA	Telefonía fija	Problemas de calidad	Presentados	261
AMERICATEL PERÚ S.A.	2016-02-01	LIMA Y CALLAO	Telefonía fija	Otros	Solucionados	277
AMERICATEL PERÚ S.A.	2016-02-01	LIMA Y CALLAO	Telefonía fija	Servicio no operativo	Presentados	298
TELEFÓNICA DEL PERÚ S.A.A.	2016-02-01	APURÍMAC	Telefonía fija	Problemas de calidad	Presentados	299
AMÉRICA MÓVIL PERÚ S.A.C.	2016-02-01	LAMBAYEQUE	Telefonía fija	Otros	Solucionados	301
TELEFÓNICA DEL PERÚ S.A.A.	2016-02-01	MADRE DE DIOS	Telefonía fija	Servicio no operativo	Presentados	305
TELEFÓNICA DEL PERÚ S.A.A.	2016-02-01	PASCO	Telefonía fija	Servicio no operativo	Presentados	306
AMÉRICA MÓVIL PERÚ S.A.C.	2016-02-01	AREQUIPA	Telefonía fija	Otros	Solucionados	327
AMÉRICA MÓVIL PERÚ S.A.C.	2016-02-01	TACNA	Telefonía fija	Problemas de calidad	Presentados	338
TELEFÓNICA DEL PERÚ S.A.A.	2016-02-01	HUÁNUCO	Telefonía fija	Problemas de calidad	Presentados	348
TELEFÓNICA DEL PERÚ S.A.A.	2016-02-01	HUANCAVELICA	Telefonía fija	Servicio no operativo	Presentados	362
TELEFÓNICA DEL PERÚ S.A.A.	2016-02-01	TUMBES	Telefonía fija	Problemas de calidad	Presentados	386
AMÉRICA MÓVIL PERÚ S.A.C.	2016-02-01	PIURA	Telefonía fija	Problemas de calidad	Presentados	393
TELEFÓNICA DEL PERÚ S.A.A.	2016-02-01	PUNO	Telefonía fija	Problemas de calidad	Presentados	412
TELEFÓNICA DEL PERÚ S.A.A.	2016-02-01	PASCO	Telefonía fija	Otros	Solucionados	445
TELEFÓNICA DEL PERÚ S.A.A.	2016-02-01	TACNA	Telefonía fija	Problemas de calidad	Presentados	462
TELEFÓNICA DEL PERÚ S.A.A.	2016-02-01	HUANCAVELICA	Telefonía fija	Otros	Solucionados	462
TELEFÓNICA DEL PERÚ S.A.A.	2016-02-01	UCAYALI	Telefonía fija	Problemas de calidad	Presentados	472
TELEFÓNICA DEL PERÚ S.A.A.	2016-02-01	MOQUEGUA	Telefonía fija	Problemas de calidad	Presentados	476
TELEFÓNICA DEL PERÚ S.A.A.	2016-02-01	MADRE DE DIOS	Telefonía fija	Otros	Solucionados	510
AMÉRICA MÓVIL PERÚ S.A.C.	2016-02-01	LA LIBERTAD	Telefonía fija	Otros	Solucionados	525
TELEFÓNICA DEL PERÚ S.A.A.	2016-02-01	AYACUCHO	Telefonía fija	Problemas de calidad	Presentados	531
TELEFÓNICA DEL PERÚ S.A.A.	2016-02-01	APURÍMAC	Telefonía fija	Servicio no operativo	Presentados	573
TELEFÓNICA DEL PERÚ S.A.A.	2016-02-01	LORETO	Telefonía fija	Problemas de calidad	Presentados	626
TELEFÓNICA DEL PERÚ S.A.A.	2016-02-01	SAN MARTÍN	Telefonía fija	Problemas de calidad	Presentados	657
TELEFÓNICA DEL PERÚ S.A.A.	2016-02-01	MOQUEGUA	Telefonía fija	Servicio no operativo	Presentados	663
TELEFÓNICA DEL PERÚ S.A.A.	2016-02-01	TUMBES	Telefonía fija	Servicio no operativo	Presentados	819
AMÉRICA MÓVIL PERÚ S.A.C.	2016-02-01	LAMBAYEQUE	Telefonía fija	Problemas de calidad	Presentados	822
TELEFÓNICA DEL PERÚ S.A.A.	2016-02-01	TACNA	Telefonía fija	Servicio no operativo	Presentados	829
TELEFÓNICA DEL PERÚ S.A.A.	2016-02-01	APURÍMAC	Telefonía fija	Otros	Solucionados	850
TELEFÓNICA DEL PERÚ S.A.A.	2016-02-01	HUÁNUCO	Telefonía fija	Servicio no operativo	Presentados	885
AMÉRICA MÓVIL PERÚ S.A.C.	2016-02-01	AREQUIPA	Telefonía fija	Problemas de calidad	Presentados	997
TELEFÓNICA DEL PERÚ S.A.A.	2016-02-01	CAJAMARCA	Telefonía fija	Servicio no operativo	Presentados	1043
TELEFÓNICA DEL PERÚ S.A.A.	2016-02-01	MOQUEGUA	Telefonía fija	Otros	Solucionados	1122
TELEFÓNICA DEL PERÚ S.A.A.	2016-02-01	TUMBES	Telefonía fija	Otros	Solucionados	1168
TELEFÓNICA DEL PERÚ S.A.A.	2016-02-01	UCAYALI	Telefonía fija	Servicio no operativo	Presentados	1193
TELEFÓNICA DEL PERÚ S.A.A.	2016-02-01	HUÁNUCO	Telefonía fija	Otros	Solucionados	1210
TELEFÓNICA DEL PERÚ S.A.A.	2016-02-01	JUNÍN	Telefonía fija	Problemas de calidad	Presentados	1230
TELEFÓNICA DEL PERÚ S.A.A.	2016-02-01	AYACUCHO	Telefonía fija	Servicio no operativo	Presentados	1250
TELEFÓNICA DEL PERÚ S.A.A.	2016-02-01	SAN MARTÍN	Telefonía fija	Servicio no operativo	Presentados	1275
TELEFÓNICA DEL PERÚ S.A.A.	2016-02-01	LORETO	Telefonía fija	Servicio no operativo	Presentados	1277
TELEFÓNICA DEL PERÚ S.A.A.	2016-02-01	TACNA	Telefonía fija	Otros	Solucionados	1291
TELEFÓNICA DEL PERÚ S.A.A.	2016-02-01	ÁNCASH	Telefonía fija	Problemas de calidad	Presentados	1297
TELEFÓNICA DEL PERÚ S.A.A.	2016-02-01	CAJAMARCA	Telefonía fija	Otros	Solucionados	1304
TELEFÓNICA DEL PERÚ S.A.A.	2016-02-01	CUSCO	Telefonía fija	Problemas de calidad	Presentados	1349
AMÉRICA MÓVIL PERÚ S.A.C.	2016-02-01	LA LIBERTAD	Telefonía fija	Problemas de calidad	Presentados	1476
TELEFÓNICA DEL PERÚ S.A.A.	2016-02-01	ICA	Telefonía fija	Problemas de calidad	Presentados	1541
TELEFÓNICA DEL PERÚ S.A.A.	2016-02-01	UCAYALI	Telefonía fija	Otros	Solucionados	1624
TELEFÓNICA DEL PERÚ S.A.A.	2016-02-01	PUNO	Telefonía fija	Servicio no operativo	Presentados	1750
TELEFÓNICA DEL PERÚ S.A.A.	2016-02-01	AYACUCHO	Telefonía fija	Otros	Solucionados	1760
TELEFÓNICA DEL PERÚ S.A.A.	2016-02-01	LORETO	Telefonía fija	Otros	Solucionados	1872
TELEFÓNICA DEL PERÚ S.A.A.	2016-02-01	SAN MARTÍN	Telefonía fija	Otros	Solucionados	1894
TELEFÓNICA DEL PERÚ S.A.A.	2016-02-01	PUNO	Telefonía fija	Otros	Solucionados	2085
TELEFÓNICA DEL PERÚ S.A.A.	2016-02-01	LAMBAYEQUE	Telefonía fija	Problemas de calidad	Presentados	2144
TELEFÓNICA DEL PERÚ S.A.A.	2016-02-01	PIURA	Telefonía fija	Problemas de calidad	Presentados	2406
TELEFÓNICA DEL PERÚ S.A.A.	2016-02-01	ÁNCASH	Telefonía fija	Servicio no operativo	Presentados	2510
TELEFÓNICA DEL PERÚ S.A.A.	2016-02-01	LA LIBERTAD	Telefonía fija	Problemas de calidad	Presentados	2525
TELEFÓNICA DEL PERÚ S.A.A.	2016-02-01	AREQUIPA	Telefonía fija	Problemas de calidad	Presentados	2638
TELEFÓNICA DEL PERÚ S.A.A.	2016-02-01	ICA	Telefonía fija	Servicio no operativo	Presentados	2891
AMÉRICA MÓVIL PERÚ S.A.C.	2016-02-01	LIMA Y CALLAO	Telefonía fija	Otros	Solucionados	3368
TELEFÓNICA DEL PERÚ S.A.A.	2016-02-01	JUNÍN	Telefonía fija	Servicio no operativo	Presentados	3428
TELEFÓNICA DEL PERÚ S.A.A.	2016-02-01	ÁNCASH	Telefonía fija	Otros	Solucionados	3539
TELEFÓNICA DEL PERÚ S.A.A.	2016-02-01	ICA	Telefonía fija	Otros	Solucionados	4344
TELEFÓNICA DEL PERÚ S.A.A.	2016-02-01	JUNÍN	Telefonía fija	Otros	Solucionados	4410
TELEFÓNICA DEL PERÚ S.A.A.	2016-02-01	CUSCO	Telefonía fija	Servicio no operativo	Presentados	4755
TELEFÓNICA DEL PERÚ S.A.A.	2016-02-01	LAMBAYEQUE	Telefonía fija	Servicio no operativo	Presentados	4920
TELEFÓNICA DEL PERÚ S.A.A.	2016-02-01	LA LIBERTAD	Telefonía fija	Servicio no operativo	Presentados	4986
TELEFÓNICA DEL PERÚ S.A.A.	2016-02-01	PIURA	Telefonía fija	Servicio no operativo	Presentados	5032
TELEFÓNICA DEL PERÚ S.A.A.	2016-02-01	CUSCO	Telefonía fija	Otros	Solucionados	5858
TELEFÓNICA DEL PERÚ S.A.A.	2016-02-01	PIURA	Telefonía fija	Otros	Solucionados	6462
TELEFÓNICA DEL PERÚ S.A.A.	2016-02-01	LAMBAYEQUE	Telefonía fija	Otros	Solucionados	6900
TELEFÓNICA DEL PERÚ S.A.A.	2016-02-01	AREQUIPA	Telefonía fija	Servicio no operativo	Presentados	6911
TELEFÓNICA DEL PERÚ S.A.A.	2016-02-01	LA LIBERTAD	Telefonía fija	Otros	Solucionados	7352
TELEFÓNICA DEL PERÚ S.A.A.	2016-02-01	AREQUIPA	Telefonía fija	Otros	Solucionados	8315
AMÉRICA MÓVIL PERÚ S.A.C.	2016-02-01	LIMA Y CALLAO	Telefonía fija	Problemas de calidad	Presentados	13838
TELEFÓNICA DEL PERÚ S.A.A.	2016-02-01	LIMA Y CALLAO	Telefonía fija	Problemas de calidad	Presentados	40563
TELEFÓNICA DEL PERÚ S.A.A.	2016-02-01	LIMA Y CALLAO	Telefonía fija	Servicio no operativo	Presentados	58941
TELEFÓNICA DEL PERÚ S.A.A.	2016-02-01	LIMA Y CALLAO	Telefonía fija	Otros	Solucionados	96783
GILAT TO HOME PERÚ S.A.	2016-02-01	PIURA	Telefonía de uso público	Problemas de calidad	Presentados	1
GILAT TO HOME PERÚ S.A.	2016-02-01	SAN MARTÍN	Telefonía de uso público	Problemas de calidad	Presentados	1
GILAT TO HOME PERÚ S.A.	2016-02-01	AYACUCHO	Telefonía de uso público	Servicio no operativo	Presentados	1
GILAT TO HOME PERÚ S.A.	2016-02-01	HUÁNUCO	Telefonía de uso público	Servicio no operativo	Presentados	1
GILAT TO HOME PERÚ S.A.	2016-02-01	PUNO	Telefonía de uso público	Servicio no operativo	Presentados	1
GILAT TO HOME PERÚ S.A.	2016-02-01	PIURA	Telefonía de uso público	Otros	Solucionados	1
GILAT TO HOME PERÚ S.A.	2016-02-01	PUNO	Telefonía de uso público	Otros	Solucionados	1
PRISONTEC S.A.C	2016-02-01	ICA	Telefonía de uso público	Servicio no operativo	Presentados	1
TELEFÓNICA DEL PERÚ S.A.A.	2016-02-01	APURÍMAC	Telefonía de uso público	Otros	Presentados	1
TELEFÓNICA DEL PERÚ S.A.A.	2016-02-01	HUANCAVELICA	Telefonía de uso público	Otros	Presentados	1
TELEFÓNICA DEL PERÚ S.A.A.	2016-02-01	MOQUEGUA	Telefonía de uso público	Otros	Presentados	1
TELEFÓNICA DEL PERÚ S.A.A.	2016-02-01	TUMBES	Telefonía de uso público	Otros	Presentados	1
GILAT TO HOME PERÚ S.A.	2016-02-01	AYACUCHO	Telefonía de uso público	Problemas de calidad	Presentados	2
GILAT TO HOME PERÚ S.A.	2016-02-01	CUSCO	Telefonía de uso público	Problemas de calidad	Presentados	2
GILAT TO HOME PERÚ S.A.	2016-02-01	JUNÍN	Telefonía de uso público	Problemas de calidad	Presentados	2
GILAT TO HOME PERÚ S.A.	2016-02-01	AMAZONAS	Telefonía de uso público	Servicio no operativo	Presentados	2
GILAT TO HOME PERÚ S.A.	2016-02-01	AREQUIPA	Telefonía de uso público	Servicio no operativo	Presentados	2
GILAT TO HOME PERÚ S.A.	2016-02-01	CAJAMARCA	Telefonía de uso público	Servicio no operativo	Presentados	2
GILAT TO HOME PERÚ S.A.	2016-02-01	HUANCAVELICA	Telefonía de uso público	Servicio no operativo	Presentados	2
GILAT TO HOME PERÚ S.A.	2016-02-01	AREQUIPA	Telefonía de uso público	Otros	Solucionados	2
GILAT TO HOME PERÚ S.A.	2016-02-01	CAJAMARCA	Telefonía de uso público	Otros	Solucionados	2
WINNER SYSTEMS S.A.C.	2016-02-01	PIURA	Telefonía de uso público	Problemas de calidad	Presentados	2
WINNER SYSTEMS S.A.C.	2016-02-01	PIURA	Telefonía de uso público	Otros	Solucionados	2
GILAT TO HOME PERÚ S.A.	2016-02-01	HUANCAVELICA	Telefonía de uso público	Problemas de calidad	Presentados	3
GILAT TO HOME PERÚ S.A.	2016-02-01	HUÁNUCO	Telefonía de uso público	Problemas de calidad	Presentados	3
GILAT TO HOME PERÚ S.A.	2016-02-01	CUSCO	Telefonía de uso público	Servicio no operativo	Presentados	3
GILAT TO HOME PERÚ S.A.	2016-02-01	UCAYALI	Telefonía de uso público	Servicio no operativo	Presentados	3
GILAT TO HOME PERÚ S.A.	2016-02-01	AYACUCHO	Telefonía de uso público	Otros	Solucionados	3
PRISONTEC S.A.C	2016-02-01	LIMA Y CALLAO	Telefonía de uso público	Servicio no operativo	Presentados	3
TELEFÓNICA DEL PERÚ S.A.A.	2016-02-01	PUNO	Telefonía de uso público	Otros	Presentados	3
GILAT TO HOME PERÚ S.A.	2016-02-01	UCAYALI	Telefonía de uso público	Problemas de calidad	Presentados	4
GILAT TO HOME PERÚ S.A.	2016-02-01	JUNÍN	Telefonía de uso público	Servicio no operativo	Presentados	4
GILAT TO HOME PERÚ S.A.	2016-02-01	SAN MARTÍN	Telefonía de uso público	Servicio no operativo	Presentados	4
GILAT TO HOME PERÚ S.A.	2016-02-01	HUÁNUCO	Telefonía de uso público	Otros	Solucionados	4
GILAT TO HOME PERÚ S.A.	2016-02-01	CUSCO	Telefonía de uso público	Otros	Solucionados	5
GILAT TO HOME PERÚ S.A.	2016-02-01	HUANCAVELICA	Telefonía de uso público	Otros	Solucionados	5
GILAT TO HOME PERÚ S.A.	2016-02-01	SAN MARTÍN	Telefonía de uso público	Otros	Solucionados	5
TELEFÓNICA DEL PERÚ S.A.A.	2016-02-01	AYACUCHO	Telefonía de uso público	Otros	Presentados	5
TELEFÓNICA DEL PERÚ S.A.A.	2016-02-01	CUSCO	Telefonía de uso público	Otros	Presentados	5
TELEFÓNICA DEL PERÚ S.A.A.	2016-02-01	HUÁNUCO	Telefonía de uso público	Otros	Presentados	5
GILAT TO HOME PERÚ S.A.	2016-02-01	AMAZONAS	Telefonía de uso público	Problemas de calidad	Presentados	6
GILAT TO HOME PERÚ S.A.	2016-02-01	JUNÍN	Telefonía de uso público	Otros	Solucionados	6
TELEFÓNICA DEL PERÚ S.A.A.	2016-02-01	CAJAMARCA	Telefonía de uso público	Otros	Presentados	6
TELEFÓNICA DEL PERÚ S.A.A.	2016-02-01	SAN MARTÍN	Telefonía de uso público	Otros	Presentados	6
GILAT TO HOME PERÚ S.A.	2016-02-01	UCAYALI	Telefonía de uso público	Otros	Solucionados	7
GILAT TO HOME PERÚ S.A.	2016-02-01	AMAZONAS	Telefonía de uso público	Otros	Solucionados	8
TELEFÓNICA DEL PERÚ S.A.A.	2016-02-01	ICA	Telefonía de uso público	Otros	Presentados	9
GILAT TO HOME PERÚ S.A.	2016-02-01	LORETO	Telefonía de uso público	Problemas de calidad	Presentados	10
TELEFÓNICA DEL PERÚ S.A.A.	2016-02-01	AREQUIPA	Telefonía de uso público	Otros	Presentados	11
TELEFÓNICA DEL PERÚ S.A.A.	2016-02-01	UCAYALI	Telefonía de uso público	Otros	Presentados	13
TELEFÓNICA DEL PERÚ S.A.A.	2016-02-01	PASCO	Telefonía de uso público	Problemas de calidad	Presentados	15
TELEFÓNICA DEL PERÚ S.A.A.	2016-02-01	AMAZONAS	Telefonía de uso público	Problemas de calidad	Presentados	17
TELEFÓNICA DEL PERÚ S.A.A.	2016-02-01	LORETO	Telefonía de uso público	Otros	Presentados	17
GILAT TO HOME PERÚ S.A.	2016-02-01	LORETO	Telefonía de uso público	Servicio no operativo	Presentados	18
TELEFÓNICA DEL PERÚ S.A.A.	2016-02-01	PASCO	Telefonía de uso público	Servicio no operativo	Presentados	21
TELEFÓNICA DEL PERÚ S.A.A.	2016-02-01	ÁNCASH	Telefonía de uso público	Otros	Presentados	24
TELEFÓNICA DEL PERÚ S.A.A.	2016-02-01	AMAZONAS	Telefonía de uso público	Servicio no operativo	Presentados	26
GILAT TO HOME PERÚ S.A.	2016-02-01	LORETO	Telefonía de uso público	Otros	Solucionados	28
TELEFÓNICA DEL PERÚ S.A.A.	2016-02-01	JUNÍN	Telefonía de uso público	Otros	Presentados	28
TELEFÓNICA DEL PERÚ S.A.A.	2016-02-01	LA LIBERTAD	Telefonía de uso público	Otros	Presentados	30
TELEFÓNICA DEL PERÚ S.A.A.	2016-02-01	PASCO	Telefonía de uso público	Otros	Solucionados	35
TELEFÓNICA DEL PERÚ S.A.A.	2016-02-01	HUANCAVELICA	Telefonía de uso público	Problemas de calidad	Presentados	39
TELEFÓNICA DEL PERÚ S.A.A.	2016-02-01	LAMBAYEQUE	Telefonía de uso público	Otros	Presentados	40
TELEFÓNICA DEL PERÚ S.A.A.	2016-02-01	AMAZONAS	Telefonía de uso público	Otros	Solucionados	42
TELEFÓNICA DEL PERÚ S.A.A.	2016-02-01	APURÍMAC	Telefonía de uso público	Problemas de calidad	Presentados	66
TELEFÓNICA DEL PERÚ S.A.A.	2016-02-01	HUANCAVELICA	Telefonía de uso público	Servicio no operativo	Presentados	70
TELEFÓNICA DEL PERÚ S.A.A.	2016-02-01	PIURA	Telefonía de uso público	Otros	Presentados	78
TELEFÓNICA DEL PERÚ S.A.A.	2016-02-01	MADRE DE DIOS	Telefonía de uso público	Problemas de calidad	Presentados	80
TELEFÓNICA DEL PERÚ S.A.A.	2016-02-01	MOQUEGUA	Telefonía de uso público	Problemas de calidad	Presentados	88
TELEFÓNICA DEL PERÚ S.A.A.	2016-02-01	APURÍMAC	Telefonía de uso público	Servicio no operativo	Presentados	88
TELEFÓNICA DEL PERÚ S.A.A.	2016-02-01	HUÁNUCO	Telefonía de uso público	Problemas de calidad	Presentados	104
TELEFÓNICA DEL PERÚ S.A.A.	2016-02-01	HUANCAVELICA	Telefonía de uso público	Otros	Solucionados	109
TELEFÓNICA DEL PERÚ S.A.A.	2016-02-01	TACNA	Telefonía de uso público	Problemas de calidad	Presentados	111
TELEFÓNICA DEL PERÚ S.A.A.	2016-02-01	PUNO	Telefonía de uso público	Problemas de calidad	Presentados	119
TELEFÓNICA DEL PERÚ S.A.A.	2016-02-01	TUMBES	Telefonía de uso público	Problemas de calidad	Presentados	127
TELEFÓNICA DEL PERÚ S.A.A.	2016-02-01	AYACUCHO	Telefonía de uso público	Problemas de calidad	Presentados	139
TELEFÓNICA DEL PERÚ S.A.A.	2016-02-01	HUÁNUCO	Telefonía de uso público	Servicio no operativo	Presentados	143
TELEFÓNICA DEL PERÚ S.A.A.	2016-02-01	CAJAMARCA	Telefonía de uso público	Problemas de calidad	Presentados	147
TELEFÓNICA DEL PERÚ S.A.A.	2016-02-01	PUNO	Telefonía de uso público	Servicio no operativo	Presentados	150
TELEFÓNICA DEL PERÚ S.A.A.	2016-02-01	APURÍMAC	Telefonía de uso público	Otros	Solucionados	150
TELEFÓNICA DEL PERÚ S.A.A.	2016-02-01	MADRE DE DIOS	Telefonía de uso público	Servicio no operativo	Presentados	195
TELEFÓNICA DEL PERÚ S.A.A.	2016-02-01	UCAYALI	Telefonía de uso público	Problemas de calidad	Presentados	203
TELEFÓNICA DEL PERÚ S.A.A.	2016-02-01	SAN MARTÍN	Telefonía de uso público	Problemas de calidad	Presentados	225
TELEFÓNICA DEL PERÚ S.A.A.	2016-02-01	CAJAMARCA	Telefonía de uso público	Servicio no operativo	Presentados	229
TELEFÓNICA DEL PERÚ S.A.A.	2016-02-01	MOQUEGUA	Telefonía de uso público	Servicio no operativo	Presentados	231
TELEFÓNICA DEL PERÚ S.A.A.	2016-02-01	HUÁNUCO	Telefonía de uso público	Otros	Solucionados	249
TELEFÓNICA DEL PERÚ S.A.A.	2016-02-01	TUMBES	Telefonía de uso público	Servicio no operativo	Presentados	260
TELEFÓNICA DEL PERÚ S.A.A.	2016-02-01	PUNO	Telefonía de uso público	Otros	Solucionados	265
TELEFÓNICA DEL PERÚ S.A.A.	2016-02-01	MADRE DE DIOS	Telefonía de uso público	Otros	Solucionados	266
TELEFÓNICA DEL PERÚ S.A.A.	2016-02-01	MOQUEGUA	Telefonía de uso público	Otros	Solucionados	319
TELEFÓNICA DEL PERÚ S.A.A.	2016-02-01	AYACUCHO	Telefonía de uso público	Servicio no operativo	Presentados	328
TELEFÓNICA DEL PERÚ S.A.A.	2016-02-01	CUSCO	Telefonía de uso público	Problemas de calidad	Presentados	358
TELEFÓNICA DEL PERÚ S.A.A.	2016-02-01	CAJAMARCA	Telefonía de uso público	Otros	Solucionados	377
TELEFÓNICA DEL PERÚ S.A.A.	2016-02-01	TUMBES	Telefonía de uso público	Otros	Solucionados	385
TELEFÓNICA DEL PERÚ S.A.A.	2016-02-01	SAN MARTÍN	Telefonía de uso público	Servicio no operativo	Presentados	391
TELEFÓNICA DEL PERÚ S.A.A.	2016-02-01	TACNA	Telefonía de uso público	Servicio no operativo	Presentados	392
TELEFÓNICA DEL PERÚ S.A.A.	2016-02-01	AYACUCHO	Telefonía de uso público	Otros	Solucionados	466
TELEFÓNICA DEL PERÚ S.A.A.	2016-02-01	LIMA Y CALLAO	Telefonía de uso público	Otros	Presentados	467
TELEFÓNICA DEL PERÚ S.A.A.	2016-02-01	UCAYALI	Telefonía de uso público	Servicio no operativo	Presentados	489
TELEFÓNICA DEL PERÚ S.A.A.	2016-02-01	TACNA	Telefonía de uso público	Otros	Solucionados	502
TELEFÓNICA DEL PERÚ S.A.A.	2016-02-01	ICA	Telefonía de uso público	Problemas de calidad	Presentados	564
TELEFÓNICA DEL PERÚ S.A.A.	2016-02-01	ÁNCASH	Telefonía de uso público	Problemas de calidad	Presentados	598
TELEFÓNICA DEL PERÚ S.A.A.	2016-02-01	LORETO	Telefonía de uso público	Problemas de calidad	Presentados	599
TELEFÓNICA DEL PERÚ S.A.A.	2016-02-01	SAN MARTÍN	Telefonía de uso público	Otros	Solucionados	610
TELEFÓNICA DEL PERÚ S.A.A.	2016-02-01	CUSCO	Telefonía de uso público	Servicio no operativo	Presentados	679
TELEFÓNICA DEL PERÚ S.A.A.	2016-02-01	UCAYALI	Telefonía de uso público	Otros	Solucionados	693
TELEFÓNICA DEL PERÚ S.A.A.	2016-02-01	AREQUIPA	Telefonía de uso público	Problemas de calidad	Presentados	792
TELEFÓNICA DEL PERÚ S.A.A.	2016-02-01	JUNÍN	Telefonía de uso público	Problemas de calidad	Presentados	802
TELEFÓNICA DEL PERÚ S.A.A.	2016-02-01	ICA	Telefonía de uso público	Servicio no operativo	Presentados	854
TELEFÓNICA DEL PERÚ S.A.A.	2016-02-01	LAMBAYEQUE	Telefonía de uso público	Problemas de calidad	Presentados	928
TELEFÓNICA DEL PERÚ S.A.A.	2016-02-01	ÁNCASH	Telefonía de uso público	Servicio no operativo	Presentados	943
TELEFÓNICA DEL PERÚ S.A.A.	2016-02-01	CUSCO	Telefonía de uso público	Otros	Solucionados	994
TELEFÓNICA DEL PERÚ S.A.A.	2016-02-01	LA LIBERTAD	Telefonía de uso público	Problemas de calidad	Presentados	1041
TELEFÓNICA DEL PERÚ S.A.A.	2016-02-01	PIURA	Telefonía de uso público	Problemas de calidad	Presentados	1054
TELEFÓNICA DEL PERÚ S.A.A.	2016-02-01	LORETO	Telefonía de uso público	Servicio no operativo	Presentados	1067
TELEFÓNICA DEL PERÚ S.A.A.	2016-02-01	JUNÍN	Telefonía de uso público	Servicio no operativo	Presentados	1095
TELEFÓNICA DEL PERÚ S.A.A.	2016-02-01	AREQUIPA	Telefonía de uso público	Servicio no operativo	Presentados	1358
TELEFÓNICA DEL PERÚ S.A.A.	2016-02-01	ICA	Telefonía de uso público	Otros	Solucionados	1419
TELEFÓNICA DEL PERÚ S.A.A.	2016-02-01	ÁNCASH	Telefonía de uso público	Otros	Solucionados	1536
TELEFÓNICA DEL PERÚ S.A.A.	2016-02-01	LAMBAYEQUE	Telefonía de uso público	Servicio no operativo	Presentados	1558
TELEFÓNICA DEL PERÚ S.A.A.	2016-02-01	LORETO	Telefonía de uso público	Otros	Solucionados	1664
TELEFÓNICA DEL PERÚ S.A.A.	2016-02-01	LA LIBERTAD	Telefonía de uso público	Servicio no operativo	Presentados	1720
TELEFÓNICA DEL PERÚ S.A.A.	2016-02-01	JUNÍN	Telefonía de uso público	Otros	Solucionados	1913
TELEFÓNICA DEL PERÚ S.A.A.	2016-02-01	AREQUIPA	Telefonía de uso público	Otros	Solucionados	2094
TELEFÓNICA DEL PERÚ S.A.A.	2016-02-01	PIURA	Telefonía de uso público	Servicio no operativo	Presentados	2111
TELEFÓNICA DEL PERÚ S.A.A.	2016-02-01	LAMBAYEQUE	Telefonía de uso público	Otros	Solucionados	2491
TELEFÓNICA DEL PERÚ S.A.A.	2016-02-01	LA LIBERTAD	Telefonía de uso público	Otros	Solucionados	2743
TELEFÓNICA DEL PERÚ S.A.A.	2016-02-01	PIURA	Telefonía de uso público	Otros	Solucionados	3159
TELEFÓNICA DEL PERÚ S.A.A.	2016-02-01	LIMA Y CALLAO	Telefonía de uso público	Problemas de calidad	Presentados	7966
TELEFÓNICA DEL PERÚ S.A.A.	2016-02-01	LIMA Y CALLAO	Telefonía de uso público	Servicio no operativo	Presentados	15899
TELEFÓNICA DEL PERÚ S.A.A.	2016-02-01	LIMA Y CALLAO	Telefonía de uso público	Otros	Solucionados	23754
TELE STAR AMAZONAS S.R.L	2016-02-01	LORETO	Televisión de paga	Problemas de calidad	Presentados	1
TELEFÓNICA DEL PERÚ S.A.A.	2016-02-01	LIMA Y CALLAO	Televisión de paga	Otros	Presentados	1
TELEFÓNICA MULTIMEDIA S.A.C	2016-02-01	LIMA Y CALLAO	Televisión de paga	Otros	Presentados	1
TELEVISION SATELITAL CONCEPCION S.R.L.	2016-02-01	JUNÍN	Televisión de paga	Otros	Presentados	1
TELEVISION SATELITAL CONCEPCION S.R.L.	2016-02-01	JUNÍN	Televisión de paga	Otros	Solucionados	1
TODO TV VILLA RICA S.R.L	2016-02-01	PASCO	Televisión de paga	Servicio no operativo	Presentados	1
WIDMAR PINEDO NOLORBE	2016-02-01	SAN MARTÍN	Televisión de paga	Problemas de calidad	Presentados	1
AMÉRICA MÓVIL PERÚ S.A.C.	2016-02-01	PASCO	Televisión de paga	Otros	Solucionados	2
CATV SYSTEMS E.I.R.L.	2016-02-01	ÁNCASH	Televisión de paga	Problemas de calidad	Presentados	2
FRANCISCO HUGO MENA TIPTO	2016-02-01	CUSCO	Televisión de paga	Otros	Solucionados	2
SOTELO & MOTALVAN	2016-02-01	PIURA	Televisión de paga	Otros	Presentados	2
TELE STAR AMAZONAS S.R.L	2016-02-01	LORETO	Televisión de paga	Otros	Presentados	2
TODO TV VILLA RICA S.R.L	2016-02-01	PASCO	Televisión de paga	Problemas de calidad	Presentados	2
TV SAT KABEL S.R.L.	2016-02-01	ICA	Televisión de paga	Servicio no operativo	Presentados	2
CABLE JAÉN S.R.L	2016-02-01	CAJAMARCA	Televisión de paga	Otros	Presentados	3
CATV SYSTEMS E.I.R.L.	2016-02-01	ÁNCASH	Televisión de paga	Servicio no operativo	Presentados	3
FLOR DE MARÍA GUERRA VELA	2016-02-01	SAN MARTÍN	Televisión de paga	Problemas de calidad	Presentados	3
FLOR DE MARÍA GUERRA VELA	2016-02-01	SAN MARTÍN	Televisión de paga	Otros	Solucionados	3
GERMÁN AIQUE VARGAS	2016-02-01	SAN MARTÍN	Televisión de paga	Problemas de calidad	Presentados	3
GERMÁN AIQUE VARGAS	2016-02-01	SAN MARTÍN	Televisión de paga	Otros	Solucionados	3
TELE STAR AMAZONAS S.R.L	2016-02-01	LORETO	Televisión de paga	Otros	Solucionados	3
TODO TV VILLA RICA S.R.L	2016-02-01	PASCO	Televisión de paga	Otros	Solucionados	3
TV SAT KABEL S.R.L.	2016-02-01	ICA	Televisión de paga	Otros	Presentados	3
AMAZONIA T.V. S.R.LTDA	2016-02-01	SAN MARTÍN	Televisión de paga	Problemas de calidad	Presentados	4
AMÉRICA MÓVIL PERÚ S.A.C.	2016-02-01	HUANCAVELICA	Televisión de paga	Otros	Solucionados	4
AMÉRICA MÓVIL PERÚ S.A.C.	2016-02-01	LORETO	Televisión de paga	Otros	Solucionados	4
CATV SYSTEMS E.I.R.L.	2016-02-01	LAMBAYEQUE	Televisión de paga	Problemas de calidad	Presentados	4
CATV SYSTEMS E.I.R.L.	2016-02-01	LAMBAYEQUE	Televisión de paga	Servicio no operativo	Presentados	4
RED DE COMUNICACIONES DIGITALES S.A.C.	2016-02-01	SAN MARTÍN	Televisión de paga	Problemas de calidad	Presentados	4
RED DE COMUNICACIONES DIGITALES S.A.C.	2016-02-01	SAN MARTÍN	Televisión de paga	Otros	Solucionados	4
RICARDO MARIO QUISPE CHOCCE	2016-02-01	JUNÍN	Televisión de paga	Problemas de calidad	Presentados	4
RICARDO MARIO QUISPE CHOCCE	2016-02-01	JUNÍN	Televisión de paga	Otros	Solucionados	4
AMAZONIA T.V. S.R.LTDA	2016-02-01	SAN MARTÍN	Televisión de paga	Otros	Presentados	5
CATV SYSTEMS E.I.R.L.	2016-02-01	ÁNCASH	Televisión de paga	Otros	Solucionados	5
HUASCARAN TELECOM S.A.C.	2016-02-01	ÁNCASH	Televisión de paga	Otros	Presentados	5
OMNISAT CABLE TELEVISION S.R.L.	2016-02-01	PIURA	Televisión de paga	Problemas de calidad	Presentados	5
TV SAT KABEL S.R.L.	2016-02-01	ICA	Televisión de paga	Otros	Solucionados	5
SOTELO & MOTALVAN	2016-02-01	PIURA	Televisión de paga	Problemas de calidad	Presentados	6
TV CABLE CATACAOS E.I.R.L.	2016-02-01	PIURA	Televisión de paga	Otros	Presentados	6
TV CABLE CATACAOS E.I.R.L.	2016-02-01	PIURA	Televisión de paga	Otros	Solucionados	6
AMÉRICA MÓVIL PERÚ S.A.C.	2016-02-01	AMAZONAS	Televisión de paga	Otros	Solucionados	7
AMÉRICA MÓVIL PERÚ S.A.C.	2016-02-01	APURÍMAC	Televisión de paga	Otros	Solucionados	7
CATV SYSTEMS E.I.R.L.	2016-02-01	LIMA Y CALLAO	Televisión de paga	Servicio no operativo	Presentados	7
AMÉRICA MÓVIL PERÚ S.A.C.	2016-02-01	AYACUCHO	Televisión de paga	Otros	Solucionados	8
CATV SYSTEMS E.I.R.L.	2016-02-01	LAMBAYEQUE	Televisión de paga	Otros	Solucionados	8
SOTELO & MOTALVAN	2016-02-01	PIURA	Televisión de paga	Otros	Solucionados	8
AMAZONIA T.V. S.R.LTDA	2016-02-01	SAN MARTÍN	Televisión de paga	Otros	Solucionados	9
MICROSYSTEM NET COMUNICACIONES E.I.R.L.	2016-02-01	UCAYALI	Televisión de paga	Problemas de calidad	Presentados	9
OMNISAT CABLE TELEVISION S.R.L.	2016-02-01	PIURA	Televisión de paga	Otros	Presentados	9
CABLE ORIENTE S.A	2016-02-01	UCAYALI	Televisión de paga	Otros	Presentados	10
CATV SYSTEMS E.I.R.L.	2016-02-01	LIMA Y CALLAO	Televisión de paga	Problemas de calidad	Presentados	10
DIRECTV PERU S.R.L	2016-02-01	TUMBES	Televisión de paga	Otros	Solucionados	10
ELVIS CIRINEO LEON MONTERO	2016-02-01	JUNÍN	Televisión de paga	Problemas de calidad	Presentados	10
ELVIS CIRINEO LEON MONTERO	2016-02-01	JUNÍN	Televisión de paga	Otros	Solucionados	10
RED INTERCABLE PERU S.A.C.	2016-02-01	HUANCAVELICA	Televisión de paga	Problemas de calidad	Presentados	10
RED INTERCABLE PERU S.A.C.	2016-02-01	HUANCAVELICA	Televisión de paga	Otros	Solucionados	10
VIVIANA MARINA RODRÍGUEZ VIENA	2016-02-01	MOQUEGUA	Televisión de paga	Problemas de calidad	Presentados	10
VIVIANA MARINA RODRÍGUEZ VIENA	2016-02-01	MOQUEGUA	Televisión de paga	Otros	Solucionados	10
MICROSYSTEM NET COMUNICACIONES E.I.R.L.	2016-02-01	UCAYALI	Televisión de paga	Otros	Presentados	11
AMÉRICA MÓVIL PERÚ S.A.C.	2016-02-01	MADRE DE DIOS	Televisión de paga	Otros	Solucionados	12
AMÉRICA MÓVIL PERÚ S.A.C.	2016-02-01	MOQUEGUA	Televisión de paga	Otros	Solucionados	12
DIRECTV PERU S.R.L	2016-02-01	MOQUEGUA	Televisión de paga	Otros	Solucionados	12
HOMETV S.A.C.	2016-02-01	CAJAMARCA	Televisión de paga	Problemas de calidad	Presentados	12
TELEVISION POR CABLE EL DORADO E.I.R.L	2016-02-01	SAN MARTÍN	Televisión de paga	Problemas de calidad	Presentados	12
TELEVISION POR CABLE EL DORADO E.I.R.L	2016-02-01	SAN MARTÍN	Televisión de paga	Otros	Solucionados	12
AMÉRICA MÓVIL PERÚ S.A.C.	2016-02-01	HUÁNUCO	Televisión de paga	Otros	Solucionados	13
AMÉRICA MÓVIL PERÚ S.A.C.	2016-02-01	SAN MARTÍN	Televisión de paga	Otros	Solucionados	13
CABLEMAX E.I.R.L	2016-02-01	PIURA	Televisión de paga	Problemas de calidad	Presentados	13
CABLEMAX E.I.R.L	2016-02-01	PIURA	Televisión de paga	Otros	Solucionados	13
DIRECTV PERU S.R.L	2016-02-01	TUMBES	Televisión de paga	Problemas de calidad	Presentados	13
DIRECTV PERU S.R.L	2016-02-01	TACNA	Televisión de paga	Otros	Solucionados	13
HOMETV S.A.C.	2016-02-01	CAJAMARCA	Televisión de paga	Otros	Presentados	13
HOMETV S.A.C.	2016-02-01	LAMBAYEQUE	Televisión de paga	Otros	Presentados	13
INVERSIONES Y REPRESENTACIONES DOBLE C E.I.R.L.	2016-02-01	LORETO	Televisión de paga	Problemas de calidad	Presentados	13
INVERSIONES Y REPRESENTACIONES DOBLE C E.I.R.L.	2016-02-01	LORETO	Televisión de paga	Otros	Solucionados	13
COMUNICACIONES PORCÓN S.A.C.	2016-02-01	CAJAMARCA	Televisión de paga	Otros	Presentados	14
DIRECTV PERU S.R.L	2016-02-01	HUÁNUCO	Televisión de paga	Otros	Solucionados	14
DKR VISION S.R.L.	2016-02-01	ÁNCASH	Televisión de paga	Problemas de calidad	Presentados	15
JHON ANDERSON PEÑALOZA QUINTANILLA	2016-02-01	JUNÍN	Televisión de paga	Problemas de calidad	Presentados	15
JHON ANDERSON PEÑALOZA QUINTANILLA	2016-02-01	JUNÍN	Televisión de paga	Otros	Solucionados	15
HOMETV S.A.C.	2016-02-01	LAMBAYEQUE	Televisión de paga	Problemas de calidad	Presentados	16
TELEFÓNICA DEL PERÚ S.A.A.	2016-02-01	ICA	Televisión de paga	Servicio no operativo	Presentados	16
TELEFÓNICA MULTIMEDIA S.A.C	2016-02-01	ICA	Televisión de paga	Servicio no operativo	Presentados	16
CATV SYSTEMS E.I.R.L.	2016-02-01	LIMA Y CALLAO	Televisión de paga	Otros	Solucionados	17
DKR VISION S.R.L.	2016-02-01	ÁNCASH	Televisión de paga	Servicio no operativo	Presentados	17
TELECOMUNICACIONES MARINO E.I.R.L	2016-02-01	LIMA Y CALLAO	Televisión de paga	Otros	Presentados	17
TELECOMUNICACIONES MARINO E.I.R.L	2016-02-01	LIMA Y CALLAO	Televisión de paga	Otros	Solucionados	17
AMÉRICA MÓVIL PERÚ S.A.C.	2016-02-01	PASCO	Televisión de paga	Problemas de calidad	Presentados	19
AMÉRICA MÓVIL PERÚ S.A.C.	2016-02-01	CUSCO	Televisión de paga	Otros	Solucionados	19
DIRECTV PERU S.R.L	2016-02-01	SAN MARTÍN	Televisión de paga	Otros	Solucionados	19
ANIBAL ESTRELLA CARTAGENA	2016-02-01	SAN MARTÍN	Televisión de paga	Problemas de calidad	Presentados	20
MICROSYSTEM NET COMUNICACIONES E.I.R.L.	2016-02-01	UCAYALI	Televisión de paga	Otros	Solucionados	20
RED INTERCABLE PERU S.A.C.	2016-02-01	JUNÍN	Televisión de paga	Problemas de calidad	Presentados	20
RED INTERCABLE PERU S.A.C.	2016-02-01	JUNÍN	Televisión de paga	Otros	Solucionados	20
DIRECTV PERU S.R.L	2016-02-01	AMAZONAS	Televisión de paga	Otros	Solucionados	22
DIRECTV PERU S.R.L	2016-02-01	HUANCAVELICA	Televisión de paga	Otros	Solucionados	22
AMÉRICA MÓVIL PERÚ S.A.C.	2016-02-01	UCAYALI	Televisión de paga	Otros	Solucionados	23
DIRECTV PERU S.R.L	2016-02-01	HUÁNUCO	Televisión de paga	Problemas de calidad	Presentados	23
DIRECTV PERU S.R.L	2016-02-01	APURÍMAC	Televisión de paga	Otros	Solucionados	23
DIRECTV PERU S.R.L	2016-02-01	PASCO	Televisión de paga	Otros	Solucionados	24
AMÉRICA MÓVIL PERÚ S.A.C.	2016-02-01	HUANCAVELICA	Televisión de paga	Problemas de calidad	Presentados	25
HOMETV S.A.C.	2016-02-01	CAJAMARCA	Televisión de paga	Otros	Solucionados	25
DIRECTV PERU S.R.L	2016-02-01	UCAYALI	Televisión de paga	Otros	Solucionados	26
INVERSIONES MOTUX SOCIEDAD ANONIMA CERRADA	2016-02-01	LAMBAYEQUE	Televisión de paga	Problemas de calidad	Presentados	26
INVERSIONES MOTUX SOCIEDAD ANONIMA CERRADA	2016-02-01	LAMBAYEQUE	Televisión de paga	Otros	Solucionados	26
TELEFÓNICA DEL PERÚ S.A.A.	2016-02-01	AMAZONAS	Televisión de paga	Otros	Solucionados	26
TELEFÓNICA MULTIMEDIA S.A.C	2016-02-01	AMAZONAS	Televisión de paga	Otros	Solucionados	26
AMÉRICA MÓVIL PERÚ S.A.C.	2016-02-01	PUNO	Televisión de paga	Otros	Solucionados	28
DIRECTV PERU S.R.L	2016-02-01	MOQUEGUA	Televisión de paga	Problemas de calidad	Presentados	28
DIRECTV PERU S.R.L	2016-02-01	ÁNCASH	Televisión de paga	Otros	Solucionados	28
HOMETV S.A.C.	2016-02-01	LAMBAYEQUE	Televisión de paga	Otros	Solucionados	29
SEÑAL DIGITAL LATINA S.A.C	2016-02-01	LIMA Y CALLAO	Televisión de paga	Servicio no operativo	Presentados	29
KTV CABLE S.A.C.	2016-02-01	LIMA Y CALLAO	Televisión de paga	Problemas de calidad	Presentados	30
AMÉRICA MÓVIL PERÚ S.A.C.	2016-02-01	ÁNCASH	Televisión de paga	Otros	Solucionados	31
AMÉRICA MÓVIL PERÚ S.A.C.	2016-02-01	TUMBES	Televisión de paga	Otros	Solucionados	31
CABLE ORIENTE S.A	2016-02-01	UCAYALI	Televisión de paga	Problemas de calidad	Presentados	31
TELEFÓNICA DEL PERÚ S.A.A.	2016-02-01	AMAZONAS	Televisión de paga	Problemas de calidad	Presentados	31
TELEFÓNICA MULTIMEDIA S.A.C	2016-02-01	AMAZONAS	Televisión de paga	Problemas de calidad	Presentados	31
AMÉRICA MÓVIL PERÚ S.A.C.	2016-02-01	CAJAMARCA	Televisión de paga	Otros	Solucionados	32
DKR VISION S.R.L.	2016-02-01	ÁNCASH	Televisión de paga	Otros	Presentados	32
KTV CABLE S.A.C.	2016-02-01	LIMA Y CALLAO	Televisión de paga	Servicio no operativo	Presentados	33
DIRECTV PERU S.R.L	2016-02-01	TACNA	Televisión de paga	Problemas de calidad	Presentados	34
TELEFÓNICA DEL PERÚ S.A.A.	2016-02-01	PASCO	Televisión de paga	Otros	Solucionados	34
TELEFÓNICA MULTIMEDIA S.A.C	2016-02-01	PASCO	Televisión de paga	Otros	Solucionados	34
BASILES ARÉVALO FLORES	2016-02-01	SAN MARTÍN	Televisión de paga	Problemas de calidad	Presentados	35
DIRECTV PERU S.R.L	2016-02-01	PASCO	Televisión de paga	Problemas de calidad	Presentados	35
TELECOMUNICACIONES FUTURO GROUP S.R.L	2016-02-01	ÁNCASH	Televisión de paga	Otros	Presentados	35
TELECOMUNICACIONES FUTURO GROUP S.R.L	2016-02-01	ÁNCASH	Televisión de paga	Otros	Solucionados	35
TELEFÓNICA DEL PERÚ S.A.A.	2016-02-01	PASCO	Televisión de paga	Problemas de calidad	Presentados	35
TELEFÓNICA MULTIMEDIA S.A.C	2016-02-01	PASCO	Televisión de paga	Problemas de calidad	Presentados	35
AMÉRICA MÓVIL PERÚ S.A.C.	2016-02-01	JUNÍN	Televisión de paga	Otros	Solucionados	36
DIRECTV PERU S.R.L	2016-02-01	HUANCAVELICA	Televisión de paga	Problemas de calidad	Presentados	37
DIRECTV PERU S.R.L	2016-02-01	CAJAMARCA	Televisión de paga	Otros	Solucionados	37
AMÉRICA MÓVIL PERÚ S.A.C.	2016-02-01	MADRE DE DIOS	Televisión de paga	Problemas de calidad	Presentados	38
TELEFÓNICA DEL PERÚ S.A.A.	2016-02-01	HUANCAVELICA	Televisión de paga	Otros	Solucionados	38
TELEFÓNICA MULTIMEDIA S.A.C	2016-02-01	HUANCAVELICA	Televisión de paga	Otros	Solucionados	38
AMÉRICA MÓVIL PERÚ S.A.C.	2016-02-01	TACNA	Televisión de paga	Otros	Solucionados	39
TELEFÓNICA DEL PERÚ S.A.A.	2016-02-01	HUANCAVELICA	Televisión de paga	Problemas de calidad	Presentados	39
TELEFÓNICA MULTIMEDIA S.A.C	2016-02-01	HUANCAVELICA	Televisión de paga	Problemas de calidad	Presentados	39
CECTEL E.I.R.L.	2016-02-01	SAN MARTÍN	Televisión de paga	Problemas de calidad	Presentados	40
DIRECTV PERU S.R.L	2016-02-01	UCAYALI	Televisión de paga	Problemas de calidad	Presentados	40
DIRECTV PERU S.R.L	2016-02-01	SAN MARTÍN	Televisión de paga	Problemas de calidad	Presentados	41
DIRECTV PERU S.R.L	2016-02-01	AYACUCHO	Televisión de paga	Otros	Solucionados	42
DIRECTV PERU S.R.L	2016-02-01	JUNÍN	Televisión de paga	Otros	Solucionados	42
DIRECTV PERU S.R.L	2016-02-01	LORETO	Televisión de paga	Otros	Solucionados	42
DIRECTV PERU S.R.L	2016-02-01	MADRE DE DIOS	Televisión de paga	Otros	Solucionados	42
DIRECTV PERU S.R.L	2016-02-01	APURÍMAC	Televisión de paga	Problemas de calidad	Presentados	45
TELECABLE PAITA S.R.L.	2016-02-01	PIURA	Televisión de paga	Problemas de calidad	Presentados	45
TELECABLE PAITA S.R.L.	2016-02-01	PIURA	Televisión de paga	Otros	Solucionados	45
DIRECTV PERU S.R.L	2016-02-01	PUNO	Televisión de paga	Otros	Solucionados	46
DIRECTV PERU S.R.L	2016-02-01	AMAZONAS	Televisión de paga	Problemas de calidad	Presentados	50
DIRECTV PERU S.R.L	2016-02-01	CUSCO	Televisión de paga	Otros	Solucionados	51
SEÑAL DIGITAL LATINA S.A.C	2016-02-01	LIMA Y CALLAO	Televisión de paga	Problemas de calidad	Presentados	51
VIP CHANNEL SAC	2016-02-01	LIMA Y CALLAO	Televisión de paga	Problemas de calidad	Presentados	53
AMÉRICA MÓVIL PERÚ S.A.C.	2016-02-01	APURÍMAC	Televisión de paga	Problemas de calidad	Presentados	55
AMÉRICA MÓVIL PERÚ S.A.C.	2016-02-01	LAMBAYEQUE	Televisión de paga	Otros	Solucionados	58
AMÉRICA MÓVIL PERÚ S.A.C.	2016-02-01	HUÁNUCO	Televisión de paga	Problemas de calidad	Presentados	59
AMÉRICA MÓVIL PERÚ S.A.C.	2016-02-01	LORETO	Televisión de paga	Problemas de calidad	Presentados	60
AMÉRICA MÓVIL PERÚ S.A.C.	2016-02-01	SAN MARTÍN	Televisión de paga	Problemas de calidad	Presentados	60
VIP CHANNEL SAC	2016-02-01	LIMA Y CALLAO	Televisión de paga	Otros	Presentados	60
AMÉRICA MÓVIL PERÚ S.A.C.	2016-02-01	AYACUCHO	Televisión de paga	Problemas de calidad	Presentados	61
AMÉRICA MÓVIL PERÚ S.A.C.	2016-02-01	AREQUIPA	Televisión de paga	Otros	Solucionados	61
DIRECTV PERU S.R.L	2016-02-01	ÁNCASH	Televisión de paga	Problemas de calidad	Presentados	63
KTV CABLE S.A.C.	2016-02-01	LIMA Y CALLAO	Televisión de paga	Otros	Solucionados	63
HUASCARAN TELECOM S.A.C.	2016-02-01	ÁNCASH	Televisión de paga	Problemas de calidad	Presentados	64
DIRECTV PERU S.R.L	2016-02-01	LA LIBERTAD	Televisión de paga	Otros	Solucionados	66
TELEFÓNICA DEL PERÚ S.A.A.	2016-02-01	APURÍMAC	Televisión de paga	Otros	Solucionados	66
TELEFÓNICA MULTIMEDIA S.A.C	2016-02-01	APURÍMAC	Televisión de paga	Otros	Solucionados	66
DIRECTV PERU S.R.L	2016-02-01	ICA	Televisión de paga	Otros	Solucionados	69
DIRECTV PERU S.R.L	2016-02-01	PIURA	Televisión de paga	Otros	Solucionados	69
HUASCARAN TELECOM S.A.C.	2016-02-01	ÁNCASH	Televisión de paga	Otros	Solucionados	69
AMÉRICA MÓVIL PERÚ S.A.C.	2016-02-01	UCAYALI	Televisión de paga	Problemas de calidad	Presentados	70
DIRECTV PERU S.R.L	2016-02-01	LORETO	Televisión de paga	Problemas de calidad	Presentados	70
AMÉRICA MÓVIL PERÚ S.A.C.	2016-02-01	AMAZONAS	Televisión de paga	Problemas de calidad	Presentados	71
DIRECTV PERU S.R.L	2016-02-01	LAMBAYEQUE	Televisión de paga	Otros	Solucionados	71
DIRECTV PERU S.R.L	2016-02-01	AYACUCHO	Televisión de paga	Problemas de calidad	Presentados	72
TELEFÓNICA DEL PERÚ S.A.A.	2016-02-01	APURÍMAC	Televisión de paga	Problemas de calidad	Presentados	72
TELEFÓNICA MULTIMEDIA S.A.C	2016-02-01	APURÍMAC	Televisión de paga	Problemas de calidad	Presentados	72
AMÉRICA MÓVIL PERÚ S.A.C.	2016-02-01	LA LIBERTAD	Televisión de paga	Otros	Solucionados	75
DIRECTV PERU S.R.L	2016-02-01	CAJAMARCA	Televisión de paga	Problemas de calidad	Presentados	76
AMÉRICA MÓVIL PERÚ S.A.C.	2016-02-01	MOQUEGUA	Televisión de paga	Problemas de calidad	Presentados	77
CABLE ORIENTE S.A	2016-02-01	UCAYALI	Televisión de paga	Servicio no operativo	Presentados	77
DIRECTV PERU S.R.L	2016-02-01	AREQUIPA	Televisión de paga	Otros	Solucionados	79
SEÑAL DIGITAL LATINA S.A.C	2016-02-01	LIMA Y CALLAO	Televisión de paga	Otros	Solucionados	80
DIRECTV PERU S.R.L	2016-02-01	PUNO	Televisión de paga	Problemas de calidad	Presentados	81
DIRECTV PERU S.R.L	2016-02-01	MADRE DE DIOS	Televisión de paga	Problemas de calidad	Presentados	85
TELEFÓNICA DEL PERÚ S.A.A.	2016-02-01	MADRE DE DIOS	Televisión de paga	Otros	Solucionados	86
TELEFÓNICA MULTIMEDIA S.A.C	2016-02-01	MADRE DE DIOS	Televisión de paga	Otros	Solucionados	86
DIRECTV PERU S.R.L	2016-02-01	JUNÍN	Televisión de paga	Problemas de calidad	Presentados	87
TELEFÓNICA DEL PERÚ S.A.A.	2016-02-01	MADRE DE DIOS	Televisión de paga	Problemas de calidad	Presentados	88
TELEFÓNICA MULTIMEDIA S.A.C	2016-02-01	MADRE DE DIOS	Televisión de paga	Problemas de calidad	Presentados	88
CABLE YURIMAGUAS S.R.LTDA.	2016-02-01	LORETO	Televisión de paga	Problemas de calidad	Presentados	96
CABLE YURIMAGUAS S.R.LTDA.	2016-02-01	LORETO	Televisión de paga	Otros	Solucionados	96
STAR GLOBAL COM S.A.C.	2016-02-01	TACNA	Televisión de paga	Problemas de calidad	Presentados	99
AMÉRICA MÓVIL PERÚ S.A.C.	2016-02-01	TUMBES	Televisión de paga	Problemas de calidad	Presentados	101
CABLE JAÉN S.R.L	2016-02-01	CAJAMARCA	Televisión de paga	Problemas de calidad	Presentados	102
AMÉRICA MÓVIL PERÚ S.A.C.	2016-02-01	PUNO	Televisión de paga	Problemas de calidad	Presentados	104
DIRECTV PERU S.R.L	2016-02-01	LAMBAYEQUE	Televisión de paga	Problemas de calidad	Presentados	104
CABLE JAÉN S.R.L	2016-02-01	CAJAMARCA	Televisión de paga	Otros	Solucionados	105
AMÉRICA MÓVIL PERÚ S.A.C.	2016-02-01	ICA	Televisión de paga	Otros	Solucionados	106
SUPERCABLE TELEVISIÓN S.R..L	2016-02-01	CAJAMARCA	Televisión de paga	Otros	Presentados	111
TELEFÓNICA DEL PERÚ S.A.A.	2016-02-01	ÁNCASH	Televisión de paga	Servicio no operativo	Presentados	112
TELEFÓNICA MULTIMEDIA S.A.C	2016-02-01	ÁNCASH	Televisión de paga	Servicio no operativo	Presentados	112
VIP CHANNEL SAC	2016-02-01	LIMA Y CALLAO	Televisión de paga	Otros	Solucionados	113
DIRECTV PERU S.R.L	2016-02-01	LA LIBERTAD	Televisión de paga	Problemas de calidad	Presentados	116
DIRECTV PERU S.R.L	2016-02-01	CUSCO	Televisión de paga	Problemas de calidad	Presentados	117
CABLE ORIENTE S.A	2016-02-01	UCAYALI	Televisión de paga	Otros	Solucionados	118
AMÉRICA MÓVIL PERÚ S.A.C.	2016-02-01	CUSCO	Televisión de paga	Problemas de calidad	Presentados	126
DIRECTV PERU S.R.L	2016-02-01	ICA	Televisión de paga	Problemas de calidad	Presentados	126
TELECABLE SAN HILARION E.I.R.L	2016-02-01	SAN MARTÍN	Televisión de paga	Problemas de calidad	Presentados	128
DIRECTV PERU S.R.L	2016-02-01	PIURA	Televisión de paga	Problemas de calidad	Presentados	131
DIRECTV PERU S.R.L	2016-02-01	AREQUIPA	Televisión de paga	Problemas de calidad	Presentados	145
AMÉRICA MÓVIL PERÚ S.A.C.	2016-02-01	JUNÍN	Televisión de paga	Problemas de calidad	Presentados	158
AMÉRICA MÓVIL PERÚ S.A.C.	2016-02-01	ÁNCASH	Televisión de paga	Problemas de calidad	Presentados	159
AMÉRICA MÓVIL PERÚ S.A.C.	2016-02-01	TACNA	Televisión de paga	Problemas de calidad	Presentados	167
AMÉRICA MÓVIL PERÚ S.A.C.	2016-02-01	CAJAMARCA	Televisión de paga	Problemas de calidad	Presentados	171
TELEFÓNICA DEL PERÚ S.A.A.	2016-02-01	JUNÍN	Televisión de paga	Servicio no operativo	Presentados	176
TELEFÓNICA MULTIMEDIA S.A.C	2016-02-01	JUNÍN	Televisión de paga	Servicio no operativo	Presentados	176
TELEFÓNICA DEL PERÚ S.A.A.	2016-02-01	TUMBES	Televisión de paga	Otros	Solucionados	186
TELEFÓNICA MULTIMEDIA S.A.C	2016-02-01	TUMBES	Televisión de paga	Otros	Solucionados	186
TELEFÓNICA DEL PERÚ S.A.A.	2016-02-01	SAN MARTÍN	Televisión de paga	Otros	Solucionados	188
TELEFÓNICA MULTIMEDIA S.A.C	2016-02-01	SAN MARTÍN	Televisión de paga	Otros	Solucionados	188
TELEFÓNICA DEL PERÚ S.A.A.	2016-02-01	TUMBES	Televisión de paga	Problemas de calidad	Presentados	191
TELEFÓNICA DEL PERÚ S.A.A.	2016-02-01	MOQUEGUA	Televisión de paga	Otros	Solucionados	191
TELEFÓNICA MULTIMEDIA S.A.C	2016-02-01	TUMBES	Televisión de paga	Problemas de calidad	Presentados	191
TELEFÓNICA MULTIMEDIA S.A.C	2016-02-01	MOQUEGUA	Televisión de paga	Otros	Solucionados	191
TELEFÓNICA DEL PERÚ S.A.A.	2016-02-01	SAN MARTÍN	Televisión de paga	Problemas de calidad	Presentados	193
TELEFÓNICA MULTIMEDIA S.A.C	2016-02-01	SAN MARTÍN	Televisión de paga	Problemas de calidad	Presentados	193
TELEFÓNICA DEL PERÚ S.A.A.	2016-02-01	MOQUEGUA	Televisión de paga	Problemas de calidad	Presentados	200
TELEFÓNICA MULTIMEDIA S.A.C	2016-02-01	MOQUEGUA	Televisión de paga	Problemas de calidad	Presentados	200
TELEFÓNICA DEL PERÚ S.A.A.	2016-02-01	TACNA	Televisión de paga	Otros	Solucionados	202
TELEFÓNICA MULTIMEDIA S.A.C	2016-02-01	TACNA	Televisión de paga	Otros	Solucionados	202
TELEFÓNICA DEL PERÚ S.A.A.	2016-02-01	TACNA	Televisión de paga	Problemas de calidad	Presentados	210
TELEFÓNICA MULTIMEDIA S.A.C	2016-02-01	TACNA	Televisión de paga	Problemas de calidad	Presentados	210
AMÉRICA MÓVIL PERÚ S.A.C.	2016-02-01	LAMBAYEQUE	Televisión de paga	Problemas de calidad	Presentados	215
TELEFÓNICA DEL PERÚ S.A.A.	2016-02-01	HUÁNUCO	Televisión de paga	Otros	Solucionados	222
TELEFÓNICA MULTIMEDIA S.A.C	2016-02-01	HUÁNUCO	Televisión de paga	Otros	Solucionados	222
TELEFÓNICA DEL PERÚ S.A.A.	2016-02-01	HUÁNUCO	Televisión de paga	Problemas de calidad	Presentados	227
TELEFÓNICA MULTIMEDIA S.A.C	2016-02-01	HUÁNUCO	Televisión de paga	Problemas de calidad	Presentados	227
COMUNICACIONES PORCÓN S.A.C.	2016-02-01	CAJAMARCA	Televisión de paga	Problemas de calidad	Presentados	243
TELEFÓNICA DEL PERÚ S.A.A.	2016-02-01	AYACUCHO	Televisión de paga	Otros	Solucionados	247
TELEFÓNICA MULTIMEDIA S.A.C	2016-02-01	AYACUCHO	Televisión de paga	Otros	Solucionados	247
COMUNICACIONES PORCÓN S.A.C.	2016-02-01	CAJAMARCA	Televisión de paga	Otros	Solucionados	257
TELEFÓNICA DEL PERÚ S.A.A.	2016-02-01	AYACUCHO	Televisión de paga	Problemas de calidad	Presentados	257
TELEFÓNICA MULTIMEDIA S.A.C	2016-02-01	AYACUCHO	Televisión de paga	Problemas de calidad	Presentados	257
AMÉRICA MÓVIL PERÚ S.A.C.	2016-02-01	PIURA	Televisión de paga	Otros	Solucionados	261
TELEFÓNICA DEL PERÚ S.A.A.	2016-02-01	PIURA	Televisión de paga	Servicio no operativo	Presentados	265
TELEFÓNICA MULTIMEDIA S.A.C	2016-02-01	PIURA	Televisión de paga	Servicio no operativo	Presentados	265
STAR GLOBAL COM S.A.C.	2016-02-01	AREQUIPA	Televisión de paga	Problemas de calidad	Presentados	273
AMÉRICA MÓVIL PERÚ S.A.C.	2016-02-01	AREQUIPA	Televisión de paga	Problemas de calidad	Presentados	296
AMÉRICA MÓVIL PERÚ S.A.C.	2016-02-01	ICA	Televisión de paga	Problemas de calidad	Presentados	309
TELEFÓNICA DEL PERÚ S.A.A.	2016-02-01	CAJAMARCA	Televisión de paga	Otros	Solucionados	358
TELEFÓNICA MULTIMEDIA S.A.C	2016-02-01	CAJAMARCA	Televisión de paga	Otros	Solucionados	358
AMÉRICA MÓVIL PERÚ S.A.C.	2016-02-01	LA LIBERTAD	Televisión de paga	Problemas de calidad	Presentados	381
TELEFÓNICA DEL PERÚ S.A.A.	2016-02-01	CAJAMARCA	Televisión de paga	Problemas de calidad	Presentados	381
TELEFÓNICA MULTIMEDIA S.A.C	2016-02-01	CAJAMARCA	Televisión de paga	Problemas de calidad	Presentados	381
TELEFÓNICA DEL PERÚ S.A.A.	2016-02-01	UCAYALI	Televisión de paga	Otros	Solucionados	409
TELEFÓNICA MULTIMEDIA S.A.C	2016-02-01	UCAYALI	Televisión de paga	Otros	Solucionados	409
TELEFÓNICA DEL PERÚ S.A.A.	2016-02-01	UCAYALI	Televisión de paga	Problemas de calidad	Presentados	420
TELEFÓNICA MULTIMEDIA S.A.C	2016-02-01	UCAYALI	Televisión de paga	Problemas de calidad	Presentados	420
TELEFÓNICA DEL PERÚ S.A.A.	2016-02-01	LORETO	Televisión de paga	Otros	Solucionados	447
TELEFÓNICA MULTIMEDIA S.A.C	2016-02-01	LORETO	Televisión de paga	Otros	Solucionados	447
TELEFÓNICA DEL PERÚ S.A.A.	2016-02-01	PUNO	Televisión de paga	Otros	Solucionados	458
TELEFÓNICA MULTIMEDIA S.A.C	2016-02-01	PUNO	Televisión de paga	Otros	Solucionados	458
TELEFÓNICA DEL PERÚ S.A.A.	2016-02-01	LORETO	Televisión de paga	Problemas de calidad	Presentados	464
TELEFÓNICA MULTIMEDIA S.A.C	2016-02-01	LORETO	Televisión de paga	Problemas de calidad	Presentados	464
TELEFÓNICA DEL PERÚ S.A.A.	2016-02-01	PUNO	Televisión de paga	Problemas de calidad	Presentados	466
TELEFÓNICA MULTIMEDIA S.A.C	2016-02-01	PUNO	Televisión de paga	Problemas de calidad	Presentados	466
TELEFÓNICA DEL PERÚ S.A.A.	2016-02-01	JUNÍN	Televisión de paga	Problemas de calidad	Presentados	527
TELEFÓNICA MULTIMEDIA S.A.C	2016-02-01	JUNÍN	Televisión de paga	Problemas de calidad	Presentados	527
TELEFÓNICA DEL PERÚ S.A.A.	2016-02-01	LA LIBERTAD	Televisión de paga	Servicio no operativo	Presentados	572
TELEFÓNICA MULTIMEDIA S.A.C	2016-02-01	LA LIBERTAD	Televisión de paga	Servicio no operativo	Presentados	572
TELEFÓNICA DEL PERÚ S.A.A.	2016-02-01	JUNÍN	Televisión de paga	Otros	Solucionados	591
TELEFÓNICA MULTIMEDIA S.A.C	2016-02-01	JUNÍN	Televisión de paga	Otros	Solucionados	591
TELEFÓNICA DEL PERÚ S.A.A.	2016-02-01	LAMBAYEQUE	Televisión de paga	Servicio no operativo	Presentados	637
TELEFÓNICA MULTIMEDIA S.A.C	2016-02-01	LAMBAYEQUE	Televisión de paga	Servicio no operativo	Presentados	637
TELEFÓNICA DEL PERÚ S.A.A.	2016-02-01	CUSCO	Televisión de paga	Servicio no operativo	Presentados	713
TELEFÓNICA MULTIMEDIA S.A.C	2016-02-01	CUSCO	Televisión de paga	Servicio no operativo	Presentados	713
AMÉRICA MÓVIL PERÚ S.A.C.	2016-02-01	PIURA	Televisión de paga	Problemas de calidad	Presentados	733
TELEFÓNICA DEL PERÚ S.A.A.	2016-02-01	CUSCO	Televisión de paga	Problemas de calidad	Presentados	790
TELEFÓNICA MULTIMEDIA S.A.C	2016-02-01	CUSCO	Televisión de paga	Problemas de calidad	Presentados	790
DIRECTV PERU S.R.L	2016-02-01	LIMA Y CALLAO	Televisión de paga	Otros	Solucionados	819
SUPERCABLE TELEVISIÓN S.R..L	2016-02-01	CAJAMARCA	Televisión de paga	Problemas de calidad	Presentados	892
TELEFÓNICA DEL PERÚ S.A.A.	2016-02-01	AREQUIPA	Televisión de paga	Servicio no operativo	Presentados	979
TELEFÓNICA MULTIMEDIA S.A.C	2016-02-01	AREQUIPA	Televisión de paga	Servicio no operativo	Presentados	979
TELEFÓNICA DEL PERÚ S.A.A.	2016-02-01	ÁNCASH	Televisión de paga	Problemas de calidad	Presentados	981
TELEFÓNICA MULTIMEDIA S.A.C	2016-02-01	ÁNCASH	Televisión de paga	Problemas de calidad	Presentados	981
SUPERCABLE TELEVISIÓN S.R..L	2016-02-01	CAJAMARCA	Televisión de paga	Otros	Solucionados	1003
TELEFÓNICA DEL PERÚ S.A.A.	2016-02-01	ÁNCASH	Televisión de paga	Otros	Solucionados	1031
TELEFÓNICA MULTIMEDIA S.A.C	2016-02-01	ÁNCASH	Televisión de paga	Otros	Solucionados	1031
TELEFÓNICA DEL PERÚ S.A.A.	2016-02-01	ICA	Televisión de paga	Otros	Solucionados	1082
TELEFÓNICA MULTIMEDIA S.A.C	2016-02-01	ICA	Televisión de paga	Otros	Solucionados	1082
AMÉRICA MÓVIL PERÚ S.A.C.	2016-02-01	LIMA Y CALLAO	Televisión de paga	Otros	Solucionados	1083
TELEFÓNICA DEL PERÚ S.A.A.	2016-02-01	ICA	Televisión de paga	Problemas de calidad	Presentados	1094
TELEFÓNICA MULTIMEDIA S.A.C	2016-02-01	ICA	Televisión de paga	Problemas de calidad	Presentados	1094
TELEFÓNICA DEL PERÚ S.A.A.	2016-02-01	PIURA	Televisión de paga	Problemas de calidad	Presentados	1379
TELEFÓNICA MULTIMEDIA S.A.C	2016-02-01	PIURA	Televisión de paga	Problemas de calidad	Presentados	1379
TELEFÓNICA DEL PERÚ S.A.A.	2016-02-01	CUSCO	Televisión de paga	Otros	Solucionados	1408
TELEFÓNICA MULTIMEDIA S.A.C	2016-02-01	CUSCO	Televisión de paga	Otros	Solucionados	1408
TELEFÓNICA DEL PERÚ S.A.A.	2016-02-01	AREQUIPA	Televisión de paga	Problemas de calidad	Presentados	1486
TELEFÓNICA MULTIMEDIA S.A.C	2016-02-01	AREQUIPA	Televisión de paga	Problemas de calidad	Presentados	1486
TELEFÓNICA DEL PERÚ S.A.A.	2016-02-01	PIURA	Televisión de paga	Otros	Solucionados	1500
TELEFÓNICA MULTIMEDIA S.A.C	2016-02-01	PIURA	Televisión de paga	Otros	Solucionados	1500
DIRECTV PERU S.R.L	2016-02-01	LIMA Y CALLAO	Televisión de paga	Problemas de calidad	Presentados	1519
TELEFÓNICA DEL PERÚ S.A.A.	2016-02-01	LA LIBERTAD	Televisión de paga	Problemas de calidad	Presentados	1647
TELEFÓNICA MULTIMEDIA S.A.C	2016-02-01	LA LIBERTAD	Televisión de paga	Problemas de calidad	Presentados	1647
TELEFÓNICA DEL PERÚ S.A.A.	2016-02-01	LAMBAYEQUE	Televisión de paga	Problemas de calidad	Presentados	1671
TELEFÓNICA MULTIMEDIA S.A.C	2016-02-01	LAMBAYEQUE	Televisión de paga	Problemas de calidad	Presentados	1671
TELEFÓNICA DEL PERÚ S.A.A.	2016-02-01	LAMBAYEQUE	Televisión de paga	Otros	Solucionados	2089
TELEFÓNICA MULTIMEDIA S.A.C	2016-02-01	LAMBAYEQUE	Televisión de paga	Otros	Solucionados	2089
TELEFÓNICA DEL PERÚ S.A.A.	2016-02-01	LA LIBERTAD	Televisión de paga	Otros	Solucionados	2109
TELEFÓNICA MULTIMEDIA S.A.C	2016-02-01	LA LIBERTAD	Televisión de paga	Otros	Solucionados	2109
TELEFÓNICA DEL PERÚ S.A.A.	2016-02-01	AREQUIPA	Televisión de paga	Otros	Solucionados	2369
TELEFÓNICA MULTIMEDIA S.A.C	2016-02-01	AREQUIPA	Televisión de paga	Otros	Solucionados	2369
AMÉRICA MÓVIL PERÚ S.A.C.	2016-02-01	LIMA Y CALLAO	Televisión de paga	Problemas de calidad	Presentados	4464
TELEFÓNICA DEL PERÚ S.A.A.	2016-02-01	LIMA Y CALLAO	Televisión de paga	Servicio no operativo	Presentados	22964
TELEFÓNICA MULTIMEDIA S.A.C	2016-02-01	LIMA Y CALLAO	Televisión de paga	Servicio no operativo	Presentados	22964
TELEFÓNICA DEL PERÚ S.A.A.	2016-02-01	LIMA Y CALLAO	Televisión de paga	Problemas de calidad	Presentados	35453
TELEFÓNICA MULTIMEDIA S.A.C	2016-02-01	LIMA Y CALLAO	Televisión de paga	Problemas de calidad	Presentados	35453
TELEFÓNICA DEL PERÚ S.A.A.	2016-02-01	LIMA Y CALLAO	Televisión de paga	Otros	Solucionados	56351
TELEFÓNICA MULTIMEDIA S.A.C	2016-02-01	LIMA Y CALLAO	Televisión de paga	Otros	Solucionados	56351
AMÉRICA MÓVIL PERÚ S.A.C.	2016-03-01	ÁNCASH	Arrendamiento de circuitos	Problemas de calidad	Presentados	1
AMÉRICA MÓVIL PERÚ S.A.C.	2016-03-01	ICA	Arrendamiento de circuitos	Problemas de calidad	Presentados	1
AMÉRICA MÓVIL PERÚ S.A.C.	2016-03-01	JUNÍN	Arrendamiento de circuitos	Problemas de calidad	Presentados	1
AMÉRICA MÓVIL PERÚ S.A.C.	2016-03-01	ÁNCASH	Arrendamiento de circuitos	Otros	Solucionados	1
AMÉRICA MÓVIL PERÚ S.A.C.	2016-03-01	TACNA	Arrendamiento de circuitos	Otros	Solucionados	1
AMERICATEL PERÚ S.A.	2016-03-01	AREQUIPA	Arrendamiento de circuitos	Problemas de calidad	Presentados	1
AMERICATEL PERÚ S.A.	2016-03-01	AYACUCHO	Arrendamiento de circuitos	Problemas de calidad	Presentados	1
AMERICATEL PERÚ S.A.	2016-03-01	ICA	Arrendamiento de circuitos	Problemas de calidad	Presentados	1
AMERICATEL PERÚ S.A.	2016-03-01	LA LIBERTAD	Arrendamiento de circuitos	Problemas de calidad	Presentados	1
AMERICATEL PERÚ S.A.	2016-03-01	MOQUEGUA	Arrendamiento de circuitos	Problemas de calidad	Presentados	1
AMERICATEL PERÚ S.A.	2016-03-01	PASCO	Arrendamiento de circuitos	Problemas de calidad	Presentados	1
AMERICATEL PERÚ S.A.	2016-03-01	CAJAMARCA	Arrendamiento de circuitos	Servicio no operativo	Presentados	1
AMERICATEL PERÚ S.A.	2016-03-01	HUÁNUCO	Arrendamiento de circuitos	Servicio no operativo	Presentados	1
AMERICATEL PERÚ S.A.	2016-03-01	ICA	Arrendamiento de circuitos	Servicio no operativo	Presentados	1
AMERICATEL PERÚ S.A.	2016-03-01	LA LIBERTAD	Arrendamiento de circuitos	Servicio no operativo	Presentados	1
AMERICATEL PERÚ S.A.	2016-03-01	PASCO	Arrendamiento de circuitos	Servicio no operativo	Presentados	1
AMERICATEL PERÚ S.A.	2016-03-01	PIURA	Arrendamiento de circuitos	Servicio no operativo	Presentados	1
AMERICATEL PERÚ S.A.	2016-03-01	PUNO	Arrendamiento de circuitos	Servicio no operativo	Presentados	1
AMERICATEL PERÚ S.A.	2016-03-01	APURÍMAC	Arrendamiento de circuitos	Otros	Solucionados	1
AMERICATEL PERÚ S.A.	2016-03-01	AYACUCHO	Arrendamiento de circuitos	Otros	Solucionados	1
AMERICATEL PERÚ S.A.	2016-03-01	CAJAMARCA	Arrendamiento de circuitos	Otros	Solucionados	1
AMERICATEL PERÚ S.A.	2016-03-01	CUSCO	Arrendamiento de circuitos	Otros	Solucionados	1
AMERICATEL PERÚ S.A.	2016-03-01	MADRE DE DIOS	Arrendamiento de circuitos	Otros	Solucionados	1
AMERICATEL PERÚ S.A.	2016-03-01	PIURA	Arrendamiento de circuitos	Otros	Solucionados	1
AMERICATEL PERÚ S.A.	2016-03-01	PUNO	Arrendamiento de circuitos	Otros	Solucionados	1
GILAT TO HOME PERÚ S.A.	2016-03-01	AMAZONAS	Arrendamiento de circuitos	Servicio no operativo	Presentados	1
GILAT TO HOME PERÚ S.A.	2016-03-01	LORETO	Arrendamiento de circuitos	Servicio no operativo	Presentados	1
GILAT TO HOME PERÚ S.A.	2016-03-01	AMAZONAS	Arrendamiento de circuitos	Otros	Solucionados	1
GILAT TO HOME PERÚ S.A.	2016-03-01	LORETO	Arrendamiento de circuitos	Otros	Solucionados	1
SENCINET LATAM PERU S.A.C.	2016-03-01	ICA	Arrendamiento de circuitos	Problemas de calidad	Presentados	1
SENCINET LATAM PERU S.A.C.	2016-03-01	JUNÍN	Arrendamiento de circuitos	Problemas de calidad	Presentados	1
SENCINET LATAM PERU S.A.C.	2016-03-01	LAMBAYEQUE	Arrendamiento de circuitos	Problemas de calidad	Presentados	1
SENCINET LATAM PERU S.A.C.	2016-03-01	PUNO	Arrendamiento de circuitos	Problemas de calidad	Presentados	1
SENCINET LATAM PERU S.A.C.	2016-03-01	LORETO	Arrendamiento de circuitos	Servicio no operativo	Presentados	1
SENCINET LATAM PERU S.A.C.	2016-03-01	PIURA	Arrendamiento de circuitos	Servicio no operativo	Presentados	1
AMÉRICA MÓVIL PERÚ S.A.C.	2016-03-01	AREQUIPA	Arrendamiento de circuitos	Problemas de calidad	Presentados	2
AMÉRICA MÓVIL PERÚ S.A.C.	2016-03-01	TACNA	Arrendamiento de circuitos	Problemas de calidad	Presentados	2
AMÉRICA MÓVIL PERÚ S.A.C.	2016-03-01	AREQUIPA	Arrendamiento de circuitos	Otros	Solucionados	2
AMÉRICA MÓVIL PERÚ S.A.C.	2016-03-01	CUSCO	Arrendamiento de circuitos	Otros	Solucionados	2
AMÉRICA MÓVIL PERÚ S.A.C.	2016-03-01	HUÁNUCO	Arrendamiento de circuitos	Otros	Solucionados	2
AMÉRICA MÓVIL PERÚ S.A.C.	2016-03-01	UCAYALI	Arrendamiento de circuitos	Otros	Solucionados	2
AMERICATEL PERÚ S.A.	2016-03-01	APURÍMAC	Arrendamiento de circuitos	Problemas de calidad	Presentados	2
AMERICATEL PERÚ S.A.	2016-03-01	LAMBAYEQUE	Arrendamiento de circuitos	Problemas de calidad	Presentados	2
AMERICATEL PERÚ S.A.	2016-03-01	LORETO	Arrendamiento de circuitos	Servicio no operativo	Presentados	2
AMERICATEL PERÚ S.A.	2016-03-01	TACNA	Arrendamiento de circuitos	Servicio no operativo	Presentados	2
AMERICATEL PERÚ S.A.	2016-03-01	JUNÍN	Arrendamiento de circuitos	Otros	Solucionados	2
AMERICATEL PERÚ S.A.	2016-03-01	LA LIBERTAD	Arrendamiento de circuitos	Otros	Solucionados	2
SENCINET LATAM PERU S.A.C.	2016-03-01	SAN MARTÍN	Arrendamiento de circuitos	Servicio no operativo	Presentados	2
AMÉRICA MÓVIL PERÚ S.A.C.	2016-03-01	CAJAMARCA	Arrendamiento de circuitos	Problemas de calidad	Presentados	3
AMÉRICA MÓVIL PERÚ S.A.C.	2016-03-01	LAMBAYEQUE	Arrendamiento de circuitos	Problemas de calidad	Presentados	3
AMÉRICA MÓVIL PERÚ S.A.C.	2016-03-01	CAJAMARCA	Arrendamiento de circuitos	Otros	Solucionados	3
AMERICATEL PERÚ S.A.	2016-03-01	LAMBAYEQUE	Arrendamiento de circuitos	Otros	Solucionados	3
AMÉRICA MÓVIL PERÚ S.A.C.	2016-03-01	CUSCO	Arrendamiento de circuitos	Problemas de calidad	Presentados	4
AMÉRICA MÓVIL PERÚ S.A.C.	2016-03-01	UCAYALI	Arrendamiento de circuitos	Problemas de calidad	Presentados	4
AMÉRICA MÓVIL PERÚ S.A.C.	2016-03-01	LA LIBERTAD	Arrendamiento de circuitos	Otros	Solucionados	4
AMÉRICA MÓVIL PERÚ S.A.C.	2016-03-01	PIURA	Arrendamiento de circuitos	Otros	Solucionados	4
AMERICATEL PERÚ S.A.	2016-03-01	JUNÍN	Arrendamiento de circuitos	Servicio no operativo	Presentados	4
AMERICATEL PERÚ S.A.	2016-03-01	LAMBAYEQUE	Arrendamiento de circuitos	Servicio no operativo	Presentados	5
SENCINET LATAM PERU S.A.C.	2016-03-01	LIMA Y CALLAO	Arrendamiento de circuitos	Servicio no operativo	Presentados	5
AMÉRICA MÓVIL PERÚ S.A.C.	2016-03-01	PIURA	Arrendamiento de circuitos	Problemas de calidad	Presentados	6
AMÉRICA MÓVIL PERÚ S.A.C.	2016-03-01	HUÁNUCO	Arrendamiento de circuitos	Problemas de calidad	Presentados	9
AMÉRICA MÓVIL PERÚ S.A.C.	2016-03-01	LA LIBERTAD	Arrendamiento de circuitos	Problemas de calidad	Presentados	10
AMERICATEL PERÚ S.A.	2016-03-01	AREQUIPA	Arrendamiento de circuitos	Servicio no operativo	Presentados	11
AMERICATEL PERÚ S.A.	2016-03-01	AREQUIPA	Arrendamiento de circuitos	Otros	Solucionados	11
SENCINET LATAM PERU S.A.C.	2016-03-01	LIMA Y CALLAO	Arrendamiento de circuitos	Problemas de calidad	Presentados	12
AMERICATEL PERÚ S.A.	2016-03-01	LIMA Y CALLAO	Arrendamiento de circuitos	Problemas de calidad	Presentados	27
AMÉRICA MÓVIL PERÚ S.A.C.	2016-03-01	LIMA Y CALLAO	Arrendamiento de circuitos	Otros	Solucionados	39
AMERICATEL PERÚ S.A.	2016-03-01	LIMA Y CALLAO	Arrendamiento de circuitos	Otros	Solucionados	43
AMERICATEL PERÚ S.A.	2016-03-01	LIMA Y CALLAO	Arrendamiento de circuitos	Servicio no operativo	Presentados	55
AMÉRICA MÓVIL PERÚ S.A.C.	2016-03-01	LIMA Y CALLAO	Arrendamiento de circuitos	Problemas de calidad	Presentados	111
AMÉRICA MÓVIL PERÚ S.A.C.	2016-03-01	AMAZONAS	Internet fijo	Problemas de calidad	Presentados	1
AMÉRICA MÓVIL PERÚ S.A.C.	2016-03-01	APURÍMAC	Internet fijo	Problemas de calidad	Presentados	1
AMÉRICA MÓVIL PERÚ S.A.C.	2016-03-01	HUANCAVELICA	Internet fijo	Problemas de calidad	Presentados	1
AMÉRICA MÓVIL PERÚ S.A.C.	2016-03-01	AMAZONAS	Internet fijo	Otros	Solucionados	1
AMÉRICA MÓVIL PERÚ S.A.C.	2016-03-01	APURÍMAC	Internet fijo	Otros	Solucionados	1
AMÉRICA MÓVIL PERÚ S.A.C.	2016-03-01	HUANCAVELICA	Internet fijo	Otros	Solucionados	1
AMERICATEL PERÚ S.A.	2016-03-01	AREQUIPA	Internet fijo	Problemas de calidad	Presentados	1
AMERICATEL PERÚ S.A.	2016-03-01	LA LIBERTAD	Internet fijo	Problemas de calidad	Presentados	1
AMERICATEL PERÚ S.A.	2016-03-01	PIURA	Internet fijo	Problemas de calidad	Presentados	1
AMERICATEL PERÚ S.A.	2016-03-01	PUNO	Internet fijo	Problemas de calidad	Presentados	1
AMERICATEL PERÚ S.A.	2016-03-01	AYACUCHO	Internet fijo	Servicio no operativo	Presentados	1
AMERICATEL PERÚ S.A.	2016-03-01	ICA	Internet fijo	Servicio no operativo	Presentados	1
AMERICATEL PERÚ S.A.	2016-03-01	TUMBES	Internet fijo	Servicio no operativo	Presentados	1
AMERICATEL PERÚ S.A.	2016-03-01	UCAYALI	Internet fijo	Servicio no operativo	Presentados	1
AMERICATEL PERÚ S.A.	2016-03-01	ÁNCASH	Internet fijo	Otros	Solucionados	1
AMERICATEL PERÚ S.A.	2016-03-01	JUNÍN	Internet fijo	Otros	Solucionados	1
AMERICATEL PERÚ S.A.	2016-03-01	TUMBES	Internet fijo	Otros	Solucionados	1
AMERICATEL PERÚ S.A.	2016-03-01	UCAYALI	Internet fijo	Otros	Solucionados	1
COMPAÑÍA DE COMERCIO GLOBAL S.A.C.	2016-03-01	LORETO	Internet fijo	Problemas de calidad	Presentados	1
COMPAÑÍA DE COMERCIO GLOBAL S.A.C.	2016-03-01	LORETO	Internet fijo	Otros	Solucionados	1
GILAT TO HOME PERÚ S.A.	2016-03-01	HUANCAVELICA	Internet fijo	Problemas de calidad	Presentados	1
GILAT TO HOME PERÚ S.A.	2016-03-01	ÁNCASH	Internet fijo	Servicio no operativo	Presentados	1
GILAT TO HOME PERÚ S.A.	2016-03-01	AYACUCHO	Internet fijo	Servicio no operativo	Presentados	1
GILAT TO HOME PERÚ S.A.	2016-03-01	CUSCO	Internet fijo	Servicio no operativo	Presentados	1
GILAT TO HOME PERÚ S.A.	2016-03-01	JUNÍN	Internet fijo	Servicio no operativo	Presentados	1
GILAT TO HOME PERÚ S.A.	2016-03-01	LA LIBERTAD	Internet fijo	Servicio no operativo	Presentados	1
GILAT TO HOME PERÚ S.A.	2016-03-01	LIMA Y CALLAO	Internet fijo	Servicio no operativo	Presentados	1
GILAT TO HOME PERÚ S.A.	2016-03-01	MOQUEGUA	Internet fijo	Servicio no operativo	Presentados	1
GILAT TO HOME PERÚ S.A.	2016-03-01	PUNO	Internet fijo	Servicio no operativo	Presentados	1
GILAT TO HOME PERÚ S.A.	2016-03-01	ÁNCASH	Internet fijo	Otros	Solucionados	1
GILAT TO HOME PERÚ S.A.	2016-03-01	AYACUCHO	Internet fijo	Otros	Solucionados	1
GILAT TO HOME PERÚ S.A.	2016-03-01	CUSCO	Internet fijo	Otros	Solucionados	1
GILAT TO HOME PERÚ S.A.	2016-03-01	HUANCAVELICA	Internet fijo	Otros	Solucionados	1
GILAT TO HOME PERÚ S.A.	2016-03-01	JUNÍN	Internet fijo	Otros	Solucionados	1
GILAT TO HOME PERÚ S.A.	2016-03-01	LA LIBERTAD	Internet fijo	Otros	Solucionados	1
GILAT TO HOME PERÚ S.A.	2016-03-01	LIMA Y CALLAO	Internet fijo	Otros	Solucionados	1
GILAT TO HOME PERÚ S.A.	2016-03-01	MOQUEGUA	Internet fijo	Otros	Solucionados	1
GILAT TO HOME PERÚ S.A.	2016-03-01	PUNO	Internet fijo	Otros	Solucionados	1
OLO DEL PERÚ S.A.C.	2016-03-01	AREQUIPA	Internet fijo	Problemas de calidad	Presentados	1
OLO DEL PERÚ S.A.C.	2016-03-01	PIURA	Internet fijo	Problemas de calidad	Presentados	1
OLO DEL PERÚ S.A.C.	2016-03-01	AREQUIPA	Internet fijo	Otros	Presentados	1
OLO DEL PERÚ S.A.C.	2016-03-01	PIURA	Internet fijo	Otros	Solucionados	1
SENCINET LATAM PERU S.A.C.	2016-03-01	LIMA Y CALLAO	Internet fijo	Servicio no operativo	Presentados	1
AMÉRICA MÓVIL PERÚ S.A.C.	2016-03-01	LORETO	Internet fijo	Problemas de calidad	Presentados	2
AMÉRICA MÓVIL PERÚ S.A.C.	2016-03-01	AYACUCHO	Internet fijo	Otros	Solucionados	2
AMÉRICA MÓVIL PERÚ S.A.C.	2016-03-01	LORETO	Internet fijo	Otros	Solucionados	2
AMERICATEL PERÚ S.A.	2016-03-01	ÁNCASH	Internet fijo	Servicio no operativo	Presentados	2
GILAT TO HOME PERÚ S.A.	2016-03-01	AREQUIPA	Internet fijo	Servicio no operativo	Presentados	2
GILAT TO HOME PERÚ S.A.	2016-03-01	LORETO	Internet fijo	Servicio no operativo	Presentados	2
GILAT TO HOME PERÚ S.A.	2016-03-01	AREQUIPA	Internet fijo	Otros	Solucionados	2
OLO DEL PERÚ S.A.C.	2016-03-01	ICA	Internet fijo	Problemas de calidad	Presentados	2
OLO DEL PERÚ S.A.C.	2016-03-01	LA LIBERTAD	Internet fijo	Problemas de calidad	Presentados	2
OLO DEL PERÚ S.A.C.	2016-03-01	AREQUIPA	Internet fijo	Otros	Solucionados	2
OLO DEL PERÚ S.A.C.	2016-03-01	ICA	Internet fijo	Otros	Solucionados	2
OLO DEL PERÚ S.A.C.	2016-03-01	LA LIBERTAD	Internet fijo	Otros	Solucionados	2
TVS WIRELESS S.A.C.	2016-03-01	LIMA Y CALLAO	Internet fijo	Problemas de calidad	Presentados	2
AMERICATEL PERÚ S.A.	2016-03-01	JUNÍN	Internet fijo	Servicio no operativo	Presentados	3
AMERICATEL PERÚ S.A.	2016-03-01	LA LIBERTAD	Internet fijo	Otros	Solucionados	3
CABLEVISION S.A.C.	2016-03-01	LIMA Y CALLAO	Internet fijo	Problemas de calidad	Presentados	3
CABLEVISION S.A.C.	2016-03-01	LIMA Y CALLAO	Internet fijo	Otros	Solucionados	3
GILAT TO HOME PERÚ S.A.	2016-03-01	LORETO	Internet fijo	Problemas de calidad	Presentados	3
GILAT TO HOME PERÚ S.A.	2016-03-01	MADRE DE DIOS	Internet fijo	Servicio no operativo	Presentados	3
GILAT TO HOME PERÚ S.A.	2016-03-01	MADRE DE DIOS	Internet fijo	Otros	Solucionados	3
TVS WIRELESS S.A.C.	2016-03-01	LIMA Y CALLAO	Internet fijo	Otros	Presentados	3
WI-NET PERU S.A.C.	2016-03-01	LIMA Y CALLAO	Internet fijo	Servicio no operativo	Presentados	3
AMÉRICA MÓVIL PERÚ S.A.C.	2016-03-01	AYACUCHO	Internet fijo	Problemas de calidad	Presentados	4
AMERICATEL PERÚ S.A.	2016-03-01	LA LIBERTAD	Internet fijo	Servicio no operativo	Presentados	4
GILAT TO HOME PERÚ S.A.	2016-03-01	LORETO	Internet fijo	Otros	Solucionados	5
TVS WIRELESS S.A.C.	2016-03-01	LIMA Y CALLAO	Internet fijo	Otros	Solucionados	5
AMÉRICA MÓVIL PERÚ S.A.C.	2016-03-01	MOQUEGUA	Internet fijo	Otros	Solucionados	7
AMERICATEL PERÚ S.A.	2016-03-01	LAMBAYEQUE	Internet fijo	Problemas de calidad	Presentados	8
TELEFÓNICA DEL PERÚ S.A.A.	2016-03-01	AMAZONAS	Internet fijo	Otros	Presentados	9
AGUSTINA SERVICIOS GENERALES S.A.C.	2016-03-01	LA LIBERTAD	Internet fijo	Servicio no operativo	Presentados	10
AMERICATEL PERÚ S.A.	2016-03-01	AREQUIPA	Internet fijo	Otros	Solucionados	10
AMÉRICA MÓVIL PERÚ S.A.C.	2016-03-01	SAN MARTÍN	Internet fijo	Otros	Solucionados	11
AMERICATEL PERÚ S.A.	2016-03-01	LAMBAYEQUE	Internet fijo	Otros	Solucionados	11
AGUSTINA SERVICIOS GENERALES S.A.C.	2016-03-01	LA LIBERTAD	Internet fijo	Problemas de calidad	Presentados	12
AMÉRICA MÓVIL PERÚ S.A.C.	2016-03-01	MOQUEGUA	Internet fijo	Problemas de calidad	Presentados	12
AMERICATEL PERÚ S.A.	2016-03-01	AREQUIPA	Internet fijo	Servicio no operativo	Presentados	12
AMERICATEL PERÚ S.A.	2016-03-01	LAMBAYEQUE	Internet fijo	Servicio no operativo	Presentados	12
TELEFÓNICA DEL PERÚ S.A.A.	2016-03-01	AMAZONAS	Internet fijo	Problemas de calidad	Presentados	12
AMÉRICA MÓVIL PERÚ S.A.C.	2016-03-01	SAN MARTÍN	Internet fijo	Problemas de calidad	Presentados	13
RED INTERCABLE PERU S.A.C.	2016-03-01	JUNÍN	Internet fijo	Problemas de calidad	Presentados	13
RED INTERCABLE PERU S.A.C.	2016-03-01	JUNÍN	Internet fijo	Otros	Solucionados	13
MOCHE INVERSIONES S.A.	2016-03-01	LIMA Y CALLAO	Internet fijo	Otros	Presentados	14
CONVERGIA PERÚ S.A.	2016-03-01	LIMA Y CALLAO	Internet fijo	Problemas de calidad	Presentados	19
MOCHE INVERSIONES S.A.	2016-03-01	LIMA Y CALLAO	Internet fijo	Servicio no operativo	Presentados	27
AMÉRICA MÓVIL PERÚ S.A.C.	2016-03-01	PUNO	Internet fijo	Otros	Solucionados	29
AMÉRICA MÓVIL PERÚ S.A.C.	2016-03-01	CUSCO	Internet fijo	Otros	Solucionados	33
AMÉRICA MÓVIL PERÚ S.A.C.	2016-03-01	JUNÍN	Internet fijo	Otros	Solucionados	35
AMÉRICA MÓVIL PERÚ S.A.C.	2016-03-01	PUNO	Internet fijo	Problemas de calidad	Presentados	37
AMÉRICA MÓVIL PERÚ S.A.C.	2016-03-01	TUMBES	Internet fijo	Otros	Solucionados	38
MOCHE INVERSIONES S.A.	2016-03-01	LIMA Y CALLAO	Internet fijo	Otros	Solucionados	41
TELEFÓNICA DEL PERÚ S.A.A.	2016-03-01	HUANCAVELICA	Internet fijo	Otros	Presentados	41
TELEFÓNICA DEL PERÚ S.A.A.	2016-03-01	AMAZONAS	Internet fijo	Servicio no operativo	Presentados	42
TELEFÓNICA DEL PERÚ S.A.A.	2016-03-01	PASCO	Internet fijo	Otros	Presentados	42
AMÉRICA MÓVIL PERÚ S.A.C.	2016-03-01	UCAYALI	Internet fijo	Otros	Solucionados	49
AMÉRICA MÓVIL PERÚ S.A.C.	2016-03-01	MADRE DE DIOS	Internet fijo	Otros	Solucionados	53
STAR GLOBAL COM S.A.C.	2016-03-01	TACNA	Internet fijo	Problemas de calidad	Presentados	54
AMÉRICA MÓVIL PERÚ S.A.C.	2016-03-01	TACNA	Internet fijo	Otros	Solucionados	56
TELEFÓNICA DEL PERÚ S.A.A.	2016-03-01	APURÍMAC	Internet fijo	Otros	Presentados	57
AMÉRICA MÓVIL PERÚ S.A.C.	2016-03-01	TUMBES	Internet fijo	Problemas de calidad	Presentados	58
WINNER SYSTEMS S.A.C.	2016-03-01	PIURA	Internet fijo	Problemas de calidad	Presentados	61
WINNER SYSTEMS S.A.C.	2016-03-01	PIURA	Internet fijo	Otros	Solucionados	61
TELEFÓNICA DEL PERÚ S.A.A.	2016-03-01	AMAZONAS	Internet fijo	Otros	Solucionados	63
AMÉRICA MÓVIL PERÚ S.A.C.	2016-03-01	ÁNCASH	Internet fijo	Otros	Solucionados	64
AMÉRICA MÓVIL PERÚ S.A.C.	2016-03-01	HUÁNUCO	Internet fijo	Otros	Solucionados	64
TELEFÓNICA DEL PERÚ S.A.A.	2016-03-01	HUANCAVELICA	Internet fijo	Problemas de calidad	Presentados	64
AMÉRICA MÓVIL PERÚ S.A.C.	2016-03-01	CAJAMARCA	Internet fijo	Otros	Solucionados	66
OLO DEL PERÚ S.A.C.	2016-03-01	LIMA Y CALLAO	Internet fijo	Otros	Presentados	67
AMÉRICA MÓVIL PERÚ S.A.C.	2016-03-01	JUNÍN	Internet fijo	Problemas de calidad	Presentados	72
OLO DEL PERÚ S.A.C.	2016-03-01	LIMA Y CALLAO	Internet fijo	Servicio no operativo	Presentados	72
TELEFÓNICA DEL PERÚ S.A.A.	2016-03-01	MADRE DE DIOS	Internet fijo	Otros	Presentados	75
AMÉRICA MÓVIL PERÚ S.A.C.	2016-03-01	ICA	Internet fijo	Otros	Solucionados	78
AMÉRICA MÓVIL PERÚ S.A.C.	2016-03-01	MADRE DE DIOS	Internet fijo	Problemas de calidad	Presentados	87
AMÉRICA MÓVIL PERÚ S.A.C.	2016-03-01	CUSCO	Internet fijo	Problemas de calidad	Presentados	93
TELEFÓNICA DEL PERÚ S.A.A.	2016-03-01	TUMBES	Internet fijo	Problemas de calidad	Presentados	93
AMÉRICA MÓVIL PERÚ S.A.C.	2016-03-01	TACNA	Internet fijo	Problemas de calidad	Presentados	100
TELEFÓNICA DEL PERÚ S.A.A.	2016-03-01	MADRE DE DIOS	Internet fijo	Problemas de calidad	Presentados	100
AMÉRICA MÓVIL PERÚ S.A.C.	2016-03-01	UCAYALI	Internet fijo	Problemas de calidad	Presentados	101
TELEFÓNICA DEL PERÚ S.A.A.	2016-03-01	MOQUEGUA	Internet fijo	Otros	Presentados	101
TELEFÓNICA DEL PERÚ S.A.A.	2016-03-01	PASCO	Internet fijo	Problemas de calidad	Presentados	103
[truncated: 85,000 more rows]

## Sheet: Diccionario
	ATRIBUTO	DESCRIPCIÓN	TIPO DE DATO
	Empresa operadora	Nombre (razón social) de la empresa operadora que reporta la información.	Cadena
	Mes	Mes al que corresponde el dato reportado.	Fecha: AA-MM
	Servicio involucrado	Corresponde al servicio respecto del cual el usuario formuló el reclamo por avería.	Telefonía fija
			Servicios móviles
			Internet fijo
			Televisión de paga
			Empaquetado:Telefonía fija e intenet fijo
			Empaquetado: Telefonía fija y televisión de paga
			Empaquetado: Internet fijo y televisión de paga
			Empaquetado: Telefonía fija, internet fijo y televisión de paga
			Empaquetado: Telefonía fija, servicio móvil, Internet fijo y televisión de paga
			Telefonía de uso público
			Arrendamiento de cirtuitos
			Telefonía de larga distancia
			Otros servicios (especificar)
	Departamento	Clasificar los reclamos por departamento siguiendo el criterio de lugar de instalación/activación del servicio o donde requirió la notificación de su reclamo.	Los nombres deben corresponder estrictamente con el Directorio Institucional de Centros Poblados del OSIPTEL.
	Tipo de reclamo	Según origen: Presentados o solucionados	Cadena
	Materia reclamable	Inconveniente que presenta el usuario.	Problema de calidad Servicio no operativo Otros
	N° Reclamos por avería	Cantidad de reclamos por avería presentados por abonados y/o usuarios.	Número entero mayor o igual a cero.
	Información a octubre de 2024, actualizada al 16 de diciembre de 2024.
	Nota general: Información remitida por las empresas operadoras, la misma que podría ser actualizada en caso se reciba nueva información y/o ante una eventual rectificación, ya sea a pedido de parte o por solicitud del OSIPTEL.
